# Supplementary material
Source: publisher figshare collection journal article supplement (https://gsajournals.figshare.com/ndownloader/files/13198781)
Supplement: Supplementary file 1 [file 13198781]

## Sheet: Supplemental Table 2.csv
	baseMeanRibo	l2FCRibo	lfcSERibo	padjRibo	baseMeanMrna	l2FCMrna	lfcSEMrna	padjMrna	baseMeanTrl	l2FCTrl	lfcSETrl	padjTrl	gene	desc
YHR039C	142.973	0.101015	0.332282	0.984538	142.973	-0.00790481	0.457206	0.995869	142.973	0.10892	0.565198	0.999985	MSC7	Protein of unknown function, green fluorescent protein (GFP)-fusion protein localizes to the endoplasmic reticulum; msc7 mutants are defective in directing meiotic recombination events to homologous chromatids
YBL027W	2831.89	-0.0213722	0.312434	0.996333	2831.89	-0.0885882	0.418369	0.995869	2831.89	0.067216	0.522157	0.999985	RPL19B	Protein component of the large (60S) ribosomal subunit, nearly identical to Rpl19Ap and has similarity to rat L19 ribosomal protein; rpl19a and rpl19b single null mutations result in slow growth, while the double null mutation is lethal
YHR041C	59.1694	0.522051	0.406727	0.715116	59.1694	-0.124652	0.541841	0.995869	59.1694	0.646703	0.677511	0.999985	SRB2	Subunit of the RNA polymerase II mediator complex; associates with core polymerase subunits to form the RNA polymerase II holoenzyme; general transcription factor involved in telomere maintenance
YMR078C	48.2051	0.602892	0.458991	0.693557	48.2051	1.23399	0.58307	0.995869	48.2051	-0.631097	0.742029	0.999985	CTF18	Subunit of a complex with Ctf8p that shares some subunits with Replication Factor C and is required for sister chromatid cohesion; may have overlapping functions with Rad24p in the DNA damage replication checkpoint
YBR198C	119.996	-0.325105	0.329216	0.840489	119.996	-0.676513	0.448545	0.995869	119.996	0.351409	0.556386	0.999985	TAF5	Subunit (90 kDa) of TFIID and SAGA complexes, involved in RNA polymerase II transcription initiation and in chromatin modification
YKL175W	103.215	-0.261201	0.338804	0.897526	103.215	0.413413	0.472578	0.995869	103.215	-0.674614	0.581486	0.999985	ZRT3	Vacuolar membrane zinc transporter, transports zinc from storage in the vacuole to the cytoplasm when needed; transcription is induced under conditions of zinc deficiency
YDR350C	31.4279	0.489693	0.509413	0.843811	31.4279	0.417979	0.597634	0.995869	31.4279	0.071714	0.785273	0.999985	ATP22	Specific translational activator for the mitochondrial ATP6 mRNA, encoding a subunit of F1F0 ATP synthase; localized to the mitochondrial inner membrane
YBR275C	102.919	0.614244	0.395061	0.623582	102.919	0.275107	0.511745	0.995869	102.919	0.339137	0.646493	0.999985	RIF1	Protein that binds to the Rap1p C-terminus and acts synergistically with Rif2p to help control telomere length and establish telomeric silencing; deletion results in telomere elongation
YJL174W	162.442	0.213559	0.314342	0.914544	162.442	0.132945	0.439794	0.995869	162.442	0.0806142	0.540583	0.999985	KRE9	Glycoprotein involved in cell wall beta-glucan assembly; null mutation leads to severe growth defects, aberrant multibudded morphology, and mating defects
YKL210W	960.748	0.228587	0.301364	0.903452	960.748	0.343375	0.408542	0.995869	960.748	-0.114788	0.507668	0.999985	UBA1	Ubiquitin activating enzyme (E1), involved in ubiquitin-mediated protein degradation and essential for viability
YNL336W	224.802	0.634001	0.30444	0.357269	224.802	0.402181	0.427653	0.995869	224.802	0.23182	0.524948	0.999985	COS1	Protein of unknown function, member of the DUP380 subfamily of conserved, often subtelomerically-encoded proteins
YLL015W	133.308	0.0380283	0.395815	0.995084	133.308	0.00578348	0.51663	0.995869	133.308	0.0322449	0.650827	0.999985	BPT1	ABC type transmembrane transporter of MRP/CFTR family, found in vacuolar membrane, involved in the transport of unconjugated bilirubin and in heavy metal detoxification via glutathione conjugates, along with Ycf1p
YKL012W	42.88	0.00805369	0.43499	0.997966	42.88	-0.590201	0.549217	0.995869	42.88	0.598255	0.700595	0.999985	PRP40	U1 snRNP protein involved in splicing, interacts with the branchpoint-binding protein during the formation of the second commitment complex
YPL249C-A	841.94	-0.0814317	0.268146	0.984538	841.94	0.241863	0.372677	0.995869	841.94	-0.323294	0.459119	0.999985	RPL36B	Protein component of the large (60S) ribosomal subunit, nearly identical to Rpl36Ap and has similarity to rat L36 ribosomal protein; binds to 5.8 S rRNA
YPR035W	508.84	0.756624	0.317835	0.231113	508.84	0.115402	0.430906	0.995869	508.84	0.641222	0.535443	0.999985	GLN1	Glutamine synthetase (GS), synthesizes glutamine from glutamate and ammonia; with Glt1p, forms the secondary pathway for glutamate biosynthesis from ammonia; expression regulated by nitrogen source and by amino acid limitation
YFR037C	230.834	-0.206109	0.30472	0.915907	230.834	-0.33078	0.426507	0.995869	230.834	0.124672	0.524176	0.999985	RSC8	Component of the RSC chromatin remodeling complex; essential for viability and mitotic growth; homolog of SWI/SNF subunit Swi3p, but unlike Swi3p, does not activate transcription of reporters
YBR154C	112.636	-0.312836	0.335171	0.848304	112.636	-0.445503	0.488809	0.995869	112.636	0.132667	0.592673	0.999985	RPB5	RNA polymerase subunit ABC27, common to RNA polymerases I, II, and III; contacts DNA and affects transactivation
YEL058W	286.709	0.394692	0.339824	0.791559	286.709	-0.0117722	0.473489	0.995869	286.709	0.406464	0.582814	0.999985	PCM1	Essential N-acetylglucosamine-phosphate mutase; converts GlcNAc-6-P to GlcNAc-1-P, which is a precursor for the biosynthesis of chitin and for the formation of N-glycosylated mannoproteins and glycosylphosphatidylinositol anchors
YKL096W-A	1869.1	-0.332893	0.286951	0.791559	1869.1	0.201242	0.389793	0.995869	1869.1	-0.534135	0.484024	0.999985	CWP2	Covalently linked cell wall mannoprotein, major constituent of the cell wall; plays a role in stabilizing the cell wall; involved in low pH resistance; precursor is GPI-anchored
YDR071C	109.448	-0.103388	0.362932	0.984538	109.448	-0.29255	0.514402	0.995869	109.448	0.189162	0.629543	0.999985	PAA1	Polyamine acetyltransferase; acetylates polyamines (e.g. putrescine, spermidine, spermine) and also aralkylamines (e.g. tryptamine, phenylethylamine); may be involved in transcription and/or DNA replication
YDR475C	38.7365	0.104556	0.481136	0.98971	38.7365	0.365887	0.589585	0.995869	38.7365	-0.261331	0.760992	0.999985	JIP4	Protein of unknown function; previously annotated as two separate ORFs, YDR474C and YDR475C, which were merged as a result of corrections to the systematic reference sequence
YDL095W	931.431	0.753537	0.260306	0.09307	931.431	0.452249	0.363101	0.995869	931.431	0.301288	0.446767	0.999985	PMT1	Protein O-mannosyltransferase, transfers mannose from dolichyl phosphate-D-mannose to protein Ser/Thr residues; 1 of 7 related proteins involved in O-glycosylation which is essential for cell wall rigidity; involved in ER quality control
YJR091C	108.343	-0.0221575	0.371161	0.997417	108.343	-0.173876	0.48146	0.995869	108.343	0.151719	0.607917	0.999985	JSN1	Member of the Puf family of RNA-binding proteins, interacts with mRNAs encoding membrane-associated proteins; involved in localizing the Arp2/3 complex to mitochondria; overexpression causes increased sensitivity to benomyl
YLR259C	1445.79	0.1892	0.262115	0.903452	1445.79	0.132509	0.363401	0.995869	1445.79	0.0566914	0.448067	0.999985	HSP60	Tetradecameric mitochondrial chaperonin required for ATP-dependent folding of precursor polypeptides and complex assembly; prevents aggregation and mediates protein refolding after heat shock; role in mtDNA transmission; phosphorylated
YDR372C	155.673	0.539773	0.312525	0.561747	155.673	-0.0276171	0.443153	0.995869	155.673	0.56739	0.542269	0.999985	VPS74	Protein required for Golgi localization of glycosyltransferases; binds the cytosolic domains of Golgi glycosyltransferases; binding to PtdIns4P required for Golgi targeting and function; tetramer formation required for function
YOR058C	53.966	-1.73306	0.457909	0.00927747	53.966	-1.6242	0.560473	0.365745	53.966	-0.108865	0.723517	0.999985	ASE1	Mitotic spindle midzone localized microtubule-associated protein (MAP) family member; required for spindle elongation and stabilization; undergoes cell cycle-regulated degradation by anaphase promoting complex; potential Cdc28p substrate
YDR170C	702.647	-0.0267512	0.276513	0.995084	702.647	-0.204533	0.377796	0.995869	702.647	0.177782	0.468176	0.999985	SEC7	Guanine nucleotide exchange factor (GEF) for ADP ribosylation factors involved in proliferation of the Golgi, intra-Golgi transport and ER-to-Golgi transport; found in the cytoplasm and on Golgi-associated coated vesicles
YER052C	244.76	0.412908	0.297252	0.670024	244.76	0.332314	0.423046	0.995869	244.76	0.0805939	0.517036	0.999985	HOM3	Aspartate kinase (L-aspartate 4-P-transferase); cytoplasmic enzyme that catalyzes the first step in the common pathway for methionine and threonine biosynthesis; expression regulated by Gcn4p and the general control of amino acid synthesis
YDR017C	118.438	-0.134627	0.397128	0.984538	118.438	-0.463622	0.513084	0.995869	118.438	0.328995	0.648816	0.999985	KCS1	Inositol hexakisphosphate (IP6) and inositol heptakisphosphate (IP7) kinase; generation of high energy inositol pyrophosphates by Kcs1p is required for many processes such as vacuolar biogenesis, stress response and telomere maintenance
YOL034W	46.612	-0.15986	0.430601	0.981235	46.612	0.308195	0.548984	0.995869	46.612	-0.468054	0.697724	0.999985	SMC5	Structural maintenance of chromosomes (SMC) protein; essential subunit of the Mms21-Smc5-Smc6 complex; required for growth and DNA repair; S. pombe homolog forms a heterodimer with S. pombe Rad18p that is involved in DNA repair
YLR287C-A	382.529	-0.391913	0.30116	0.702127	382.529	-0.128539	0.41969	0.995869	382.529	-0.263374	0.516562	0.999985	RPS30A	Protein component of the small (40S) ribosomal subunit; nearly identical to Rps30Bp and has similarity to rat S30 ribosomal protein
YBR132C	56.6423	0.591713	0.416755	0.653911	56.6423	0.413758	0.535169	0.995869	56.6423	0.177955	0.678296	0.999985	AGP2	High affinity polyamine permease, preferentially uses spermidine over putrescine; expression is down-regulated by osmotic stress; plasma membrane carnitine transporter, also functions as a low-affinity amino acid permease
YBR011C	1279.08	0.17724	0.256586	0.909064	1279.08	0.228725	0.357529	0.995869	1279.08	-0.0514845	0.440072	0.999985	IPP1	Cytoplasmic inorganic pyrophosphatase (PPase), homodimer that catalyzes the rapid exchange of oxygens from Pi with water, highly expressed and essential for viability, active-site residues show identity to those from E. coli PPase
YFR015C	227.519	0.69822	0.606955	0.798085	227.519	-0.0675171	0.646146	0.995869	227.519	0.765737	0.886509	0.999985	GSY1	Glycogen synthase with similarity to Gsy2p, the more highly expressed yeast homolog; expression induced by glucose limitation, nitrogen starvation, environmental stress, and entry into stationary phase
YPL158C	47.2783	-1.22565	0.539956	0.281021	47.2783	-1.30241	0.62335	0.995869	47.2783	0.0767553	0.824629	0.999985	AIM44	Protein of unknown function; GFP-fusion protein localizes to the bud neck; transcription is regulated by Swi5p; null mutant displays elevated frequency of mitochondrial genome loss
YNL273W	47.8808	0.879686	0.426915	0.372262	47.8808	1.13125	0.553869	0.995869	47.8808	-0.251567	0.699251	0.999985	TOF1	Subunit of a replication-pausing checkpoint complex (Tof1p-Mrc1p-Csm3p) that acts at the stalled replication fork to promote sister chromatid cohesion after DNA damage, facilitating gap repair of damaged DNA; interacts with the MCM helicase
YNL071W	503.569	0.25063	0.312169	0.88906	503.569	0.0183151	0.426341	0.995869	503.569	0.232315	0.528409	0.999985	LAT1	Dihydrolipoamide acetyltransferase component (E2) of pyruvate dehydrogenase complex, which catalyzes the oxidative decarboxylation of pyruvate to acetyl-CoA
YKR018C	317.373	0.379304	0.282094	0.676098	317.373	0.149715	0.403034	0.995869	317.373	0.22959	0.491948	0.999985		Putative protein of unknown function; green fluorescent protein (GFP)-fusion protein localizes to the cytoplasm and nucleus
YNL116W	35.4901	-0.622932	0.463997	0.676963	35.4901	-0.109569	0.585968	0.995869	35.4901	-0.513363	0.74742	0.999985	DMA2	Protein involved in ubiquitination; plays a role in regulating spindle position and orientation; functionally redundant with Dma1p; orthologous to human RNF8 protein, also has sequence similarity to human Chfr
YMR258C	46.1124	0.457552	0.433372	0.824259	46.1124	0.576014	0.563404	0.995869	46.1124	-0.118462	0.710795	0.999985		Protein of unknown function with similarity to F-box proteins; physically interacts with Skp1p; green fluorescent protein (GFP)-fusion protein localizes to the cytoplasm and nucleus; YMR258C is not an essential gene
YGL197W	134.064	0.244132	0.35121	0.908815	134.064	-0.384229	0.464914	0.995869	134.064	0.628361	0.58266	0.999985	MDS3	Putative component of the TOR regulatory pathway; negative regulator of early meiotic gene expression; required, with Pmd1p, for growth under alkaline conditions; has an N-terminal kelch-like domain
YFR051C	376.974	0.214272	0.295769	0.903452	376.974	0.0780633	0.411583	0.995869	376.974	0.136209	0.506833	0.999985	RET2	Delta subunit of the coatomer complex (COPI), which coats Golgi-derived transport vesicles; involved in retrograde transport between Golgi and ER
YLR295C	134.897	0.226986	0.34274	0.918407	134.897	0.230331	0.477172	0.995869	134.897	-0.00334546	0.587507	0.999985	ATP14	Subunit h of the F0 sector of mitochondrial F1F0 ATP synthase, which is a large, evolutionarily conserved enzyme complex required for ATP synthesis
YBR055C	47.8712	0.252188	0.43347	0.940196	47.8712	-0.24445	0.553854	0.995869	47.8712	0.496638	0.703312	0.999985	PRP6	Splicing factor, component of the U4/U6-U5 snRNP complex
YJL112W	50.2366	0.709935	0.420604	0.573781	50.2366	0.109299	0.537212	0.995869	50.2366	0.600636	0.682277	0.999985	MDV1	Peripheral protein of the cytosolic face of the mitochondrial outer membrane, required for mitochondrial fission; interacts with Fis1p and with the dynamin-related GTPase Dnm1p; contains WD repeats
YIL076W	131.971	0.230193	0.375908	0.933902	131.971	0.708395	0.507158	0.995869	131.971	-0.478202	0.631282	0.999985	SEC28	Epsilon-COP subunit of the coatomer; regulates retrograde Golgi-to-ER protein traffic; stabilizes Cop1p, the alpha-COP and the coatomer complex; non-essential for cell growth
YCR023C	36.9991	0.00676105	0.484889	0.997966	36.9991	0.479812	0.587083	0.995869	36.9991	-0.473051	0.761448	0.999985		Vacuolar membrane protein of unknown function; member of the multidrug resistance family; YCR023C is not an essential gene
YDR006C	72.1854	0.0990371	0.385476	0.984538	72.1854	-0.252867	0.503052	0.995869	72.1854	0.351904	0.633758	0.999985	SOK1	Protein whose overexpression suppresses the growth defect of mutants lacking protein kinase A activity; involved in cAMP-mediated signaling; localized to the nucleus; similar to the mouse testis-specific protein PBS13
YBR088C	174.307	1.06619	0.466142	0.274548	174.307	0.498999	0.584264	0.995869	174.307	0.567194	0.747427	0.999985	POL30	Proliferating cell nuclear antigen (PCNA), functions as the sliding clamp for DNA polymerase delta; may function as a docking site for other proteins required for mitotic and meiotic chromosomal DNA replication and for DNA repair
YGR027C	1157.36	-0.197104	0.25008	0.890444	1157.36	0.246292	0.348536	0.995869	1157.36	-0.443396	0.428973	0.999985	RPS25A	Protein component of the small (40S) ribosomal subunit; nearly identical to Rps25Bp and has similarity to rat S25 ribosomal protein
YKL146W	104.924	0.416692	0.335443	0.734969	104.924	-0.0110711	0.462441	0.995869	104.924	0.427763	0.571291	0.999985	AVT3	Vacuolar transporter, exports large neutral amino acids from the vacuole; member of a family of seven S. cerevisiae genes (AVT1-7) related to vesicular GABA-glycine transporters
YDR341C	909.301	0.168915	0.270798	0.929797	909.301	0.362759	0.376237	0.995869	909.301	-0.193844	0.463558	0.999985		Arginyl-tRNA synthetase, proposed to be cytoplasmic but the authentic, non-tagged protein is detected in highly purified mitochondria in high-throughput studies
YJR109C	787.082	0.62933	0.287043	0.307001	787.082	0.48158	0.396385	0.995869	787.082	0.14775	0.489402	0.999985	CPA2	Large subunit of carbamoyl phosphate synthetase, which catalyzes a step in the synthesis of citrulline, an arginine precursor
YBR101C	84.0501	-0.019384	0.353905	0.997417	84.0501	-0.646022	0.499886	0.995869	84.0501	0.626638	0.612468	0.999985	FES1	Hsp70 (Ssa1p) nucleotide exchange factor, cytosolic homolog of Sil1p, which is the nucleotide exchange factor for BiP (Kar2p) in the endoplasmic reticulum
YHR082C	233.188	0.466006	0.299251	0.623582	233.188	0.160391	0.404234	0.995869	233.188	0.305616	0.502948	0.999985	KSP1	Ser/thr protein kinase; nuclear translocation required for haploid filamentous growth; regulates filamentous growth induced nuclear translocation of Bcy1p, Fus3p, and Sks1p; overproduction causes allele-specific suppression of prp20-10
YNL262W	254.16	1.13731	0.315377	0.0156642	254.16	0.0627679	0.432251	0.995869	254.16	1.07454	0.535073	0.999985	POL2	Catalytic subunit of DNA polymerase (II) epsilon, a chromosomal DNA replication polymerase that exhibits processivity and proofreading exonuclease activity; also involved in DNA synthesis during DNA repair; interacts extensively with Mrc1p
YPR204W	31.0833	0.464249	0.543403	0.879211	31.0833	0.260144	0.604805	0.995869	31.0833	0.204105	0.813059	0.999985		Helicase-like protein encoded within the telomeric Y' element
YPR143W	55.9731	-0.683344	0.401379	0.564468	55.9731	-0.270959	0.549622	0.995869	55.9731	-0.412385	0.680553	0.999985	RRP15	Nucleolar protein, constituent of pre-60S ribosomal particles; required for proper processing of the 27S pre-rRNA at the A3 and B1 sites to yield mature 5.8S and 25S rRNAs
YNL161W	88.8426	0.00330883	0.364046	0.997966	88.8426	-0.202796	0.493672	0.995869	88.8426	0.206105	0.613383	0.999985	CBK1	Serine/threonine protein kinase that regulates cell morphogenesis pathways; involved in cell wall biosynthesis, apical growth, proper mating projection morphology, bipolar bud site selection in diploid cells, and cell separation
YBL050W	124.672	0.365337	0.328666	0.808298	124.672	0.379156	0.462286	0.995869	124.672	-0.0138191	0.567212	0.999985	SEC17	Peripheral membrane protein required for vesicular transport between ER and Golgi, the 'priming' step in homotypic vacuole fusion, and autophagy; stimulates the ATPase activity of Sec18p; has similarity to mammalian alpha-SNAP
YCR067C	137.367	0.270654	0.331062	0.88906	137.367	0.279764	0.451082	0.995869	137.367	-0.00910973	0.559533	0.999985	SED4	Integral endoplasmic reticulum membrane protein, functions as a positive regulator of Sar1p probably through inhibition of GTPase activation by Sec23p; binds Sec16p, participates in vesicle formation, similar to Sec12p
YLR199C	50.5227	0.48348	0.460943	0.824259	50.5227	0.543722	0.585943	0.995869	50.5227	-0.0602413	0.745511	0.999985	PBA1	Protein involved in 20S proteasome assembly; forms a heterodimer with Add66p that binds to proteasome precursors; similar to human PAC1 constituent of the PAC1-PAC2 complex involved in proteasome assembly
YLL026W	1260.56	1.38249	0.322163	0.00165526	1260.56	0.980157	0.430798	0.938621	1260.56	0.402337	0.537936	0.999985	HSP104	Heat shock protein that cooperates with Ydj1p (Hsp40) and Ssa1p (Hsp70) to refold and reactivate previously denatured, aggregated proteins; responsive to stresses including: heat, ethanol, and sodium arsenite; involved in
YNL327W	96.1215	-1.19624	0.477034	0.19931	96.1215	-0.725056	0.578141	0.995869	96.1215	-0.471187	0.749527	0.999985	EGT2	Glycosylphosphatidylinositol (GPI)-anchored cell wall endoglucanase required for proper cell separation after cytokinesis, expression is activated by Swi5p and tightly regulated in a cell cycle-dependent manner
YGR261C	136.941	0.0597826	0.323345	0.98971	136.941	-0.0989401	0.442492	0.995869	136.941	0.158723	0.548043	0.999985	APL6	Beta3-like subunit of the yeast AP-3 complex; functions in transport of alkaline phosphatase to the vacuole via the alternate pathway; exists in both cytosolic and peripherally associated membrane-bound pools
YDR143C	86.9481	-0.220706	0.391951	0.940196	86.9481	-0.00979644	0.510024	0.995869	86.9481	-0.21091	0.643234	0.999985	SAN1	Ubiquitin-protein ligase, involved in the proteasome-dependent degradation of aberrant nuclear proteins; contains intrinsically disordered regions that contribute to substrate recognition
YJL222W	100.265	0.203071	0.359427	0.940196	100.265	-0.834394	0.473084	0.995869	100.265	1.03746	0.594132	0.999985	VTH2	Putative membrane glycoprotein with strong similarity to Vth1p and Pep1p/Vps10p, may be involved in vacuolar protein sorting
YIL144W	43.3813	-0.376751	0.438536	0.876617	43.3813	-0.069717	0.55336	0.995869	43.3813	-0.307034	0.706056	0.999985	TID3	Component of the evolutionarily conserved kinetochore-associated Ndc80 complex (Ndc80p-Nuf2p-Spc24p-Spc25p); conserved coiled-coil protein involved in chromosome segregation, spindle checkpoint activity, kinetochore assembly and clustering
YDL185W	3247.49	0.232165	0.242292	0.84421	3247.49	0.0901089	0.333669	0.995869	3247.49	0.142057	0.412359	0.999985	VMA1	Subunit A of the eight-subunit V1 peripheral membrane domain of the vacuolar H+-ATPase; protein precursor undergoes self-catalyzed splicing to yield the extein Tfp1p and the intein Vde (PI-SceI), which is a site-specific endonuclease
YDL084W	684.982	-0.0990787	0.31653	0.984538	684.982	0.14547	0.425716	0.995869	684.982	-0.244548	0.530495	0.999985	SUB2	Component of the TREX complex required for nuclear mRNA export; member of the DEAD-box RNA helicase superfamily and is involved in early and late steps of spliceosome assembly; homolog of the human splicing factor hUAP56
YER043C	2243.31	0.203857	0.25922	0.890444	2243.31	-0.0144539	0.357827	0.995869	2243.31	0.218311	0.441854	0.999985	SAH1	S-adenosyl-L-homocysteine hydrolase, catabolizes S-adenosyl-L-homocysteine which is formed after donation of the activated methyl group of S-adenosyl-L-methionine (AdoMet) to an acceptor
YMR285C	61.5633	-0.148086	0.385318	0.979652	61.5633	-0.496264	0.522079	0.995869	61.5633	0.348177	0.648862	0.999985	NGL2	Protein involved in 5.8S rRNA processing; Ccr4p-like RNase required for correct 3'-end formation of 5.8S rRNA at site E; similar to Ngl1p and Ngl3p
YBR123C	47.3413	-0.284697	0.409747	0.908815	47.3413	0.308763	0.545211	0.995869	47.3413	-0.593461	0.682031	0.999985	TFC1	One of six subunits of the RNA polymerase III transcription initiation factor complex (TFIIIC); part of the TauA globular domain of TFIIIC that binds DNA at the BoxA promoter sites of tRNA and similar genes; human homolog is TFIIIC-63
YLL004W	43.0804	-0.114051	0.455038	0.985004	43.0804	-0.441055	0.581906	0.995869	43.0804	0.327005	0.738674	0.999985	ORC3	Subunit of the origin recognition complex, which directs DNA replication by binding to replication origins and is also involved in transcriptional silencing
YML027W	48.3709	-1.04996	0.48373	0.318838	48.3709	-0.871399	0.584451	0.995869	48.3709	-0.178557	0.758539	0.999985	YOX1	Homeodomain-containing transcriptional repressor, binds to Mcm1p and to early cell cycle boxes (ECBs) in the promoters of cell cycle-regulated genes expressed in M/G1 phase; expression is cell cycle-regulated; potential Cdc28p substrate
YPR024W	141.503	-0.0426137	0.323562	0.994327	141.503	0.237327	0.448535	0.995869	141.503	-0.279941	0.553062	0.999985	YME1	Catalytic subunit of the mitochondrial inner membrane i-AAA protease complex, which is responsible for degradation of unfolded or misfolded mitochondrial gene products; mutation causes an elevated rate of mitochondrial turnover
YPR125W	62.4967	0.328753	0.380701	0.876617	62.4967	0.519462	0.519715	0.995869	62.4967	-0.190709	0.644233	0.999985	YLH47	Mitochondrial inner membrane protein exposed to the mitochondrial matrix, associates with mitochondrial ribosomes, NOT required for respiratory growth; homolog of human Letm1, a protein implicated in Wolf-Hirschhorn syndrome
YHR028C	127.399	0.117829	0.33811	0.98435	127.399	0.497152	0.46023	0.995869	127.399	-0.379323	0.571079	0.999985	DAP2	Dipeptidyl aminopeptidase, synthesized as a glycosylated precursor; localizes to the vacuolar membrane; similar to Ste13p
YOL061W	211.367	-0.239577	0.308196	0.89396	211.367	-0.445613	0.432774	0.995869	211.367	0.206035	0.531296	0.999985	PRS5	5-phospho-ribosyl-1(alpha)-pyrophosphate synthetase, synthesizes PRPP, which is required for nucleotide, histidine, and tryptophan biosynthesis; one of five related enzymes, which are active as heteromultimeric complexes
YGR005C	108.248	0.325062	0.369207	0.876617	108.248	-0.224498	0.517476	0.995869	108.248	0.54956	0.635685	0.999985	TFG2	TFIIF (Transcription Factor II) middle subunit; involved in both transcription initiation and elongation of RNA polymerase II; homologous to human RAP30
YML063W	3350.71	-0.0571757	0.237472	0.986503	3350.71	0.242377	0.32721	0.995869	3350.71	-0.299553	0.404301	0.999985	RPS1B	Ribosomal protein 10 (rp10) of the small (40S) subunit; nearly identical to Rps1Ap and has similarity to rat S3a ribosomal protein
YKR081C	145.08	-0.88723	0.333449	0.155674	145.08	-0.890502	0.480296	0.995869	145.08	0.00327232	0.584666	0.999985	RPF2	Essential protein involved in the processing of pre-rRNA and the assembly of the 60S ribosomal subunit; interacts with ribosomal protein L11; localizes predominantly to the nucleolus; constituent of 66S pre-ribosomal particles
YDL019C	160.568	0.128217	0.34209	0.981235	160.568	-0.073611	0.461922	0.995869	160.568	0.201828	0.574802	0.999985	OSH2	Member of an oxysterol-binding protein family with seven members in S. cerevisiae; family members have overlapping, redundant functions in sterol metabolism and collectively perform a function essential for viability
YDR398W	142.232	-0.98387	0.363931	0.141622	142.232	-0.90703	0.493194	0.995869	142.232	-0.0768404	0.612905	0.999985	UTP5	Subunit of U3-containing Small Subunit (SSU) processome complex involved in production of 18S rRNA and assembly of small ribosomal subunit
YKL135C	91.155	-0.10443	0.357322	0.984538	91.155	0.323186	0.484297	0.995869	91.155	-0.427616	0.601854	0.999985	APL2	Beta-adaptin, large subunit of the clathrin-associated protein (AP-1) complex; binds clathrin; involved in clathrin-dependent Golgi protein sorting
YPR112C	233.192	-0.752877	0.315777	0.230844	233.192	-1.02071	0.43936	0.898884	233.192	0.26783	0.541053	0.999985	MRD1	Essential conserved protein that is part of the 90S preribosome; required for production of 18S rRNA and small ribosomal subunit; contains five consensus RNA-binding domains
YDR156W	57.065	-0.178216	0.407293	0.966079	57.065	0.339408	0.547117	0.995869	57.065	-0.517624	0.682085	0.999985	RPA14	RNA polymerase I subunit A14
YER157W	52.9162	0.0659763	0.427727	0.991029	52.9162	-0.594941	0.546496	0.995869	52.9162	0.660918	0.693971	0.999985	COG3	Essential component of the conserved oligomeric Golgi complex (Cog1p through Cog8p), a cytosolic tethering complex that functions in protein trafficking to mediate fusion of transport vesicles to Golgi compartments
YGR155W	1579.42	0.0687223	0.241749	0.984538	1579.42	0.0360924	0.336211	0.995869	1579.42	0.0326299	0.414102	0.999985	CYS4	Cystathionine beta-synthase, catalyzes synthesis of cystathionine from serine and homocysteine, the first committed step in cysteine biosynthesis; responsible for hydrogen sulfide generation; mutations in human ortholog cause homocystinuria
YKL016C	158.265	-0.114424	0.385518	0.984538	158.265	0.363141	0.513407	0.995869	158.265	-0.477565	0.642038	0.999985	ATP7	Subunit d of the stator stalk of mitochondrial F1F0 ATP synthase, which is a large, evolutionarily conserved enzyme complex required for ATP synthesis
YBR235W	79.3204	-0.0850768	0.367913	0.987219	79.3204	-0.0126753	0.492659	0.995869	79.3204	-0.0724015	0.614876	0.999985		Putative ion transporter, similar to mammalian electroneutral Na(+)-(K+)-C1- cotransporter family; YBR235W is not an essential gene
YIL137C	277.905	0.418993	0.274921	0.626774	277.905	0.6637	0.391238	0.995869	277.905	-0.244707	0.478172	0.999985	TMA108	Protein that associates with ribosomes and is involved in ribosome biogenesis; putative metalloprotease
YER030W	90.7377	0.315771	0.39048	0.88906	90.7377	-0.0680291	0.539234	0.995869	90.7377	0.3838	0.665769	0.999985	CHZ1	Histone chaperone for Htz1p/H2A-H2B dimer; required for the stabilization of the Chz1p-Htz1-H2B complex; has overlapping function with Nap1p; null mutant displays weak sensitivity to MMS and benomyl; contains a highly conserved CHZ motif
YLR318W	23.4073	0.0347217	0.571991	0.997417	23.4073	0.00477734	0.627493	0.995869	23.4073	0.0299444	0.849071	0.999985	EST2	Reverse transcriptase subunit of the telomerase holoenzyme, essential for telomerase core catalytic activity, involved in other aspects of telomerase assembly and function; mutations in human homolog are associated with aplastic anemia
YCR036W	94.281	0.188474	0.342595	0.940966	94.281	0.0576559	0.484095	0.995869	94.281	0.130818	0.593059	0.999985	RBK1	Putative ribokinase
YPR156C	468.649	-0.620257	0.321415	0.440985	468.649	-0.553152	0.432723	0.995869	468.649	-0.0671051	0.539032	0.999985	TPO3	Polyamine transport protein specific for spermine; localizes to the plasma membrane; member of the major facilitator superfamily
YDR354W	75.0696	-0.25288	0.375524	0.91644	75.0696	0.527564	0.513415	0.995869	75.0696	-0.780444	0.636103	0.999985	TRP4	Anthranilate phosphoribosyl transferase of the tryptophan biosynthetic pathway, catalyzes the phosphoribosylation of anthranilate, subject to the general control system of amino acid biosynthesis
YPL091W	515.806	0.598845	0.267313	0.289874	515.806	0.475854	0.380909	0.995869	515.806	0.122991	0.465347	0.999985	GLR1	Cytosolic and mitochondrial glutathione oxidoreductase, converts oxidized glutathione to reduced glutathione; mitochondrial but not cytosolic form has a role in resistance to hyperoxia
YPR075C	98.1578	0.583371	0.363943	0.595772	98.1578	0.566255	0.493159	0.995869	98.1578	0.0171156	0.612907	0.999985	OPY2	Integral membrane protein that functions in the signaling branch of the high-osmolarity glycerol (HOG) pathway; interacts with Ste50p; overproduction blocks cell cycle arrest in the presence of mating pheromone
YGR032W	270.506	0.526047	0.362958	0.646744	270.506	-0.366585	0.488604	0.995869	270.506	0.892632	0.608665	0.999985	GSC2	Catalytic subunit of 1,3-beta-glucan synthase, involved in formation of the inner layer of the spore wall; activity positively regulated by Rho1p and negatively by Smk1p; has similarity to an alternate catalytic subunit, Fks1p (Gsc1p)
YNL255C	493.658	-0.117786	0.356313	0.984538	493.658	-0.154394	0.472586	0.995869	493.658	0.0366083	0.591858	0.999985	GIS2	RNA binding protein that binds to mRNAs coding for RNA processing factors, chromatin modifiers and GTPases; has sequence and functional similarity to CNBP, a gene involved in myotonic dystrophy type 2; contains seven CCHC zinc-finger motifs
YBR114W	40.5627	1.07008	0.459621	0.255002	40.5627	0.793064	0.566656	0.995869	40.5627	0.277016	0.729575	0.999985	RAD16	Protein that recognizes and binds damaged DNA in an ATP-dependent manner (with Rad7p) during nucleotide excision repair; subunit of Nucleotide Excision Repair Factor 4 (NEF4) and the Elongin-Cullin-Socs (ECS) ligase complex
YBR271W	43.3155	-0.324931	0.439952	0.903452	43.3155	-0.418475	0.571095	0.995869	43.3155	0.0935443	0.720877	0.999985		Putative S-adenosylmethionine-dependent methyltransferase of the seven beta-strand family; green fluorescent protein (GFP)-fusion protein localizes to the cytoplasm; predicted to be involved in ribosome biogenesis
YKL052C	55.6257	0.206404	0.410005	0.952039	55.6257	-0.173637	0.535128	0.995869	55.6257	0.380041	0.674139	0.999985	ASK1	Essential subunit of the Dam1 complex (aka DASH complex), couples kinetochores to the force produced by MT depolymerization thereby aiding in chromosome segregation; phosphorylated during the cell cycle by cyclin-dependent kinases
YOR191W	81.5637	-0.128638	0.402222	0.984538	81.5637	-0.172516	0.513739	0.995869	81.5637	0.0438779	0.652462	0.999985	ULS1	RING finger protein involved in proteolytic control of sumoylated substrates; interacts with SUMO (Smt3p); member of the SWI/SNF family of DNA-dependent ATPases; plays a role in antagonizing silencing during mating-type switching
YBR073W	123.251	0.369561	0.358168	0.830872	123.251	0.321263	0.477573	0.995869	123.251	0.0482975	0.596959	0.999985	RDH54	DNA-dependent ATPase, stimulates strand exchange by modifying the topology of double-stranded DNA; involved in recombinational repair of DNA double-strand breaks during mitosis and meiosis; proposed to be involved in crossover interference
YHR196W	149.774	-0.887777	0.34822	0.182282	149.774	-0.390955	0.469134	0.995869	149.774	-0.496821	0.584238	0.999985	UTP9	Nucleolar protein, component of the small subunit (SSU) processome containing the U3 snoRNA that is involved in processing of pre-18S rRNA
YGR199W	83.7697	0.256576	0.383209	0.917729	83.7697	0.122295	0.517518	0.995869	83.7697	0.134281	0.643952	0.999985	PMT6	Protein O-mannosyltransferase, transfers mannose from dolichyl phosphate-D-mannose to protein serine/threonine residues of secretory proteins; reaction is essential for cell wall rigidity; member of a family of mannosyltransferases
YDR299W	132.111	-0.727371	0.373428	0.428633	132.111	-0.660904	0.500443	0.995869	132.111	-0.0664675	0.624393	0.999985	BFR2	Essential protein that is a component of 90S preribosomes; may be involved in rRNA processing; multicopy suppressor of sensitivity to Brefeldin A; expression is induced during lag phase and also by cold shock
YPL118W	61.9788	0.0328484	0.426177	0.996333	61.9788	-0.0796234	0.557088	0.995869	61.9788	0.112472	0.701408	0.999985	MRP51	Mitochondrial ribosomal protein of the small subunit; MRP51 exhibits genetic interactions with mutations in the COX2 and COX3 mRNA 5'-untranslated leader sequences
YJR059W	130.754	0.212179	0.39568	0.946075	130.754	0.17426	0.516295	0.995869	130.754	0.0379186	0.650479	0.999985	PTK2	Putative serine/threonine protein kinase involved in regulation of ion transport across plasma membrane; enhances spermine uptake
YNL031C	1137.11	0.472497	0.290407	0.588507	1137.11	0.553855	0.398845	0.995869	1137.11	-0.0813577	0.493369	0.999985	HHT2	Histone H3, core histone protein required for chromatin assembly, part of heterochromatin-mediated telomeric and HM silencing; one of two identical histone H3 proteins (see HHT1); regulated by acetylation, methylation, and phosphorylation
YER131W	729.603	-0.35598	0.265541	0.677685	729.603	-0.454069	0.369197	0.995869	729.603	0.0980889	0.454773	0.999985	RPS26B	Protein component of the small (40S) ribosomal subunit; nearly identical to Rps26Ap and has similarity to rat S26 ribosomal protein
YLR219W	84.8085	-0.107043	0.372545	0.984538	84.8085	0.362742	0.501571	0.995869	84.8085	-0.469786	0.624797	0.999985	MSC3	Protein of unknown function, green fluorescent protein (GFP)-fusion protein localizes to the cell periphery; msc3 mutants are defective in directing meiotic recombination events to homologous chromatids; potential Cdc28p substrate
YIL151C	63.8007	-0.0133999	0.424801	0.997966	63.8007	-0.472752	0.534242	0.995869	63.8007	0.459352	0.68254	0.999985		Putative protein of unknown function, predicted to contain a PINc domain
YOR018W	39.416	0.624511	0.454606	0.673247	39.416	-0.0888018	0.568288	0.995869	39.416	0.713313	0.72775	0.999985	ROD1	Membrane protein that binds the ubiquitin ligase Rsp5p via its 2 PY motifs; overexpression confers resistance to the GST substrate o-dinitrobenzene,zinc, and calcium; proposed to regulate the endocytosis of plasma membrane proteins
YMR139W	40.4237	0.96129	0.433377	0.296739	40.4237	0.446613	0.554341	0.995869	40.4237	0.514677	0.703618	0.999985	RIM11	Protein kinase required for signal transduction during entry into meiosis; promotes the formation of the Ime1p-Ume6p complex by phosphorylating Ime1p and Ume6p; shares similarity with mammalian glycogen synthase kinase 3-beta
YER012W	105.683	0.210615	0.367515	0.940196	105.683	0.0984324	0.505482	0.995869	105.683	0.112183	0.624964	0.999985	PRE1	Beta 4 subunit of the 20S proteasome; localizes to the nucleus throughout the cell cycle
YLR138W	193.377	-0.245642	0.333892	0.903452	193.377	-0.121324	0.450199	0.995869	193.377	-0.124317	0.560501	0.999985	NHA1	Na+/H+ antiporter involved in sodium and potassium efflux through the plasma membrane; required for alkali cation tolerance at acidic pH
YDR211W	294.186	-0.071976	0.273711	0.984538	294.186	-0.149869	0.38869	0.995869	294.186	0.077893	0.475392	0.999985	GCD6	Catalytic epsilon subunit of the translation initiation factor eIF2B, the guanine-nucleotide exchange factor for eIF2; activity subsequently regulated by phosphorylated eIF2; first identified as a negative regulator of GCN4 expression
YJL035C	45.6521	1.57572	0.448276	0.0207985	45.6521	1.18137	0.586365	0.995869	45.6521	0.394349	0.737892	0.999985	TAD2	Subunit of tRNA-specific adenosine-34 deaminase, forms a heterodimer with Tad3p that converts adenosine to inosine at the wobble position of several tRNAs
YML076C	34.55	-1.1017	0.496726	0.296739	34.55	-0.0884148	0.583833	0.995869	34.55	-1.01329	0.766532	0.999985	WAR1	Homodimeric Zn2Cys6 zinc finger transcription factor; binds to a weak acid response element to induce transcription of PDR12 and FUN34, encoding an acid transporter and a putative ammonia transporter, respectively
YDR376W	51.2286	0.32153	0.402707	0.88906	51.2286	-0.0557311	0.537798	0.995869	51.2286	0.377261	0.671863	0.999985	ARH1	Oxidoreductase of the mitochondrial inner membrane, involved in cytoplasmic and mitochondrial iron homeostasis and required for activity of Fe-S cluster-containing enzymes; one of the few mitochondrial proteins essential for viability
YNL156C	47.5343	0.256249	0.43815	0.940196	47.5343	0.216466	0.555953	0.995869	47.5343	0.0397825	0.707857	0.999985	NSG2	Protein involved in regulation of sterol biosynthesis; specifically stabilizes Hmg2p, one of two HMG-CoA isoenzymes that catalyze the rate-limiting step in sterol biosynthesis; homolog of mammalian INSIG proteins
YNL310C	43.5538	0.332117	0.433837	0.898803	43.5538	0.668082	0.567398	0.995869	43.5538	-0.335965	0.714252	0.999985	ZIM17	Heat shock protein with a zinc finger motif; essential for protein import into mitochondria; may act with Pam18p to facilitate recognition and folding of imported proteins by Ssc1p (mtHSP70) in the mitochondrial matrix
YDR174W	158.513	0.0743889	0.390597	0.98971	158.513	-0.176351	0.512673	0.995869	158.513	0.25074	0.644514	0.999985	HMO1	Chromatin associated high mobility group (HMG) family member involved in genome maintenance; rDNA-binding component of the Pol I transcription system; associates with a 5'-3' DNA helicase and Fpr1p, a prolyl isomerase
YGR054W	242.276	-0.239226	0.287952	0.887234	242.276	-0.655203	0.407779	0.995869	242.276	0.415977	0.499196	0.999985		Eukaryotic initiation factor (eIF) 2A; associates specifically with both 40S subunits and 80 S ribosomes, and interacts genetically with both eIF5b and eIF4E; homologous to mammalian eIF2A
YML032C	56.888	-0.135375	0.392055	0.984538	56.888	0.0596651	0.52318	0.995869	56.888	-0.19504	0.653779	0.999985	RAD52	Protein that stimulates strand exchange by facilitating Rad51p binding to single-stranded DNA; anneals complementary single-stranded DNA; involved in the repair of double-strand breaks in DNA during vegetative growth and meiosis
YBR136W	57.9429	-0.20916	0.416452	0.952039	57.9429	-0.734166	0.527478	0.995869	57.9429	0.525006	0.672039	0.999985	MEC1	Genome integrity checkpoint protein and PI kinase superfamily member; signal transducer required for cell cycle arrest and transcriptional responses prompted by damaged or unreplicated DNA; monitors and participates in meiotic recombination
YKR058W	25.7128	0.357403	0.589073	0.933902	25.7128	0.0250514	0.643252	0.995869	25.7128	0.332352	0.872227	0.999985	GLG1	Self-glucosylating initiator of glycogen synthesis, also glucosylates n-dodecyl-beta-D-maltoside; similar to mammalian glycogenin
YDL190C	190.492	0.286507	0.293542	0.841273	190.492	0.367707	0.413987	0.995869	190.492	-0.0811996	0.507496	0.999985	UFD2	Ubiquitin chain assembly factor (E4) that cooperates with a ubiquitin-activating enzyme (E1), a ubiquitin-conjugating enzyme (E2), and a ubiquitin protein ligase (E3) to conjugate ubiquitin to substrates; also functions as an E3
YIL115C	284.21	0.164445	0.279396	0.937584	284.21	-0.167708	0.388891	0.995869	284.21	0.332154	0.478851	0.999985	NUP159	Nucleoporin, subunit of the nuclear pore complex that is found exclusively on the cytoplasmic side, member of the Nup82 subcomplex, required for mRNA export
YNR019W	88.1642	0.167232	0.354374	0.955204	88.1642	0.515584	0.495368	0.995869	88.1642	-0.348352	0.609076	0.999985	ARE2	Acyl-CoA:sterol acyltransferase, isozyme of Are1p; endoplasmic reticulum enzyme that contributes the major sterol esterification activity in the presence of oxygen
YPL239W	92.2272	-0.396722	0.386799	0.830872	92.2272	-0.756755	0.534728	0.995869	92.2272	0.360033	0.659935	0.999985	YAR1	Cytoplasmic ankyrin-repeat containing protein of unknown function, proposed to link the processes of 40S ribosomal subunit biogenesis and adaptation to osmotic and oxidative stress; expression repressed by heat shock
YGL038C	95.282	-0.265082	0.354282	0.903452	95.282	-0.0228	0.476045	0.995869	95.282	-0.242282	0.593409	0.999985	OCH1	Mannosyltransferase of the cis-Golgi apparatus, initiates the polymannose outer chain elongation of N-linked oligosaccharides of glycoproteins
YDR389W	65.4901	-0.549615	0.40436	0.676098	65.4901	-0.361178	0.515832	0.995869	65.4901	-0.188437	0.655416	0.999985	SAC7	GTPase activating protein (GAP) for Rho1p, involved in signaling to the actin cytoskeleton, null mutations suppress tor2 mutations and temperature sensitive mutations in actin; potential Cdc28p substrate
YLR381W	30.922	0.643878	0.504966	0.71659	30.922	0.187355	0.606231	0.995869	30.922	0.456523	0.78898	0.999985	CTF3	Outer kinetochore protein that forms a complex with Mcm16p and Mcm22p; may bind the kinetochore to spindle microtubules
YLL022C	88.2026	0.554507	0.441084	0.723513	88.2026	-0.498174	0.581838	0.995869	88.2026	1.05268	0.730137	0.999985	HIF1	Non-essential component of the HAT-B histone acetyltransferase complex (Hat1p-Hat2p-Hif1p), localized to the nucleus; has a role in telomeric silencing
YNL121C	237.813	-0.126761	0.327667	0.979652	237.813	-0.208701	0.450412	0.995869	237.813	0.0819391	0.556988	0.999985	TOM70	Component of the TOM (translocase of outer membrane) complex responsible for recognition and initial import steps for all mitochondrially directed proteins; acts as a receptor for incoming precursor proteins
YMR128W	316.217	-0.240096	0.291014	0.887234	316.217	-0.650554	0.409775	0.995869	316.217	0.410457	0.502595	0.999985	ECM16	Essential DEAH-box ATP-dependent RNA helicase specific to the U3 snoRNP, predominantly nucleolar in distribution, required for 18S rRNA synthesis
YER021W	226.772	0.0446788	0.294302	0.991029	226.772	0.202065	0.410488	0.995869	226.772	-0.157386	0.505089	0.999985	RPN3	Essential, non-ATPase regulatory subunit of the 26S proteasome lid, similar to the p58 subunit of the human 26S proteasome; temperature-sensitive alleles cause metaphase arrest, suggesting a role for the proteasome in cell cycle control
YER120W	367.929	0.201068	0.303414	0.918407	367.929	0.10408	0.423519	0.995869	367.929	0.0969875	0.520988	0.999985	SCS2	Integral ER membrane protein that regulates phospholipid metabolism via an interaction with the FFAT motif of Opi1p, also involved in telomeric silencing, disruption causes inositol auxotrophy above 34 degrees C, VAP homolog
YLR208W	359.191	-0.0456255	0.273389	0.990857	359.191	0.0824988	0.392354	0.995869	359.191	-0.128124	0.478208	0.999985	SEC13	Component of both the Nup84 nuclear pore sub-complex and the Sec13p-Sec31p complex of the COPII vesicle coat, required for vesicle formation in ER to Golgi transport and nuclear pore complex organization
YDR301W	81.5571	-0.109025	0.37822	0.984538	81.5571	-0.372627	0.501382	0.995869	81.5571	0.263602	0.628035	0.999985	CFT1	RNA-binding subunit of the mRNA cleavage and polyadenylation factor; involved in poly(A) site recognition and required for both pre-mRNA cleavage and polyadenylation, 51% sequence similarity with mammalian AAUAA-binding subunit of CPSF
YEL009C	292.792	0.497949	0.374376	0.683098	292.792	0.1321	0.481472	0.995869	292.792	0.365849	0.609895	0.999985	GCN4	Basic leucine zipper (bZIP) transcriptional activator of amino acid biosynthetic genes in response to amino acid starvation; expression is tightly regulated at both the transcriptional and translational levels
YDR002W	621.706	-0.00931628	0.279684	0.997966	621.706	0.041126	0.392066	0.995869	621.706	-0.0504423	0.4816	0.999985	YRB1	Ran GTPase binding protein; involved in nuclear protein import and RNA export, ubiquitin-mediated protein degradation during the cell cycle; shuttles between the nucleus and cytoplasm; is essential; homolog of human RanBP1
YDR244W	50.4544	-0.336949	0.408941	0.887234	50.4544	0.173229	0.538665	0.995869	50.4544	-0.510178	0.676315	0.999985	PEX5	Peroxisomal membrane signal receptor for the C-terminal tripeptide signal sequence (PTS1) of peroxisomal matrix proteins, required for peroxisomal matrix protein import; also proposed to have PTS1-receptor independent functions
YNL064C	688.664	-0.281783	0.275071	0.830872	688.664	-0.467645	0.381371	0.995869	688.664	0.185862	0.47022	0.999985	YDJ1	Protein chaperone involved in regulation of the HSP90 and HSP70 functions; involved in protein translocation across membranes; member of the DnaJ family
YDR103W	59.5641	-0.51201	0.429892	0.770056	59.5641	-0.695975	0.540884	0.995869	59.5641	0.183964	0.69089	0.999985	STE5	Pheromone-response scaffold protein that controls the mating decision; binds Ste11p, Ste7p, and Fus3p kinases, forming a MAPK cascade complex that interacts with the plasma membrane and Ste4p-Ste18p; allosteric activator of Fus3p
YOR229W	52.6175	-1.55008	0.416726	0.0114369	52.6175	-1.01753	0.554815	0.995869	52.6175	-0.532548	0.693729	0.999985	WTM2	Transcriptional modulator involved in regulation of meiosis, silencing, and expression of RNR genes; involved in response to replication stress; contains WD repeats
YER164W	254.967	0.228501	0.286738	0.88906	254.967	-0.317293	0.399406	0.995869	254.967	0.545793	0.491674	0.999985	CHD1	Nucleosome remodeling factor that functions in regulation of transcription elongation; contains a chromo domain, a helicase domain and a DNA-binding domain; component of both the SAGA and SLIK complexes
YDR406W	41.772	-0.0304659	0.511437	0.997417	41.772	0.0964051	0.603749	0.995869	41.772	-0.126871	0.791255	0.999985	PDR15	Plasma membrane ATP binding cassette (ABC) transporter, multidrug transporter and general stress response factor implicated in cellular detoxification; regulated by Pdr1p, Pdr3p and Pdr8p; promoter contains a PDR responsive element
YHR076W	54.0561	0.6435	0.427501	0.629533	54.0561	0.0586043	0.555344	0.995869	54.0561	0.584895	0.700831	0.999985	PTC7	Type 2C protein phosphatase (PP2C); alternatively spliced to create two mRNA isoforms; protein from spliced form localizes to the mitochondria while the one from the unspliced form is localized to the nuclear envelope
YHR086W	46.7587	0.510239	0.441018	0.792926	46.7587	-0.240921	0.556545	0.995869	46.7587	0.75116	0.710101	0.999985	NAM8	RNA binding protein, component of the U1 snRNP protein; mutants are defective in meiotic recombination and in formation of viable spores, involved in the formation of DSBs through meiosis-specific splicing of MER2 pre-mRNA
YPL228W	58.1042	-0.0273383	0.4221	0.997417	58.1042	-0.36165	0.555682	0.995869	58.1042	0.334312	0.697813	0.999985	CET1	Beta (RNA 5'-triphosphatase) subunit of the mRNA capping enzyme, a heterodimer (the other subunit is CEG1, a guanylyltransferase) involved in adding the 5' cap to mRNA; the mammalian enzyme is a single bifunctional polypeptide
YIL104C	48.968	-0.271942	0.451935	0.934545	48.968	-0.0604274	0.576354	0.995869	48.968	-0.211515	0.732411	0.999985	SHQ1	Chaperone protein required for the assembly of box H/ACA snoRNPs and thus for pre-rRNA processing, forms a complex with Naf1p and interacts with H/ACA snoRNP components Nhp2p and Cbf5p; homology with known Hsp90p cochaperones
YNR008W	112.563	0.178279	0.337228	0.949062	112.563	-0.216808	0.466431	0.995869	112.563	0.395087	0.575569	0.999985	LRO1	Acyltransferase that catalyzes diacylglycerol esterification; one of several acyltransferases that contribute to triglyceride synthesis; putative homolog of human lecithin cholesterol acyltransferase
YPL008W	26.9624	0.0373	0.526424	0.996333	26.9624	-0.063191	0.61727	0.995869	26.9624	0.100491	0.811258	0.999985	CHL1	Probable DNA helicase involved in sister-chromatid cohesion and genome integrity; interacts with ECO1 and CTF18; mutants are defective in silencing, rDNA recombination, aging and the heat shock response; FANCJ-like helicase family member
YGR089W	50.2758	-0.63026	0.434193	0.646744	50.2758	-0.727508	0.542752	0.995869	50.2758	0.0972475	0.695011	0.999985	NNF2	Protein that exhibits physical and genetic interactions with Rpb8p, which is a subunit of RNA polymerases I, II, and III; computational analysis of large-scale protein-protein interaction data suggests a role in chromosome segregation
YNL002C	126.743	-0.622056	0.385671	0.594734	126.743	-0.771501	0.517697	0.995869	126.743	0.149444	0.645544	0.999985	RLP7	Nucleolar protein with similarity to large ribosomal subunit L7 proteins; constituent of 66S pre-ribosomal particles; plays an essential role in processing of precursors to the large ribosomal subunit RNAs
YMR083W	224.024	0.212901	0.285268	0.903452	224.024	0.143891	0.405167	0.995869	224.024	0.0690099	0.495518	0.999985	ADH3	Mitochondrial alcohol dehydrogenase isozyme III; involved in the shuttling of mitochondrial NADH to the cytosol under anaerobic conditions and ethanol production
YBR163W	21.9047	-0.186201	0.558191	0.984538	21.9047	-0.138845	0.628319	0.995869	21.9047	-0.0473555	0.840443	0.999985	EXO5	Mitochondrial 5'-3' exonuclease and sliding exonuclease, required for mitochondrial genome maintenance; distantly related to the RecB nuclease domain of bacterial RecBCD recombinases; may be regulated by the transcription factor Ace2
YIL063C	73.4839	0.0291301	0.364157	0.996333	73.4839	-0.492851	0.501794	0.995869	73.4839	0.521981	0.62	0.999985	YRB2	Protein of unknown function involved in nuclear processes of the Ran-GTPase cycle; involved in nuclear protein export; contains Ran Binding Domain and FxFG repeats; interacts with Srm1p, GTP-Gsp1p, Rna1p and Crm1p; is not essential
YHL040C	45.3333	-0.84141	0.474564	0.537175	45.3333	0.0320962	0.586604	0.995869	45.3333	-0.873507	0.754531	0.999985	ARN1	Transporter, member of the ARN family of transporters that specifically recognize siderophore-iron chelates; responsible for uptake of iron bound to ferrirubin, ferrirhodin, and related siderophores
YLR129W	316.086	-0.427727	0.383183	0.807124	316.086	-0.973711	0.502709	0.995869	316.086	0.545983	0.632092	0.999985	DIP2	Nucleolar protein, specifically associated with the U3 snoRNA, part of the large ribonucleoprotein complex known as the small subunit (SSU) processome, required for 18S rRNA biogenesis, part of the active pre-rRNA processing complex
YNL244C	283.886	-0.513789	0.43675	0.780778	283.886	0.0756429	0.556487	0.995869	283.886	-0.589432	0.70741	0.999985	SUI1	Translation initiation factor eIF1; component of a complex involved in recognition of the initiator codon; modulates translation accuracy at the initiation phase
YPL181W	56.4467	-0.486915	0.406769	0.767204	56.4467	0.147586	0.531368	0.995869	56.4467	-0.634501	0.669194	0.999985	CTI6	Protein that relieves transcriptional repression by binding to the Cyc8p-Tup1p corepressor and recruiting the SAGA complex to the repressed promoter; contains a PHD finger domain
YOR108W	198.44	-0.36881	0.316713	0.791347	198.44	0.0354418	0.432387	0.995869	198.44	-0.404252	0.535971	0.999985	LEU9	Alpha-isopropylmalate synthase II (2-isopropylmalate synthase), catalyzes the first step in the leucine biosynthesis pathway; the minor isozyme, responsible for the residual alpha-IPMS activity detected in a leu4 null mutant
YER102W	3359.69	-0.166244	0.245474	0.915802	3359.69	2.59842	0.343435	1.18372e-10	3359.69	-2.76467	0.422144	1.77978e-07	RPS8B	Protein component of the small (40S) ribosomal subunit; identical to Rps8Ap and has similarity to rat S8 ribosomal protein
YGR100W	69.5838	0.136303	0.389523	0.98435	69.5838	-0.0703929	0.515751	0.995869	69.5838	0.206695	0.646317	0.999985	MDR1	Cytoplasmic GTPase-activating protein for Ypt/Rab transport GTPases Ypt6p, Ypt31p and Sec4p; involved in recycling of internalized proteins and regulation of Golgi secretory function
YHR010W	668.77	-0.13544	0.255345	0.948808	668.77	0.180534	0.354588	0.995869	668.77	-0.315974	0.43696	0.999985	RPL27A	Protein component of the large (60S) ribosomal subunit, nearly identical to Rpl27Bp and has similarity to rat L27 ribosomal protein
YKL025C	47.0025	-0.56102	0.416283	0.676098	47.0025	0.00571443	0.538406	0.995869	47.0025	-0.566734	0.680568	0.999985	PAN3	Essential subunit of the Pan2p-Pan3p poly(A)-ribonuclease complex, which acts to control poly(A) tail length and regulate the stoichiometry and activity of postreplication repair complexes
YML023C	23.9959	0.653383	0.583007	0.802954	23.9959	-0.260503	0.640095	0.995869	23.9959	0.913886	0.865813	0.999985	NSE5	Essential subunit of the Mms21-Smc5-Smc6 complex; required for cell viability and DNA repair
YDR165W	105.427	-0.21458	0.351512	0.933902	105.427	-0.325778	0.494424	0.995869	105.427	0.111198	0.606636	0.999985	TRM82	Subunit of a tRNA methyltransferase complex composed of Trm8p and Trm82p that catalyzes 7-methylguanosine modification of tRNA
YHR169W	59.6886	-1.27831	0.416047	0.062162	59.6886	-0.7009	0.558061	0.995869	59.6886	-0.577413	0.695956	0.999985	DBP8	ATPase, putative RNA helicase of the DEAD-box family; component of 90S preribosome complex involved in production of 18S rRNA and assembly of 40S small ribosomal subunit; ATPase activity stimulated by association with Esf2p
YOR382W	65.9706	0.682537	0.417632	0.588014	65.9706	1.29503	0.5498	0.836572	65.9706	-0.612494	0.69039	0.999985	FIT2	Mannoprotein that is incorporated into the cell wall via a glycosylphosphatidylinositol (GPI) anchor, involved in the retention of siderophore-iron in the cell wall
YOL021C	207.073	-0.344014	0.302734	0.802954	207.073	-0.253714	0.417785	0.995869	207.073	-0.0903002	0.515936	0.999985	DIS3	Exosome core complex catalytic subunit; possesses both endonuclease and 3'-5' exonuclease activity; involved in 3'-5' RNA processing and degradation in both the nucleus and the cytoplasm; has similarity to E. coli RNase R and to human DIS3
YKR057W	504.381	0.0684729	0.261135	0.984538	504.381	-0.286033	0.366779	0.995869	504.381	0.354506	0.450242	0.999985	RPS21A	Protein component of the small (40S) ribosomal subunit; nearly identical to Rps21Bp and has similarity to rat S21 ribosomal protein
YOR283W	84.2668	-0.216926	0.375169	0.940196	84.2668	-0.164527	0.522036	0.995869	84.2668	-0.0523983	0.64286	0.999985		Phosphatase with a broad substrate specificity and some similarity to GPM1/YKL152C, a phosphoglycerate mutase; YOR283W is not an essential gene
YHR068W	536.324	0.193782	0.299102	0.923324	536.324	0.323542	0.41223	0.995869	536.324	-0.129759	0.509309	0.999985	DYS1	Deoxyhypusine synthase, catalyzes formation of deoxyhypusine, the first step in hypusine biosynthesis; triggers posttranslational hypusination of translation elongation factor eIF-5A and regulates its intracellular levels; tetrameric
YDL080C	30.8428	-0.139724	0.494294	0.984538	30.8428	-0.275935	0.59588	0.995869	30.8428	0.136211	0.774195	0.999985	THI3	Probable alpha-ketoisocaproate decarboxylase, may have a role in catabolism of amino acids to long-chain and complex alcohols; required for expression of enzymes involved in thiamine biosynthesis
YFR022W	27.5776	-0.157795	0.508587	0.984538	27.5776	0.224888	0.591393	0.995869	27.5776	-0.382683	0.780022	0.999985	ROG3	Protein that binds the ubiquitin ligase Rsp5p via its 2 PY motifs; has similarity to Rod1p; mutation suppresses the temperature sensitivity of an mck1 rim11 double mutant; proposed to regulate the endocytosis of plasma membrane proteins
YJL204C	46.0142	-0.114271	0.44841	0.984554	46.0142	-0.308077	0.570065	0.995869	46.0142	0.193806	0.725282	0.999985	RCY1	F-box protein involved in recycling plasma membrane proteins internalized by endocytosis; localized to sites of polarized growth
YPR079W	38.0074	0.136022	0.452978	0.984538	38.0074	0.402457	0.577527	0.995869	38.0074	-0.266435	0.733985	0.999985	MRL1	Membrane protein with similarity to mammalian mannose-6-phosphate receptors, possibly functions as a sorting receptor in the delivery of vacuolar hydrolases
YPL015C	96.374	-0.0209081	0.36772	0.997417	96.374	0.0602388	0.484851	0.995869	96.374	-0.081147	0.608523	0.999985	HST2	Cytoplasmic member of the silencing information regulator 2 (Sir2) family of NAD(+)-dependent protein deacetylases; modulates nucleolar (rDNA) and telomeric silencing; possesses NAD(+)-dependent histone deacetylase activity in vitro
YNL178W	3404.31	-0.121261	0.241239	0.952039	3404.31	-0.0598202	0.332441	0.995869	3404.31	-0.0614407	0.410747	0.999985	RPS3	Protein component of the small (40S) ribosomal subunit, has apurinic/apyrimidinic (AP) endonuclease activity; essential for viability; has similarity to E. coli S3 and rat S3 ribosomal proteins
YJR077C	479.893	0.102872	0.311733	0.984538	479.893	0.144191	0.429912	0.995869	479.893	-0.0413191	0.531039	0.999985	MIR1	Mitochondrial phosphate carrier, imports inorganic phosphate into mitochondria; functionally redundant with Pic2p but more abundant than Pic2p under normal conditions; phosphorylated
YDL051W	271.333	0.0549526	0.323341	0.990328	271.333	0.173108	0.44538	0.995869	271.333	-0.118156	0.550375	0.999985	LHP1	RNA binding protein required for maturation of tRNA and U6 snRNA precursors; acts as a molecular chaperone for RNAs transcribed by polymerase III; homologous to human La (SS-B) autoantigen
YIL090W	53.8386	-0.123202	0.397987	0.984538	53.8386	-0.606298	0.527104	0.995869	53.8386	0.483096	0.660461	0.999985	ICE2	Integral ER membrane protein with type-III transmembrane domains; mutations cause defects in cortical ER morphology in both the mother and daughter cells
YOR353C	59.9488	-0.0821224	0.416384	0.98971	59.9488	-0.396608	0.540068	0.995869	59.9488	0.314485	0.681937	0.999985	SOG2	Key component of the RAM signaling network, required for proper cell morphogenesis and cell separation after mitosis
YHR031C	56.7132	0.17353	0.403479	0.968574	56.7132	-0.857232	0.540118	0.995869	56.7132	1.03076	0.674173	0.999985	RRM3	DNA helicase involved in rDNA replication and Ty1 transposition; relieves replication fork pauses at telomeric regions; structurally and functionally related to Pif1p
YGL171W	104.647	-0.493	0.393532	0.727395	104.647	-1.02203	0.527363	0.995869	104.647	0.529034	0.657986	0.999985	ROK1	ATP-dependent RNA helicase of the DEAD box family; required for 18S rRNA synthesis
YDL029W	322.017	0.428341	0.296018	0.646744	322.017	0.149404	0.412982	0.995869	322.017	0.278937	0.508115	0.999985	ARP2	Essential component of the Arp2/3 complex, which is a highly conserved actin nucleation center required for the motility and integrity of actin patches; involved in endocytosis and membrane growth and polarity
YMR272C	183.962	0.304569	0.298962	0.831983	183.962	0.215388	0.42425	0.995869	183.962	0.0891816	0.519006	0.999985	SCS7	Sphingolipid alpha-hydroxylase, functions in the alpha-hydroxylation of sphingolipid-associated very long chain fatty acids, has both cytochrome b5-like and hydroxylase/desaturase domains, not essential for growth
YOR115C	41.0648	0.130163	0.429706	0.984538	41.0648	0.716263	0.558722	0.995869	41.0648	-0.5861	0.704867	0.999985	TRS33	One of 10 subunits of the transport protein particle (TRAPP) complex of the cis-Golgi which mediates vesicle docking and fusion; involved in endoplasmic reticulum (ER) to Golgi membrane traffic
YER078C	44.156	0.0771809	0.430868	0.98971	44.156	0.191028	0.560648	0.995869	44.156	-0.113847	0.707091	0.999985	ICP55	Mitochondrial aminopeptidase; cleaves the N termini of at least 38 imported proteins after cleavage by the mitochondrial processing peptidase (MPP), thereby increasing their stability; member of the aminopeptidase P family
YGL016W	194.749	0.151441	0.298644	0.951072	194.749	-0.300261	0.414421	0.995869	194.749	0.451702	0.510815	0.999985	KAP122	Karyopherin beta, responsible for import of the Toa1p-Toa2p complex into the nucleus; binds to nucleoporins Nup1p and Nup2p; may play a role in regulation of pleiotropic drug resistance
YGL135W	3129.55	0.0661734	0.246019	0.984538	3129.55	-0.629086	0.345173	0.995869	3129.55	0.69526	0.423875	0.999985	RPL1B	N-terminally acetylated protein component of the large (60S) ribosomal subunit, nearly identical to Rpl1Ap and has similarity to E. coli L1 and rat L10a ribosomal proteins; rpl1a rpl1b double null mutation is lethal
YLR071C	121.182	-0.551073	0.386113	0.651021	121.182	-0.273074	0.503152	0.995869	121.182	-0.278	0.634223	0.999985	RGR1	Subunit of the RNA polymerase II mediator complex; associates with core polymerase subunits to form the RNA polymerase II holoenzyme; required for glucose repression, HO repression, RME1 repression and sporulation
YGR159C	806.824	-0.996679	0.358124	0.118676	806.824	-0.891891	0.473903	0.995869	806.824	-0.104789	0.593999	0.999985	NSR1	Nucleolar protein that binds nuclear localization sequences, required for pre-rRNA processing and ribosome biogenesis
YOR270C	1031.49	0.0673723	0.25469	0.984538	1031.49	-0.128069	0.352161	0.995869	1031.49	0.195441	0.434609	0.999985	VPH1	Subunit a of vacuolar-ATPase V0 domain, one of two isoforms (Vph1p and Stv1p); Vph1p is located in V-ATPase complexes of the vacuole while Stv1p is located in V-ATPase complexes of the Golgi and endosomes
YOR151C	1072.87	0.253765	0.267071	0.846154	1072.87	-0.150105	0.366707	0.995869	1072.87	0.40387	0.453653	0.999985	RPB2	RNA polymerase II second largest subunit B150, part of central core; similar to bacterial beta subunit
YJR033C	75.0361	0.542906	0.367352	0.641104	75.0361	0.51824	0.494818	0.995869	75.0361	0.0246652	0.616269	0.999985	RAV1	Subunit of the RAVE complex (Rav1p, Rav2p, Skp1p), which promotes assembly of the V-ATPase holoenzyme; required for transport between the early and late endosome/PVC and for localization of TGN membrane proteins; potential Cdc28p substrate
YPL217C	382.145	-0.564543	0.306906	0.492647	382.145	-0.571559	0.422351	0.995869	382.145	0.00701562	0.522081	0.999985	BMS1	GTPase required for synthesis of 40S ribosomal subunits and for processing the 35S pre-rRNA at sites A0, A1, and A2; interacts with Rcl1p, which stimulates its GTPase and U3 snoRNA binding activities; has similarity to Tsr1p
YLR314C	388.893	0.0151128	0.314035	0.997966	388.893	-0.159482	0.429631	0.995869	388.893	0.174595	0.532166	0.999985	CDC3	Component of the septin ring of the mother-bud neck that is required for cytokinesis; septins recruit proteins to the neck and can act as a barrier to diffusion at the membrane, and they comprise the 10nm filaments seen with EM
YDR097C	178.372	1.57833	0.355153	0.000904719	178.372	1.51916	0.488639	0.262428	178.372	0.0591741	0.604043	0.999985	MSH6	Protein required for mismatch repair in mitosis and meiosis, forms a complex with Msh2p to repair both single-base & insertion-deletion mispairs; potentially phosphorylated by Cdc28p
YPL037C	390.602	-0.0779172	0.278814	0.984538	390.602	0.00646438	0.392092	0.995869	390.602	-0.0843815	0.481117	0.999985	EGD1	Subunit beta1 of the nascent polypeptide-associated complex (NAC) involved in protein targeting, associated with cytoplasmic ribosomes; enhances DNA binding of the Gal4p activator; homolog of human BTF3b
YDL073W	64.9585	-0.487495	0.397078	0.743546	64.9585	-0.661538	0.501687	0.995869	64.9585	0.174043	0.639777	0.999985		Putative protein of unknown function; YDL073W is not an essential gene
YKR054C	170.38	-0.381644	0.340286	0.802954	170.38	-0.333317	0.44751	0.995869	170.38	-0.0483269	0.56219	0.999985	DYN1	Cytoplasmic heavy chain dynein, microtubule motor protein, required for anaphase spindle elongation; involved in spindle assembly, chromosome movement, and spindle orientation during cell division, targeted to microtubule tips by Pac1p
YHR013C	123.586	-0.106155	0.336274	0.984538	123.586	-0.648834	0.47321	0.995869	123.586	0.542679	0.580518	0.999985	ARD1	Subunit of N-terminal acetyltransferase NatA (Nat1p, Ard1p, Nat5p); acetylates many proteins and thus affects telomeric silencing, cell cycle, heat-shock resistance, mating, and sporulation; human Ard1p levels are elevated in cancer cells
YOR216C	60.9969	0.117975	0.402679	0.984538	60.9969	-0.488464	0.532969	0.995869	60.9969	0.606438	0.667981	0.999985	RUD3	Golgi matrix protein involved in the structural organization of the cis-Golgi; interacts genetically with COG3 and USO1
YJL041W	382.421	0.210743	0.303852	0.908815	382.421	-0.000126873	0.417141	0.999757	382.421	0.21087	0.516074	0.999985	NSP1	Essential component of the nuclear pore complex, which mediates nuclear import and export, found in both the Nup82 and Nic96 complexes
YMR171C	61.6681	-0.302755	0.402115	0.903452	61.6681	0.23616	0.517424	0.995869	61.6681	-0.538916	0.655313	0.999985	EAR1	Specificity factor required for Rsp5p-dependent ubiquitination and sorting of specific cargo proteins at the multivesicular body; mRNA is targeted to the bud via the mRNA transport system involving She2p
YOR335C	1274.99	0.131686	0.246291	0.946075	1274.99	0.0931122	0.342571	0.995869	1274.99	0.0385741	0.421917	0.999985	ALA1	Cytoplasmic and mitochondrial alanyl-tRNA synthetase, required for protein synthesis; point mutation (cdc64-1 allele) causes cell cycle arrest at G1; lethality of null mutation is functionally complemented by human homolog
YCR028C-A	114.379	0.147943	0.350598	0.972424	114.379	0.00582079	0.500868	0.995869	114.379	0.142122	0.611382	0.999985	RIM1	Single-stranded DNA-binding protein essential for mitochondrial genome maintenance; involved in mitochondrial DNA replication
YDR295C	34.3055	0.00184405	0.463075	0.998899	34.3055	0.0052811	0.58118	0.995869	34.3055	-0.00343705	0.743107	0.999985	HDA2	Subunit of a possibly tetrameric trichostatin A-sensitive class II histone deacetylase complex containing an Hda1p homodimer and an Hda2p-Hda3p heterodimer; involved in telomere maintenance
YPR097W	116.096	0.0867288	0.338471	0.984538	116.096	0.0519815	0.46278	0.995869	116.096	0.0347473	0.573348	0.999985		Protein that contains a Phox homology (PX) domain and binds phosphoinositides; the authentic, non-tagged protein is detected in highly purified mitochondria in high-throughput studies
YDL150W	96.0099	-0.2209	0.373631	0.936529	96.0099	-0.730947	0.507426	0.995869	96.0099	0.510047	0.630131	0.999985	RPC53	RNA polymerase III subunit C53
YOR371C	62.5928	-0.0634162	0.42088	0.991107	62.5928	-0.310211	0.540947	0.995869	62.5928	0.246795	0.685387	0.999985	GPB1	Multistep regulator of cAMP-PKA signaling; inhibits PKA downstream of Gpa2p and Cyr1p, thereby increasing cAMP dependency; promotes ubiquitin-dependent proteolysis of Ira2p; regulated by G-alpha protein Gpa2p; homolog of Gpb2p
YHR057C	68.7253	0.446073	0.43019	0.830168	68.7253	-0.621993	0.566688	0.995869	68.7253	1.06807	0.711479	0.999985	CPR2	Peptidyl-prolyl cis-trans isomerase (cyclophilin), catalyzes the cis-trans isomerization of peptide bonds N-terminal to proline residues; has a potential role in the secretory pathway
YKR010C	32.1048	-0.614724	0.480048	0.71659	32.1048	-0.299215	0.581821	0.995869	32.1048	-0.31551	0.754263	0.999985	TOF2	Protein required for rDNA silencing and mitotic rDNA condensation; stimulates Cdc14p phosphatase activity and biphasic release to promote rDNA repeat segregation; required for condensin recruitment to the replication fork barrier site
YMR016C	36.9552	0.00553568	0.499715	0.997966	36.9552	-0.0452034	0.611736	0.995869	36.9552	0.0507391	0.789894	0.999985	SOK2	Nuclear protein that plays a regulatory role in the cyclic AMP (cAMP)-dependent protein kinase (PKA) signal transduction pathway; negatively regulates pseudohyphal differentiation; homologous to several transcription factors
YNR051C	154.917	-0.0457669	0.335271	0.994327	154.917	-0.303822	0.459119	0.995869	154.917	0.258055	0.568503	0.999985	BRE5	Ubiquitin protease cofactor, forms deubiquitination complex with Ubp3p that coregulates anterograde and retrograde transport between the endoplasmic reticulum and Golgi compartments; null is sensitive to brefeldin A
YMR135C	47.6162	0.383182	0.43498	0.876617	47.6162	0.454736	0.556975	0.995869	47.6162	-0.0715541	0.706701	0.999985	GID8	Protein of unknown function, involved in proteasome-dependent catabolite inactivation of fructose-1,6-bisphosphatase; contains LisH and CTLH domains, like Vid30p; dosage-dependent regulator of START
YLR336C	163.349	-0.581484	0.345349	0.574767	163.349	-0.0823931	0.476531	0.995869	163.349	-0.499091	0.588511	0.999985	SGD1	Essential nuclear protein, required for biogenesis of the small ribosomal subunit; has a possible role in the osmoregulatory glycerol response; putative homolog of human NOM1 which is implicated in acute myeloid leukemia
YOL078W	54.6498	-0.241372	0.424102	0.940196	54.6498	0.33125	0.53989	0.995869	54.6498	-0.572622	0.686556	0.999985	AVO1	Component of a membrane-bound complex containing the Tor2p kinase and other proteins, which may have a role in regulation of cell growth
YPL026C	40.217	0.501582	0.463743	0.820727	40.217	0.284199	0.566043	0.995869	40.217	0.217382	0.73175	0.999985	SKS1	Putative serine/threonine protein kinase; involved in the adaptation to low concentrations of glucose independent of the SNF3 regulated pathway
YPL127C	147.031	0.565555	0.337587	0.578821	147.031	0.858649	0.486034	0.995869	147.031	-0.293094	0.591767	0.999985	HHO1	Histone H1, a linker histone required for nucleosome packaging at restricted sites; suppresses DNA repair involving homologous recombination; not required for telomeric silencing, basal transcriptional repression, or efficient sporulation
YBR109C	229.44	0.271793	0.287154	0.846154	229.44	-0.0317043	0.424694	0.995869	229.44	0.303497	0.512662	0.999985	CMD1	Calmodulin; Ca++ binding protein that regulates Ca++ independent processes (mitosis, bud growth, actin organization, endocytosis, etc.) and Ca++ dependent processes (stress-activated pathways), targets include Nuf1p, Myo2p and calcineurin
YIL108W	116.834	0.318432	0.331639	0.843892	116.834	0.126379	0.459885	0.995869	116.834	0.192053	0.566991	0.999985		Putative metalloprotease
YJR088C	85.6662	-0.196719	0.358123	0.940966	85.6662	-0.368943	0.497377	0.995869	85.6662	0.172224	0.612884	0.999985	EMC2	Member of a transmembrane complex required for efficient folding of proteins in the ER; null mutant displays induction of the unfolded protein response
YIL009W	69.3603	-0.335139	0.391439	0.878354	69.3603	-0.408656	0.509258	0.995869	69.3603	0.0735167	0.642305	0.999985	FAA3	Long chain fatty acyl-CoA synthetase, activates imported fatty acids; green fluorescent protein (GFP)-fusion protein localizes to the cell periphery
YGL043W	82.8226	-0.0876646	0.395039	0.98929	82.8226	0.00567867	0.527327	0.995869	82.8226	-0.0933433	0.658885	0.999985	DST1	General transcription elongation factor TFIIS, enables RNA polymerase II to read through blocks to elongation by stimulating cleavage of nascent transcripts stalled at transcription arrest sites
YBR080C	310.831	0.31982	0.282772	0.802954	310.831	0.0596519	0.393284	0.995869	310.831	0.260168	0.484389	0.999985	SEC18	ATPase required for vesicular transport between ER and Golgi, the 'priming' step in homotypic vacuole fusion, autophagy, and protein secretion; releases Sec17p from SNAP complexes; has similarity to mammalian NSF
YOR324C	26.0526	0.079714	0.517556	0.991029	26.0526	-0.953366	0.610713	0.995869	26.0526	1.03308	0.800482	0.999985	FRT1	Tail-anchored ER membrane protein that is a substrate of the phosphatase calcineurin; interacts with homolog Frt2p; promotes cell growth in stress conditions, possibly via a role in posttranslational translocation
YLR006C	44.0883	0.298439	0.479486	0.930292	44.0883	-0.155801	0.583221	0.995869	44.0883	0.454239	0.755018	0.999985	SSK1	Cytoplasmic response regulator, part of a two-component signal transducer that mediates osmosensing via a phosphorelay mechanism; dephosphorylated form is degraded by the ubiquitin-proteasome system; potential Cdc28p substrate
YDR349C	59.6212	-0.00390865	0.40824	0.997966	59.6212	0.0623293	0.525837	0.995869	59.6212	-0.0662379	0.665707	0.999985	YPS7	Putative GPI-anchored aspartic protease, member of the yapsin family of proteases involved in cell wall growth and maintenance; located in the cytoplasm and endoplasmic reticulum
YER168C	103.08	0.131322	0.351641	0.981235	103.08	-0.102012	0.494692	0.995869	103.08	0.233334	0.606935	0.999985	CCA1	ATP (CTP):tRNA-specific tRNA nucleotidyltransferase; different forms targeted to the nucleus, cytosol, and mitochondrion are generated via the use of multiple transcriptional and translational start sites
YGL106W	161.586	-0.00449024	0.342727	0.997966	161.586	0.0673178	0.478763	0.995869	161.586	-0.071808	0.588792	0.999985	MLC1	Essential light chain for Myo1p, light chain for Myo2p; stabilizes Myo2p by binding to the neck region; interacts with Myo1p, Iqg1p, and Myo2p to coordinate formation and contraction of the actomyosin ring with targeted membrane deposition
YKL182W	3333.37	0.125755	0.239109	0.949352	3333.37	-0.0725934	0.329071	0.995869	3333.37	0.198348	0.406769	0.999985	FAS1	Beta subunit of fatty acid synthetase, which catalyzes the synthesis of long-chain saturated fatty acids; contains acetyltransacylase, dehydratase, enoyl reductase, malonyl transacylase, and palmitoyl transacylase activities
YPR086W	138.726	0.534932	0.328672	0.588507	138.726	-0.0852415	0.458965	0.995869	138.726	0.620174	0.564513	0.999985	SUA7	Transcription factor TFIIB, a general transcription factor required for transcription initiation and start site selection by RNA polymerase II
YDR284C	77.0058	0.558476	0.383423	0.646744	77.0058	-0.0497388	0.523111	0.995869	77.0058	0.608215	0.648582	0.999985	DPP1	Diacylglycerol pyrophosphate (DGPP) phosphatase, zinc-regulated vacuolar membrane-associated lipid phosphatase, dephosphorylates DGPP to phosphatidate (PA) and Pi, then PA to diacylglycerol; involved in lipid signaling and cell metabolism
YOR360C	60.4703	-0.148558	0.427052	0.98435	60.4703	-0.283676	0.546203	0.995869	60.4703	0.135118	0.693328	0.999985	PDE2	High-affinity cyclic AMP phosphodiesterase, component of the cAMP-dependent protein kinase signaling system, protects the cell from extracellular cAMP, contains readthrough motif surrounding termination codon
YBL020W	60.6265	-0.148923	0.394439	0.981235	60.6265	-0.204438	0.525598	0.995869	60.6265	0.0555149	0.657137	0.999985	RFT1	Essential integral membrane protein that is required for translocation of Man5GlcNac2-PP-Dol from the cytoplasmic side to the lumenal side of the ER membrane but is not the flippase; mutation is suppressed by expression of human p53 protein
YOR261C	272.885	0.580227	0.325238	0.529964	272.885	0.187979	0.439722	0.995869	272.885	0.392248	0.546932	0.999985	RPN8	Essential, non-ATPase regulatory subunit of the 26S proteasome; has similarity to the human p40 proteasomal subunit and to another S. cerevisiae regulatory subunit, Rpn11p
YGL241W	91.6615	0.00663262	0.357302	0.997966	91.6615	0.203501	0.483506	0.995869	91.6615	-0.196869	0.601203	0.999985	KAP114	Karyopherin, responsible for nuclear import of Spt15p, Sua7p, histones H2A and H2B, and Nap1p; amino terminus shows similarity to those of other importins, particularly Cse1p; localization is primarily nuclear
YHR046C	72.5701	0.0531422	0.398236	0.994327	72.5701	-0.0226192	0.533466	0.995869	72.5701	0.0757614	0.665716	0.999985	INM1	Inositol monophosphatase, involved in biosynthesis of inositol and in phosphoinositide second messenger signaling; INM1 expression increases in the presence of inositol and decreases upon exposure to antibipolar drugs lithium and valproate
YLR305C	298.212	-0.0315953	0.31691	0.995084	298.212	-0.466468	0.425521	0.995869	298.212	0.434873	0.530565	0.999985	STT4	Phosphatidylinositol-4-kinase that functions in the Pkc1p protein kinase pathway; required for normal vacuole morphology, cell wall integrity, and actin cytoskeleton organization
YPL163C	128.535	0.878691	0.437562	0.400082	128.535	0.389422	0.560937	0.995869	128.535	0.489269	0.711411	0.999985	SVS1	Cell wall and vacuolar protein, required for wild-type resistance to vanadate
YMR227C	56.5024	-0.53446	0.395479	0.676098	56.5024	-0.573034	0.532273	0.995869	56.5024	0.0385741	0.663077	0.999985	TAF7	TFIID subunit (67 kDa), involved in RNA polymerase II transcription initiation
YPL206C	79.6847	0.260235	0.363094	0.903452	79.6847	0.866935	0.511117	0.995869	79.6847	-0.6067	0.626962	0.999985	PGC1	Phosphatidyl Glycerol phospholipase C; regulates the phosphatidylglycerol (PG) content via a phospholipase C-type degradation mechanism; contains glycerophosphodiester phosphodiesterase motifs
YNR026C	101.729	0.354556	0.360615	0.840489	101.729	-0.479482	0.494622	0.995869	101.729	0.834038	0.612123	0.999985	SEC12	Guanine nucleotide exchange factor (GEF), activates Sar1p by catalyzing the exchange of GDP for GTP; required for the initiation of COPII vesicle formation in ER to Golgi transport; glycosylated integral membrane protein of the ER
YMR205C	2118.33	0.150799	0.24769	0.933902	2118.33	0.0629987	0.341095	0.995869	2118.33	0.0878004	0.42154	0.999985	PFK2	Beta subunit of heterooctameric phosphofructokinase involved in glycolysis, indispensable for anaerobic growth, activated by fructose-2,6-bisphosphate and AMP, mutation inhibits glucose induction of cell cycle-related genes
YPL040C	32.7903	0.000236074	0.461847	0.999592	32.7903	-0.544259	0.578475	0.995869	32.7903	0.544495	0.74021	0.999985	ISM1	Mitochondrial isoleucyl-tRNA synthetase, null mutant is deficient in respiratory growth
YPL141C	115.154	-1.16207	0.351014	0.0349107	115.154	-1.48789	0.469698	0.248623	115.154	0.325821	0.586324	0.999985	FRK1	Putative protein kinase; similar to Kin4p; green fluorescent protein (GFP)-fusion protein localizes to the cytoplasm; interacts with rRNA transcription and ribosome biogenesis factors and the long chain fatty acyl-CoA synthetase Faa3
YHR165C	260.193	-0.387208	0.306182	0.719922	260.193	-0.280887	0.414736	0.995869	260.193	-0.10632	0.515512	0.999985	PRP8	Component of the U4/U6-U5 snRNP complex, involved in the second catalytic step of splicing; mutations of human Prp8 cause retinitis pigmentosa
YDL004W	95.2814	0.652301	0.385629	0.570586	95.2814	0.655503	0.520926	0.995869	95.2814	-0.00320216	0.648127	0.999985	ATP16	Delta subunit of the central stalk of mitochondrial F1F0 ATP synthase, which is a large, evolutionarily conserved enzyme complex required for ATP synthesis; phosphorylated
YBL046W	72.641	-0.0974037	0.378802	0.984538	72.641	-0.610084	0.522178	0.995869	72.641	0.51268	0.645091	0.999985	PSY4	Putative regulatory subunit of an evolutionarily conserved protein phosphatase; localization is cell-cycle dependent and regulated by Cdc28p phosphorylation; required for cisplatin resistance; homolog of mammalian R2
YEL027W	782.29	0.150361	0.333865	0.961853	782.29	0.124111	0.449342	0.995869	782.29	0.0262504	0.559799	0.999985	VMA3	Proteolipid subunit of the vacuolar H(+)-ATPase V0 sector (subunit c; dicyclohexylcarbodiimide binding subunit); required for vacuolar acidification and important for copper and iron metal ion homeostasis
YHR064C	1230.48	0.112901	0.25664	0.965626	1230.48	0.303519	0.355122	0.995869	1230.48	-0.190618	0.43815	0.999985	SSZ1	Hsp70 protein that interacts with Zuo1p (a DnaJ homolog) to form a ribosome-associated complex that binds the ribosome via the Zuo1p subunit; also involved in pleiotropic drug resistance via sequential activation of PDR1 and PDR5; binds ATP
YGL227W	86.9775	1.01215	0.402866	0.19931	86.9775	0.497935	0.52488	0.995869	86.9775	0.514216	0.661657	0.999985	VID30	Protein involved in proteasome-dependent catabolite degradation of fructose-1,6-bisphosphatase (FBPase); binds FBPase; shifts the balance of nitrogen metabolism toward glutamate production; localizes to the nucleus and the cytoplasm
YLR262C	82.3576	0.00624686	0.371802	0.997966	82.3576	-0.429012	0.527112	0.995869	82.3576	0.435259	0.645034	0.999985	YPT6	Rab family GTPase, Ras-like GTP binding protein involved in the secretory pathway, required for fusion of endosome-derived vesicles with the late Golgi, maturation of the vacuolar carboxypeptidase Y; has similarity to the human GTPase, Rab6
YGR148C	854.672	0.0285518	0.37563	0.996333	854.672	0.0496923	0.490783	0.995869	854.672	-0.0211405	0.618034	0.999985	RPL24B	Ribosomal protein L30 of the large (60S) ribosomal subunit, nearly identical to Rpl24Ap and has similarity to rat L24 ribosomal protein; not essential for translation but may be required for normal translation rate
YOR207C	357.023	-0.182619	0.299881	0.933902	357.023	-0.881156	0.416183	0.995869	357.023	0.698537	0.512967	0.999985	RET1	Second-largest subunit of RNA polymerase III, which is responsible for the transcription of tRNA and 5S RNA genes, and other low molecular weight RNAs
YDR169C	33.2809	0.0528197	0.459932	0.994689	33.2809	0.585066	0.571507	0.995869	33.2809	-0.532246	0.733611	0.999985	STB3	Ribosomal RNA processing element (RRPE)-binding protein involved in the glucose-induced transition from quiescence to growth; restricted to nucleus in quiescent cells, released into cytoplasm after glucose repletion; binds Sin3p
YPR169W	91.8078	-0.677142	0.374739	0.519445	91.8078	-0.132754	0.501934	0.995869	91.8078	-0.544388	0.626388	0.999985	JIP5	Essential protein required for biogenesis of the large ribosomal subunit; interacts with proteins involved in RNA processing, ribosome biogenesis, ubiquitination and demethylation; similar to WDR55, a human WD repeat protein
YPL004C	592.59	0.696855	0.397616	0.548089	592.59	0.401574	0.511816	0.995869	592.59	0.29528	0.648115	0.999985	LSP1	Primary component of eisosomes, which are large immobile patch structures at the cell cortex associated with endocytosis, along with Pil1p and Sur7p; null mutants show activation of Pkc1p/Ypk1p stress resistance pathways
YGR085C	1599.72	-0.0993383	0.25968	0.98037	1599.72	-0.37705	0.361532	0.995869	1599.72	0.277711	0.445128	0.999985	RPL11B	Protein component of the large (60S) ribosomal subunit, nearly identical to Rpl11Ap; involved in ribosomal assembly; depletion causes degradation of proteins and RNA of the 60S subunit; has similarity to E. coli L5 and rat L11
YKR089C	112.277	0.141506	0.352108	0.979428	112.277	0.166188	0.467312	0.995869	112.277	-0.024682	0.585116	0.999985	TGL4	Multifunctional triacylglycerol lipase, steryl ester hydrolase, and Ca2+-independent phospholipase A2; catalyzes acyl-CoA dependent acylation of LPA to PA; required with Tgl3p for timely bud formation; phosphorylated and activated by Cdc28p
YPL105C	109.235	-0.123388	0.385549	0.984538	109.235	-0.161807	0.501209	0.995869	109.235	0.0384191	0.632342	0.999985	SYH1	Protein of unknown function that may interact with ribosomes, based on co-purification experiments; authentic, non-tagged protein is detected in highly purified mitochondria in high-throughput studies
YOR342C	49.8135	-0.536335	0.496372	0.820727	49.8135	-0.661062	0.587358	0.995869	49.8135	0.124728	0.76896	0.999985		Putative protein of unknown function; green fluorescent protein (GFP)-fusion protein localizes to the cytoplasm and the nucleus
YDL141W	83.5646	0.0141613	0.352356	0.997966	83.5646	0.0720425	0.486804	0.995869	83.5646	-0.0578811	0.600944	0.999985	BPL1	Biotin:apoprotein ligase, covalently modifies proteins with the addition of biotin, required for acetyl-CoA carboxylase (Acc1p) holoenzyme formation
YBL002W	277.922	0.17357	0.368682	0.955295	277.922	0.722137	0.492653	0.995869	277.922	-0.548567	0.615333	0.999985	HTB2	Histone H2B, core histone protein required for chromatin assembly and chromosome function; nearly identical to HTB1; Rad6p-Bre1p-Lge1p mediated ubiquitination regulates transcriptional activation, meiotic DSB formation and H3 methylation
YOR243C	199.558	-0.0762827	0.324262	0.986813	199.558	-0.545871	0.449738	0.995869	199.558	0.469588	0.554443	0.999985	PUS7	Pseudouridine synthase, catalyzes pseudouridylation at positions 35 and 56 in U2 snRNA, position 50 in 5S rRNA, position 13 in cytoplasmic tRNAs, and position 35 in pre-tRNA(Tyr); conserved in archaea, vertebrates, and some bacteria
YDR529C	76.1797	0.078215	0.504924	0.991029	76.1797	0.00495715	0.607751	0.995869	76.1797	0.0732578	0.790132	0.999985	QCR7	Subunit 7 of the ubiquinol cytochrome-c reductase complex, which is a component of the mitochondrial inner membrane electron transport chain; oriented facing the mitochondrial matrix; N-terminus appears to play a role in complex assembly
YGL160W	54.2581	-0.00177604	0.403555	0.998899	54.2581	0.350914	0.535173	0.995869	54.2581	-0.35269	0.670279	0.999985	AIM14	Protein with similarity to iron/copper reductases (FRE1-8), possibly involved in iron homeostasis; may interact with ribosomes; null mutant displays elevated frequency of mitochondrial genome loss
YCR009C	136.861	0.0436376	0.347072	0.994689	136.861	0.302301	0.471872	0.995869	136.861	-0.258663	0.585767	0.999985	RVS161	Amphiphysin-like lipid raft protein; interacts with Rvs167p and regulates polarization of the actin cytoskeleton, endocytosis, cell polarity, cell fusion and viability following starvation or osmotic stress
YKR100C	38.275	-0.247557	0.446135	0.940966	38.275	0.00549674	0.562332	0.995869	38.275	-0.253054	0.717811	0.999985	SKG1	Transmembrane protein with a role in cell wall polymer composition; localizes on the inner surface of the plasma membrane at the bud and in the daughter cell
YJL082W	86.5619	0.528725	0.408873	0.709921	86.5619	0.066859	0.532123	0.995869	86.5619	0.461866	0.671068	0.999985	IML2	Protein of unknown function; the authentic, non-tagged protein is detected in highly purified mitochondria in high-throughput studies
YKR001C	475.053	0.281016	0.28765	0.841273	475.053	0.122461	0.399151	0.995869	475.053	0.158554	0.492	0.999985	VPS1	Dynamin-like GTPase required for vacuolar sorting; also involved in actin cytoskeleton organization, endocytosis, late Golgi-retention of some proteins, regulation of peroxisome biogenesis
YLR024C	79.9748	0.0727869	0.394216	0.98971	79.9748	0.509953	0.507231	0.995869	79.9748	-0.437166	0.642415	0.999985	UBR2	Cytoplasmic ubiquitin-protein ligase (E3); required for ubiquitylation of Rpn4p; mediates formation of a Mub1p-Ubr2p-Rad6p complex
YPL242C	119.296	-2.30375	0.395723	1.99116e-06	119.296	-2.24838	0.508068	0.00635672	119.296	-0.055366	0.643841	0.999985	IQG1	Essential protein required for determination of budding pattern, promotes localization of axial markers Bud4p and Cdc12p and functionally interacts with Sec3p, localizes to the contractile ring during anaphase, member of the IQGAP family
YNL291C	58.1576	0.0761586	0.413846	0.98971	58.1576	-0.254682	0.538155	0.995869	58.1576	0.330841	0.678877	0.999985	MID1	N-glycosylated integral membrane protein of the ER membrane and plasma membrane, functions as a stretch-activated Ca2+-permeable cation channel required for Ca2+ influx stimulated by pheromone; interacts with Cch1p; forms an oligomer
YNR033W	75.369	-0.202448	0.397111	0.950944	75.369	-0.0547153	0.522458	0.995869	75.369	-0.147733	0.656246	0.999985	ABZ1	Para-aminobenzoate (PABA) synthase, has similarity to Escherichia coli PABA synthase components PabA and PabB; required for the synthesis of para-aminobenzoic acid, an important intermediate for folate and ubiquinone Q biosynthesis
YGL131C	35.1837	-1.24492	0.500203	0.205266	35.1837	-0.121603	0.589765	0.995869	35.1837	-1.12331	0.773302	0.999985	SNT2	DNA binding protein with similarity to the S. pombe Snt2 protein; computational analysis suggests a role in regulation of expression of genes encoding amine transporters
YOL139C	394.196	-0.119583	0.303455	0.979652	394.196	-0.325944	0.419795	0.995869	394.196	0.206361	0.517989	0.999985	CDC33	Cytoplasmic mRNA cap binding protein and translation initiation factor eIF4E; the eIF4E-cap complex is responsible for mediating cap-dependent mRNA translation via interactions with translation initiation factor eIF4G (Tif4631p or Tif4632p)
YHR071W	70.6075	-0.00577377	0.443894	0.997966	70.6075	1.237	0.546918	0.949382	70.6075	-1.24277	0.704407	0.999985	PCL5	Cyclin, interacts with and phosphorylated by Pho85p cyclin-dependent kinase (Cdk), induced by Gcn4p at level of transcription, specifically required for Gcn4p degradation, may be sensor of cellular protein biosynthetic capacity
YEL054C	1697.17	-0.238236	0.253696	0.847139	1697.17	0.188966	0.349194	0.995869	1697.17	-0.427202	0.431623	0.999985	RPL12A	Protein component of the large (60S) ribosomal subunit, nearly identical to Rpl12Bp; rpl12a rpl12b double mutant exhibits slow growth and slow translation; has similarity to E. coli L11 and rat L12 ribosomal proteins
YBR158W	56.8273	-0.683499	0.453392	0.629533	56.8273	-0.824027	0.540242	0.995869	56.8273	0.140528	0.705219	0.999985	AMN1	Protein required for daughter cell separation, multiple mitotic checkpoints, and chromosome stability; contains 12 degenerate leucine-rich repeat motifs; expression is induced by the Mitotic Exit Network (MEN)
YLR075W	6122.68	0.0505358	0.280708	0.98971	6122.68	0.0267664	0.379914	0.995869	6122.68	0.0237695	0.472368	0.999985	RPL10	Protein component of the large (60S) ribosomal subunit, responsible for joining the 40S and 60S subunits; regulates translation initiation; has similarity to rat L10 ribosomal protein and to members of the QM gene family
YLL019C	88.0916	0.630154	0.439471	0.651021	88.0916	0.125588	0.529607	0.995869	88.0916	0.504566	0.688197	0.999985	KNS1	Nonessential putative protein kinase of unknown cellular role; member of the LAMMER family of protein kinases, which are serine/threonine kinases also capable of phosphorylating tyrosine residues
YNL219C	145.643	-0.15937	0.368446	0.968184	145.643	-0.120268	0.494379	0.995869	145.643	-0.0391018	0.616573	0.999985	ALG9	Mannosyltransferase, involved in N-linked glycosylation; catalyzes the transfer of mannose from Dol-P-Man to lipid-linked oligosaccharides; mutation of the human ortholog causes type 1 congenital disorders of glycosylation
YDL213C	101.586	-0.58294	0.366191	0.600255	101.586	-0.926707	0.518678	0.995869	101.586	0.343767	0.63488	0.999985	NOP6	Putative RNA-binding protein implicated in ribosome biogenesis; contains an RNA recognition motif (RRM) and has similarity to hydrophilins; NOP6 may be a fungal-specific gene as no homologs have been yet identified in higher eukaryotes
YFL013C	70.3226	0.274479	0.375721	0.903452	70.3226	-0.727439	0.508218	0.995869	70.3226	1.00192	0.63202	0.999985	IES1	Subunit of the INO80 chromatin remodeling complex
YGL056C	93.8887	-0.165725	0.366877	0.961726	93.8887	0.0517681	0.497825	0.995869	93.8887	-0.217493	0.618408	0.999985	SDS23	One of two S. cerevisiae homologs (Sds23p and Sds24p) of the S. pombe Sds23 protein, which is implicated in APC/cyclosome regulation; involved in cell separation during budding
YGR191W	158.245	-0.196305	0.340624	0.940196	158.245	-0.129211	0.471842	0.995869	158.245	-0.0670947	0.581944	0.999985	HIP1	High-affinity histidine permease, also involved in the transport of manganese ions
YLR435W	131.752	-0.682336	0.340899	0.402863	131.752	-0.313935	0.515789	0.995869	131.752	-0.368401	0.618241	0.999985	TSR2	Protein with a potential role in pre-rRNA processing
YKL179C	94.9181	-0.0296258	0.355141	0.9961	94.9181	-0.187869	0.475616	0.995869	94.9181	0.158243	0.593577	0.999985	COY1	Golgi membrane protein with similarity to mammalian CASP; genetic interactions with GOS1 (encoding a Golgi snare protein) suggest a role in Golgi function
YBR279W	116.768	-0.141408	0.347068	0.979013	116.768	0.0561807	0.475034	0.995869	116.768	-0.197589	0.588315	0.999985	PAF1	Component of the Paf1p complex that binds to and modulates the activity of RNA polymerases I and II; required for expression of a subset of genes, including cell cycle-regulated genes; homolog of human PD2/hPAF1
YDL055C	2256.33	0.768565	0.239885	0.0434304	2256.33	0.805139	0.332274	0.801995	2256.33	-0.0365747	0.409818	0.999985	PSA1	GDP-mannose pyrophosphorylase (mannose-1-phosphate guanyltransferase), synthesizes GDP-mannose from GTP and mannose-1-phosphate in cell wall biosynthesis; required for normal cell wall structure
YBL017C	342.754	-0.0144182	0.308278	0.997966	342.754	-0.325636	0.418263	0.995869	342.754	0.311218	0.519595	0.999985	PEP1	Type I transmembrane sorting receptor for multiple vacuolar hydrolases; cycles between the late-Golgi and prevacuolar endosome-like compartments
YIL094C	185.876	-0.0899853	0.305999	0.984538	185.876	0.0183614	0.427684	0.995869	185.876	-0.108347	0.52588	0.999985	LYS12	Homo-isocitrate dehydrogenase, an NAD-linked mitochondrial enzyme required for the fourth step in the biosynthesis of lysine, in which homo-isocitrate is oxidatively decarboxylated to alpha-ketoadipate
YMR276W	411.136	-0.0434328	0.286477	0.991029	411.136	0.635326	0.401639	0.995869	411.136	-0.678759	0.493339	0.999985	DSK2	Nuclear-enriched ubiquitin-like polyubiquitin-binding protein, required for spindle pole body (SPB) duplication and for transit through the G2/M phase of the cell cycle, involved in proteolysis, interacts with the proteasome
YOR230W	367.356	0.421295	0.29872	0.661389	367.356	0.194253	0.413276	0.995869	367.356	0.227043	0.509932	0.999985	WTM1	Transcriptional modulator involved in regulation of meiosis, silencing, and expression of RNR genes; required for nuclear localization of the ribonucleotide reductase small subunit Rnr2p and Rnr4p; contains WD repeats
YJL178C	128.396	-0.0531094	0.339144	0.991029	128.396	0.088495	0.475349	0.995869	128.396	-0.141604	0.583932	0.999985	ATG27	Type I membrane protein involved in autophagy and the cytoplasm-to-vacuole targeting (Cvt) pathway; may be involved in membrane delivery to the phagophore assembly site
YML018C	46.5594	-0.589619	0.480236	0.743546	46.5594	-0.226642	0.5954	0.995869	46.5594	-0.362977	0.764924	0.999985		Putative protein of unknown function; green fluorescent protein (GFP)-fusion protein localizes to the membrane of the vacuole; physical interaction with Atg27p suggests a possible role in autophagy; YML018C is not an essential gene
YDR170W-A	227.271	0.527524	0.334765	0.613249	227.271	0.0725979	0.443634	0.995869	227.271	0.454926	0.555768	0.999985		Retrotransposon TYA Gag gene; Gag is a nucleocapsid protein that is the structural constituent of virus-like particles (VLPs); similar to retroviral Gag; YDR170W-A is part of a mutant retrotransposon
YLR332W	72.9846	-0.0387223	0.465158	0.9961	72.9846	0.214632	0.581524	0.995869	72.9846	-0.253355	0.744679	0.999985	MID2	O-glycosylated plasma membrane protein that acts as a sensor for cell wall integrity signaling and activates the pathway; interacts with Rom2p, a guanine nucleotide exchange factor for Rho1p, and with cell integrity pathway protein Zeo1p
YDR138W	75.3737	-0.417128	0.391853	0.82201	75.3737	0.0233822	0.513401	0.995869	75.3737	-0.44051	0.645856	0.999985	HPR1	Subunit of THO/TREX complexes that couple transcription elongation with mitotic recombination and with mRNA metabolism and export, subunit of an RNA Pol II complex; regulates lifespan; involved in telomere maintenance; similar to Top1p
YMR012W	909.422	0.0332827	0.283379	0.994689	909.422	0.0925652	0.385976	0.995869	909.422	-0.0592824	0.478833	0.999985	CLU1	eIF3 component of unknown function; deletion causes defects in mitochondrial organization but not in growth or translation initiation, can rescue cytokinesis and mitochondrial organization defects of the Dictyostelium cluA- mutant
YKL197C	49.9826	-0.00582563	0.42705	0.997966	49.9826	-0.18852	0.548587	0.995869	49.9826	0.182695	0.695207	0.999985	PEX1	AAA-peroxin that heterodimerizes with AAA-peroxin Pex6p and participates in the recycling of peroxisomal signal receptor Pex5p from the peroxisomal membrane to the cystosol; induced by oleic acid and upregulated during anaerobiosis
YBL035C	50.679	1.26265	0.481979	0.165004	50.679	0.416511	0.596345	0.995869	50.679	0.846137	0.766737	0.999985	POL12	B subunit of DNA polymerase alpha-primase complex, required for initiation of DNA replication during mitotic and premeiotic DNA synthesis; also functions in telomere capping and length regulation
YIR016W	23.1915	0.699801	0.623026	0.802954	23.1915	0.23293	0.645034	0.995869	23.1915	0.46687	0.896784	0.999985		Putative protein of unknown function; expression directly regulated by the metabolic and meiotic transcriptional regulator Ume6p; overexpression causes a cell cycle delay or arrest; YIR016W is a non-essential gene
YPR063C	105.693	0.24281	0.40791	0.936529	105.693	0.478063	0.534541	0.995869	105.693	-0.235253	0.672403	0.999985		ER-localized protein of unknown function
YDR291W	70.8038	0.369232	0.393607	0.847139	70.8038	-0.511287	0.512972	0.995869	70.8038	0.880519	0.646582	0.999985	HRQ1	Putative RecQ helicase; belongs to the widely conserved RecQ family of proteins which are involved in maintaining genomic integrity; similar to the human RecQ4p implicated in Rothmund-Thomson syndrome(RTS)
YGR090W	296.613	-0.178767	0.306714	0.940196	296.613	-0.576215	0.418397	0.995869	296.613	0.397448	0.518776	0.999985	UTP22	Possible U3 snoRNP protein involved in maturation of pre-18S rRNA, based on computational analysis of large-scale protein-protein interaction data
YDL231C	35.3556	0.529422	0.566663	0.848304	35.3556	-0.256043	0.594699	0.995869	35.3556	0.785465	0.821462	0.999985	BRE4	Zinc finger protein containing five transmembrane domains; null mutant exhibits strongly fragmented vacuoles and sensitivity to brefeldin A, a drug which is known to affect intracellular transport
YJL196C	264.877	0.120671	0.317799	0.980921	264.877	0.592753	0.438701	0.995869	264.877	-0.472082	0.541715	0.999985	ELO1	Elongase I, medium-chain acyl elongase, catalyzes carboxy-terminal elongation of unsaturated C12-C16 fatty acyl-CoAs to C16-C18 fatty acids
YLR299W	112.707	0.491336	0.37378	0.693162	112.707	0.333416	0.501663	0.995869	112.707	0.15792	0.625601	0.999985	ECM38	Gamma-glutamyltranspeptidase, major glutathione-degrading enzyme; involved in detoxification of electrophilic xenobiotics; expression induced mainly by nitrogen starvation
YLR057W	68.2638	-1.37354	0.423818	0.0398299	68.2638	-0.928483	0.534715	0.995869	68.2638	-0.445055	0.682193	0.999985		Putative protein of unknown function; YLR050W is not an essential gene
YCR094W	51.0205	-0.333371	0.465269	0.903452	51.0205	-0.273231	0.585144	0.995869	51.0205	-0.06014	0.747566	0.999985	CDC50	Endosomal protein that interacts with phospholipid flippase Drs2p; interaction with Cdc50p is essential for Drs2p catalytic activity; mutations affect cell polarity and polarized growth; similar to Ynr048wp and Lem3p
YFR019W	116.193	0.0546268	0.361357	0.991029	116.193	-0.289091	0.475137	0.995869	116.193	0.343718	0.596936	0.999985	FAB1	1-phosphatidylinositol-3-phosphate 5-kinase; vacuolar membrane kinase that generates phosphatidylinositol (3,5)P2, which is involved in vacuolar sorting and homeostasis
YDR093W	267.166	0.34431	0.328498	0.824259	267.166	0.0948903	0.44117	0.995869	267.166	0.24942	0.550038	0.999985	DNF2	Aminophospholipid translocase (flippase) that localizes primarily to the plasma membrane; contributes to endocytosis, protein transport and cell polarity; type 4 P-type ATPase
YDL198C	118.359	0.242124	0.337013	0.903452	118.359	0.235043	0.482058	0.995869	118.359	0.00708106	0.588182	0.999985	GGC1	Mitochondrial GTP/GDP transporter, essential for mitochondrial genome maintenance; has a role in mitochondrial iron transport; member of the mitochondrial carrier family
YPL231W	3053.23	0.0891505	0.241974	0.981235	3053.23	-0.127108	0.333659	0.995869	3053.23	0.216258	0.412164	0.999985	FAS2	Alpha subunit of fatty acid synthetase, which catalyzes the synthesis of long-chain saturated fatty acids; contains the acyl-carrier protein domain and beta-ketoacyl reductase, beta-ketoacyl synthase and self-pantetheinylation activities
YAL036C	216.431	-0.135434	0.347386	0.979652	216.431	-0.467591	0.484419	0.995869	216.431	0.332157	0.596101	0.999985	RBG1	Member of the DRG family of GTP-binding proteins; associates with translating ribosomes; interacts with Tma46p, Ygr250cp, Gir2p and Yap1p via two-hybrid
YLR417W	37.1468	-0.012995	0.480132	0.997966	37.1468	0.241884	0.586927	0.995869	37.1468	-0.254879	0.758304	0.999985	VPS36	Component of the ESCRT-II complex; contains the GLUE (GRAM Like Ubiquitin binding in EAP45) domain which is involved in interactions with ESCRT-I and ubiquitin-dependent sorting of proteins into the endosome
YKR050W	31.5074	0.859169	0.58528	0.646744	31.5074	-0.266302	0.6289	0.995869	31.5074	1.12547	0.859133	0.999985	TRK2	Component of the Trk1p-Trk2p potassium transport system
YHR170W	308.522	-0.591082	0.304335	0.432873	308.522	-0.725642	0.430623	0.995869	308.522	0.134561	0.527305	0.999985	NMD3	Protein involved in nuclear export of the large ribosomal subunit; acts as a Crm1p-dependent adapter protein for export of nascent ribosomal subunits through the nuclear pore complex
YDL077C	55.764	-0.450454	0.422943	0.82201	55.764	0.156303	0.547606	0.995869	55.764	-0.606756	0.691926	0.999985	VAM6	Vacuolar protein that plays a critical role in the tethering steps of vacuolar membrane fusion by facilitating guanine nucleotide exchange on small guanosine triphosphatase Ypt7p
YDL110C	130.626	0.738035	0.451104	0.588014	130.626	0.604267	0.571444	0.995869	130.626	0.133768	0.728039	0.999985	TMA17	Protein of unknown function that associates with ribosomes; heterozygous deletion demonstrated increases in chromosome instability in a rad9 deletion background; protein abundance is decreased upon intracellular iron depletion
YOR212W	111.429	0.0468056	0.352971	0.994327	111.429	0.124234	0.472784	0.995869	111.429	-0.0774285	0.590012	0.999985	STE4	G protein beta subunit, forms a dimer with Ste18p to activate the mating signaling pathway, forms a heterotrimer with Gpa1p and Ste18p to dampen signaling; may recruit Rho1p to the polarized growth site during mating; contains WD40 repeats
YJL079C	185.726	-0.686637	0.416386	0.586509	185.726	-0.958192	0.53488	0.995869	185.726	0.271555	0.67784	0.999985	PRY1	Protein of unknown function
YMR223W	31.2845	-0.330707	0.520311	0.925622	31.2845	-0.477601	0.618798	0.995869	31.2845	0.146893	0.808453	0.999985	UBP8	Ubiquitin-specific protease that is a component of the SAGA (Spt-Ada-Gcn5-Acetyltransferase) acetylation complex; required for SAGA-mediated deubiquitination of histone H2B
YNR044W	45.7149	0.31602	0.475081	0.918407	45.7149	0.0745277	0.585003	0.995869	45.7149	0.241492	0.753612	0.999985	AGA1	Anchorage subunit of a-agglutinin of a-cells, highly O-glycosylated protein with N-terminal secretion signal and C-terminal signal for addition of GPI anchor to cell wall, linked to adhesion subunit Aga2p via two disulfide bonds
YKL186C	40.0209	-0.527969	0.454368	0.791559	40.0209	-0.22162	0.571529	0.995869	40.0209	-0.306348	0.730119	0.999985	MTR2	mRNA transport regulator, essential nuclear protein; Mex67p and Mtr2p form a mRNA export complex which binds to RNA
YLR301W	189.925	0.120862	0.296194	0.979013	189.925	0.114041	0.429652	0.995869	189.925	0.00682046	0.521854	0.999985		Protein of unknown function that interacts with Sec72p
YMR194W	393.865	-0.30096	0.303367	0.839067	393.865	-0.543366	0.423453	0.995869	393.865	0.242406	0.520905	0.999985	RPL36A	N-terminally acetylated protein component of the large (60S) ribosomal subunit, nearly identical to Rpl36Bp and has similarity to rat L36 ribosomal protein; binds to 5.8 S rRNA
YGL003C	32.7577	0.0229808	0.496458	0.997966	32.7577	0.666528	0.595789	0.995869	32.7577	-0.643547	0.775541	0.999985	CDH1	Cell-cycle regulated activator of the anaphase-promoting complex/cyclosome (APC/C), which directs ubiquitination of cyclins resulting in mitotic exit; targets the APC/C to specific substrates including Cdc20p, Ase1p, Cin8p and Fin1p
YDR208W	85.3163	-0.551166	0.359763	0.626564	85.3163	-0.319244	0.473729	0.995869	85.3163	-0.231922	0.594841	0.999985	MSS4	Phosphatidylinositol-4-phosphate 5-kinase, involved in actin cytoskeleton organization and cell morphogenesis; multicopy suppressor of stt4 mutation
YHR143W	41.2814	-0.264559	0.547936	0.952862	41.2814	0.311181	0.632648	0.995869	41.2814	-0.57574	0.836952	0.999985	DSE2	Daughter cell-specific secreted protein with similarity to glucanases, degrades cell wall from the daughter side causing daughter to separate from mother; expression is repressed by cAMP
YHR042W	460.537	-0.0152702	0.262873	0.997417	460.537	-0.127421	0.367851	0.995869	460.537	0.11215	0.452124	0.999985	NCP1	NADP-cytochrome P450 reductase; involved in ergosterol biosynthesis; associated and coordinately regulated with Erg11p
YHR204W	52.9843	0.316403	0.429003	0.903452	52.9843	0.246993	0.541002	0.995869	52.9843	0.0694104	0.690454	0.999985	MNL1	alpha-1,2-specific exomannosidase of the endoplasmic reticulum that generates a Man7GlcNac2 oligosaccharide signal on glycoproteins destined for ubiquitin-proteasome degradation
YDR280W	63.1434	-0.217375	0.423593	0.949667	63.1434	-0.710893	0.545541	0.995869	63.1434	0.493519	0.690667	0.999985	RRP45	Exosome non-catalytic core component; involved in 3'-5' RNA processing and degradation in both the nucleus and the cytoplasm; has similarity to E. coli RNase PH and to human hRrp45p (PM/SCL-75, EXOSC9)
YBR286W	1330.37	0.367494	0.262481	0.664802	1330.37	0.276697	0.36132	0.995869	1330.37	0.0907968	0.446596	0.999985	APE3	Vacuolar aminopeptidase Y, processed to mature form by Prb1p
YBR149W	386.597	1.13883	0.292384	0.00627846	386.597	0.902929	0.40721	0.979651	386.597	0.235906	0.501305	0.999985	ARA1	NADP+ dependent arabinose dehydrogenase, involved in carbohydrate metabolism; purified as homodimer; naturally occurs with a N-terminus degradation product
YJR040W	91.903	0.454256	0.370996	0.743636	91.903	0.413457	0.500329	0.995869	91.903	0.040799	0.622869	0.999985	GEF1	Voltage-gated chloride channel localized to the golgi, the endosomal system, and plasma membrane, and involved in cation homeostasis; highly homologous to vertebrate voltage-gated chloride channels
YPL022W	65.9651	0.128831	0.404308	0.984538	65.9651	0.309898	0.519659	0.995869	65.9651	-0.181067	0.658419	0.999985	RAD1	Single-stranded DNA endonuclease (with Rad10p), cleaves single-stranded DNA during nucleotide excision repair and double-strand break repair; subunit of Nucleotide Excision Repair Factor 1 (NEF1); homolog of human XPF protein
YPL220W	3265.44	0.0707821	0.245928	0.984538	3265.44	0.103788	0.338285	0.995869	3265.44	-0.0330054	0.418231	0.999985	RPL1A	N-terminally acetylated protein component of the large (60S) ribosomal subunit, nearly identical to Rpl1Bp and has similarity to E. coli L1 and rat L10a ribosomal proteins; rpl1a rpl1b double null mutation is lethal
YGL201C	110.013	-0.760743	0.389309	0.425886	110.013	-0.857674	0.513406	0.995869	110.013	0.096931	0.644302	0.999985	MCM6	Protein involved in DNA replication; component of the Mcm2-7 hexameric complex that binds chromatin as a part of the pre-replicative complex
YCL043C	1704.85	0.514967	0.273664	0.463729	1704.85	0.450991	0.373472	0.995869	1704.85	0.063976	0.463005	0.999985	PDI1	Protein disulfide isomerase, multifunctional protein resident in the endoplasmic reticulum lumen, essential for the formation of disulfide bonds in secretory and cell-surface proteins, unscrambles non-native disulfide bonds
YJR105W	769.873	-0.00124725	0.260528	0.998899	769.873	0.0680267	0.3629	0.995869	769.873	-0.0692739	0.446734	0.999985	ADO1	Adenosine kinase, required for the utilization of S-adenosylmethionine (AdoMet); may be involved in recycling adenosine produced through the methyl cycle
YAL005C	10546.5	0.675075	0.281167	0.225474	10546.5	0.41504	0.379597	0.995869	10546.5	0.260034	0.472386	0.999985	SSA1	ATPase involved in protein folding and nuclear localization signal (NLS)-directed nuclear transport; member of heat shock protein 70 (HSP70) family; forms a chaperone complex with Ydj1p; localized to the nucleus, cytoplasm, and cell wall
YDL167C	92.67	-0.930667	0.387531	0.225474	92.67	-0.791956	0.509692	0.995869	92.67	-0.138711	0.640251	0.999985	NRP1	Putative RNA binding protein of unknown function; localizes to stress granules induced by glucose deprivation; predicted to be involved in ribosome biogenesis
YHR006W	67.7295	0.149136	0.418765	0.983432	67.7295	-0.355891	0.527589	0.995869	67.7295	0.505027	0.67358	0.999985	STP2	Transcription factor, activated by proteolytic processing in response to signals from the SPS sensor system for external amino acids; activates transcription of amino acid permease genes
YKR027W	34.0117	0.3989	0.463534	0.876617	34.0117	0.0668904	0.575604	0.995869	34.0117	0.332009	0.739042	0.999985	BCH2	Member of the ChAPs family of proteins (Chs5p-Arf1p-binding proteins: Bch1p, Bch2p, Bud7p, Chs6p), that forms the exomer complex with Chs5p to mediate export of specific cargo proteins, including Chs3p, from the Golgi to the plasma membrane
YEL001C	137.462	0.04146	0.32766	0.994689	137.462	-0.141279	0.460066	0.995869	137.462	0.182739	0.56482	0.999985	IRC22	Putative protein of unknown function; green fluorescent protein (GFP)-fusion localizes to the ER; YEL001C is non-essential; null mutant displays increased levels of spontaneous Rad52p foci
YIL085C	75.1515	-0.242665	0.445222	0.944403	75.1515	-0.111337	0.557771	0.995869	75.1515	-0.131328	0.713673	0.999985	KTR7	Putative mannosyltransferase involved in protein glycosylation; member of the KRE2/MNT1 mannosyltransferase family
YBR084W	406.443	-0.0298464	0.27366	0.994831	406.443	-0.0762711	0.381002	0.995869	406.443	0.0464248	0.469098	0.999985	MIS1	Mitochondrial C1-tetrahydrofolate synthase, involved in interconversion between different oxidation states of tetrahydrofolate (THF); provides activities of formyl-THF synthetase, methenyl-THF cyclohydrolase, and methylene-THF dehydrogenase
YLR345W	39.9278	0.728435	0.45636	0.600047	39.9278	0.101691	0.56721	0.995869	39.9278	0.626744	0.728003	0.999985		Similar to 6-phosphofructo-2-kinase/fructose-2,6-bisphosphatase enzymes responsible for the metabolism of fructoso-2,6-bisphosphate; mRNA expression is repressed by the Rfx1p-Tup1p-Ssn6p repressor complex; YLR345W is not an essential gene
YJL068C	107.597	0.354274	0.384466	0.854944	107.597	0.815373	0.527262	0.995869	107.597	-0.4611	0.652548	0.999985		Non-essential intracellular esterase that can function as an S-formylglutathione hydrolase; may be involved in the detoxification of formaldehyde, which can be metabolized to S-formylglutathione; similar to human esterase D
YMR267W	35.0172	0.331588	0.467749	0.906418	35.0172	-0.151774	0.584281	0.995869	35.0172	0.483361	0.748447	0.999985	PPA2	Mitochondrial inorganic pyrophosphatase, required for mitochondrial function and possibly involved in energy generation from inorganic pyrophosphate
YOR001W	122.081	-0.329523	0.334363	0.840489	122.081	-0.130166	0.457001	0.995869	122.081	-0.199356	0.566256	0.999985	RRP6	Nuclear exosome exonuclease component; has 3'-5' exonuclease activity; involved in RNA processing, maturation, surveillance, degradation, tethering, and export; has similarity to E. coli RNase D and to human PM-Sc1 100 (EXOSC10)
YNL183C	52.5137	0.408795	0.404444	0.83248	52.5137	-0.145572	0.528021	0.995869	52.5137	0.554367	0.665118	0.999985	NPR1	Protein kinase that stabilizes several plasma membrane amino acid transporters by antagonizing their ubiquitin-mediated degradation
YGR108W	124.414	-1.66842	0.394801	0.0019551	124.414	-1.51806	0.509679	0.342636	124.414	-0.150365	0.644658	0.999985	CLB1	B-type cyclin involved in cell cycle progression; activates Cdc28p to promote the transition from G2 to M phase; accumulates during G2 and M, then targeted via a destruction box motif for ubiquitin-mediated degradation by the proteasome
YDL145C	1058.05	0.305791	0.271077	0.802954	1058.05	0.176168	0.371087	0.995869	1058.05	0.129623	0.459552	0.999985	COP1	Alpha subunit of COPI vesicle coatomer complex, which surrounds transport vesicles in the early secretory pathway
YJL187C	61.219	0.99573	0.440205	0.281122	61.219	0.169308	0.54626	0.995869	61.219	0.826422	0.701548	0.999985	SWE1	Protein kinase that regulates the G2/M transition by inhibition of Cdc28p kinase activity; localizes to the nucleus and to the daughter side of the mother-bud neck; homolog of S. pombe Wee1p; potential Cdc28p substrate
YGL065C	94.1003	0.163812	0.340643	0.952862	94.1003	-0.346248	0.492159	0.995869	94.1003	0.51006	0.598544	0.999985	ALG2	Mannosyltransferase that catalyzes two consecutive steps in the N-linked glycosylation pathway; alg2 mutants exhibit temperature-sensitive growth and abnormal accumulation of the lipid-linked oligosaccharide Man2GlcNAc2-PP-Dol
YCL061C	52.4741	0.840268	0.449871	0.475425	52.4741	0.0330194	0.565152	0.995869	52.4741	0.807248	0.722343	0.999985	MRC1	S-phase checkpoint protein required for DNA replication; interacts with and stabilizes Pol2p at stalled replication forks during stress, where it forms a pausing complex with Tof1p and is phosphorylated by Mec1p; protects uncapped telomeres
YFL002C	67.3088	-0.714693	0.384423	0.479479	67.3088	-0.689826	0.519287	0.995869	67.3088	-0.0248666	0.646056	0.999985	SPB4	Putative ATP-dependent RNA helicase, nucleolar protein required for synthesis of 60S ribosomal subunits at a late step in the pathway; sediments with 66S pre-ribosomes in sucrose gradients
YPL101W	59.6257	-0.312739	0.393171	0.88906	59.6257	-0.424906	0.553091	0.995869	59.6257	0.112167	0.678571	0.999985	ELP4	Subunit of Elongator complex, which is required for modification of wobble nucleosides in tRNA; required for Elongator structural integrity
YOR346W	56.1497	-0.878639	0.417757	0.344925	56.1497	-0.861288	0.536264	0.995869	56.1497	-0.0173507	0.679697	0.999985	REV1	Deoxycytidyl transferase, forms a complex with the subunits of DNA polymerase zeta, Rev3p and Rev7p; involved in repair of abasic sites in damaged DNA
YOR188W	95.6154	-0.384066	0.380846	0.83248	95.6154	-0.557435	0.503182	0.995869	95.6154	0.173369	0.631047	0.999985	MSB1	Protein involved in positive regulation of both 1,3-beta-glucan synthesis and the Pkc1p-MAPK pathway, potential Cdc28p substrate; multicopy suppressor of temperature-sensitive mutations in CDC24 and CDC42, and of mutations in BEM4
YOR247W	363.337	0.0100946	0.323837	0.997966	363.337	-0.261131	0.437492	0.995869	363.337	0.271225	0.544307	0.999985	SRL1	Mannoprotein that exhibits a tight association with the cell wall, required for cell wall stability in the absence of GPI-anchored mannoproteins; has a high serine-threonine content; expression is induced in cell wall mutants
YLR424W	37.2042	0.0275942	0.482814	0.997417	37.2042	-0.0361371	0.595791	0.995869	37.2042	0.0637312	0.76686	0.999985	SPP382	Essential protein that forms a dimer with Ntr2p; also forms a trimer, with Ntr2p and Prp43p, that is involved in spliceosome disassembly; found also in a multisubunit complex with the splicing factor Clf1p; suppressor of prp38-1 mutation
YGL120C	311.021	-0.345688	0.294845	0.785103	311.021	-0.165979	0.414651	0.995869	311.021	-0.179708	0.508791	0.999985	PRP43	RNA helicase in the DEAH-box family, functions in both RNA polymerase I and polymerase II transcript metabolism, involved in release of the lariat-intron from the spliceosome
YDL088C	36.2596	-0.0750942	0.469319	0.990857	36.2596	-0.246874	0.574384	0.995869	36.2596	0.17178	0.741731	0.999985	ASM4	Nuclear pore complex subunit, part of a subcomplex also containing Nup53p, Nup170p, and Pse1p
YNL280C	108.323	0.0744427	0.343671	0.98971	108.323	0.282334	0.479706	0.995869	108.323	-0.207891	0.59011	0.999985	ERG24	C-14 sterol reductase, acts in ergosterol biosynthesis; mutants accumulate the abnormal sterol ignosterol (ergosta-8,14 dienol), and are viable under anaerobic growth conditions but inviable on rich medium under aerobic conditions
YDL101C	54.8799	1.78926	0.423744	0.0019551	54.8799	1.34683	0.544194	0.731786	54.8799	0.442425	0.689588	0.999985	DUN1	Cell-cycle checkpoint serine-threonine kinase required for DNA damage-induced transcription of certain target genes, phosphorylation of Rad55p and Sml1p, and transient G2/M arrest after DNA damage; also regulates postreplicative DNA repair
YBL042C	52.6359	-0.651849	0.457406	0.651021	52.6359	0.0441605	0.585362	0.995869	52.6359	-0.69601	0.742881	0.999985	FUI1	High affinity uridine permease, localizes to the plasma membrane; also mediates low but significant transport of the cytotoxic nucleoside analog 5-fluorouridine; not involved in uracil transport
YLR064W	38.0587	-0.158466	0.469044	0.984538	38.0587	0.145213	0.587909	0.995869	38.0587	-0.303679	0.752095	0.999985	PER33	Putative protein of unknown function; localizes to the endoplasmic reticulum with some nuclear pore complex association; highly conserved across species, orthologous to human TMEM33 and paralogous to Per33p; YLR064W is not an essential gene
YBR150C	34.1269	0.0511469	0.464483	0.994831	34.1269	-0.294273	0.585604	0.995869	34.1269	0.34542	0.747435	0.999985	TBS1	Putative protein of unknown function; the authentic, non-tagged protein is detected in highly purified mitochondria in high-throughput studies
YLL011W	126.548	-0.681325	0.424512	0.595772	126.548	0.00528199	0.55341	0.995869	126.548	-0.686607	0.697476	0.999985	SOF1	Essential protein required for biogenesis of 40S (small) ribosomal subunit; has similarity to the beta subunit of trimeric G-proteins and the splicing factor Prp4p
YJL053W	38.3645	-0.604945	0.448795	0.676098	38.3645	-0.0924691	0.573948	0.995869	38.3645	-0.512475	0.728577	0.999985	PEP8	Vacuolar protein sorting protein that forms part of the multimeric membrane-associated retromer complex along with Vps35p, Vps29p, Vps17p, and Vps5p; essential for endosome-to-Golgi retrograde protein transport
YGL092W	198.604	-0.372464	0.293619	0.718049	198.604	-0.936626	0.408129	0.927211	198.604	0.564162	0.502767	0.999985	NUP145	Essential nucleoporin, catalyzes its own cleavage in vivo to generate a C-terminal fragment that assembles into the Nup84p subcomplex of the nuclear pore complex, and an N-terminal fragment of unknown function that is homologous to Nup100p
YGR274C	80.2358	-0.1206	0.359478	0.984538	80.2358	-0.579554	0.491328	0.995869	80.2358	0.458954	0.60878	0.999985	TAF1	TFIID subunit (145 kDa), involved in RNA polymerase II transcription initiation; possesses in vitro histone acetyltransferase activity but its role in vivo appears to be minor; involved in promoter binding and G1/S progression
YPR031W	34.1784	-0.0457252	0.46782	0.995084	34.1784	-0.284818	0.579458	0.995869	34.1784	0.239093	0.744717	0.999985	NTO1	Subunit of the NuA3 histone acetyltransferase complex that acetylates histone H3; contains PHD finger domain that interacts with methylated histone H3
YHR079C	50.0096	0.136105	0.437124	0.984538	50.0096	-0.546882	0.545217	0.995869	50.0096	0.682987	0.698805	0.999985	IRE1	Serine-threonine kinase and endoribonuclease; transmembrane protein that mediates the unfolded protein response (UPR) by regulating Hac1p synthesis through HAC1 mRNA splicing; Kar2p binds inactive Ire1p and releases from it upon ER stress
YAL058W	49.5015	0.0818319	0.411352	0.98971	49.5015	0.508852	0.552462	0.995869	49.5015	-0.42702	0.688795	0.999985	CNE1	Calnexin; integral membrane ER chaperone involved in folding and quality control of glycoproteins; chaperone activity is inhibited by Mpd1p, with which Cne1p interacts; 24% identical to mammalian calnexin; Ca+ binding not yet shown in yeast
YCR072C	112.525	-0.63568	0.408992	0.623582	112.525	-0.524408	0.541385	0.995869	112.525	-0.111273	0.678493	0.999985	RSA4	WD-repeat protein involved in ribosome biogenesis; may interact with ribosomes; required for maturation and efficient intra-nuclear transport or pre-60S ribosomal subunits, localizes to the nucleolus
YGL139W	108.417	-0.31673	0.376351	0.88558	108.417	0.367549	0.508797	0.995869	108.417	-0.684279	0.632868	0.999985	FLC3	Putative FAD transporter, similar to Flc1p and Flc2p; localized to the ER
YMR038C	142.813	-0.0876461	0.332607	0.984538	142.813	-0.250371	0.471607	0.995869	142.813	0.162725	0.577095	0.999985	CCS1	Copper chaperone for superoxide dismutase Sod1p, involved in oxidative stress protection; Met-X-Cys-X2-Cys motif within the N-terminal portion is involved in insertion of copper into Sod1p under conditions of copper deprivation
YJL134W	72.9477	0.0406522	0.373451	0.994831	72.9477	-0.0918192	0.509844	0.995869	72.9477	0.132471	0.631985	0.999985	LCB3	Long-chain base-1-phosphate phosphatase with specificity for dihydrosphingosine-1-phosphate, regulates ceramide and long-chain base phosphates levels, involved in incorporation of exogenous long chain bases in sphingolipids
YDR310C	121.499	0.074543	0.33418	0.989149	121.499	-0.0647235	0.448796	0.995869	121.499	0.139266	0.559548	0.999985	SUM1	Transcriptional repressor required for mitotic repression of middle sporulation-specific genes; also acts as general replication initiation factor; involved in telomere maintenance, chromatin silencing; regulated by pachytene checkpoint
YHL015W	1049.02	-0.0228733	0.254316	0.995495	1049.02	0.194425	0.352487	0.995869	1049.02	-0.217298	0.434653	0.999985	RPS20	Protein component of the small (40S) ribosomal subunit; overproduction suppresses mutations affecting RNA polymerase III-dependent transcription; has similarity to E. coli S10 and rat S20 ribosomal proteins
YMR319C	69.6344	-0.125366	0.421977	0.984538	69.6344	0.305598	0.538566	0.995869	69.6344	-0.430963	0.684195	0.999985	FET4	Low-affinity Fe(II) transporter of the plasma membrane
YHR203C	2910.4	0.594615	0.406872	0.646744	2910.4	0.237069	0.51839	0.995869	2910.4	0.357546	0.658994	0.999985	RPS4B	Protein component of the small (40S) ribosomal subunit; identical to Rps4Ap and has similarity to rat S4 ribosomal protein
YNL299W	43.9318	-0.899244	0.448396	0.400314	43.9318	-0.760006	0.571065	0.995869	43.9318	-0.139238	0.725979	0.999985	TRF5	Non-canonical poly(A) polymerase, involved in nuclear RNA degradation as a component of the TRAMP complex; catalyzes polyadenylation of hypomodified tRNAs, and snoRNA and rRNA precursors; overlapping but non-redundant functions with Pap2p
YFR033C	182.907	0.469529	0.440074	0.82201	182.907	-0.149719	0.557192	0.995869	182.907	0.619248	0.71002	0.999985	QCR6	Subunit 6 of the ubiquinol cytochrome-c reductase complex, which is a component of the mitochondrial inner membrane electron transport chain; highly acidic protein; required for maturation of cytochrome c1
YLR035C-A	213.578	0.483216	0.370521	0.700188	213.578	-0.11527	0.470922	0.995869	213.578	0.598486	0.599211	0.999985		Retrotransposon TYA Gag and TYB Pol genes; polyprotein is processed to make a nucleocapsid-like protein (Gag), reverse transcriptase (RT), protease (PR), and integrase (IN); YLR035C-A is part of a mutant retrotransposon
YLR039C	80.0315	0.0585707	0.410839	0.993225	80.0315	-0.169357	0.529613	0.995869	80.0315	0.227927	0.670281	0.999985	RIC1	Protein involved in retrograde transport to the cis-Golgi network; forms heterodimer with Rgp1p that acts as a GTP exchange factor for Ypt6p; involved in transcription of rRNA and ribosomal protein genes
YIL173W	109.243	0.190493	0.354159	0.946075	109.243	-0.198591	0.462015	0.995869	109.243	0.389084	0.582139	0.999985	VTH1	Putative membrane glycoprotein with strong similarity to Vth2p and Pep1p/Vps10p, may be involved in vacuolar protein sorting
YER113C	71.1952	0.143207	0.380474	0.981235	71.1952	-0.022747	0.494005	0.995869	71.1952	0.165954	0.623539	0.999985	TMN3	Protein with a role in cellular adhesion and filamentous growth; similar to Emp70p and Tmn2p; member of Transmembrane Nine family with 9 transmembrane segments; localizes to Golgi; induced by 8-methoxypsoralen plus UVA irradiation
YDR233C	377.837	-0.175451	0.325754	0.946075	377.837	0.453148	0.442756	0.995869	377.837	-0.628598	0.549681	0.999985	RTN1	ER membrane protein that interacts with Sey1p to maintain ER morphology; interacts with exocyst subunit Sec6p, with Yip3p, and with Sbh1p; null mutant has an altered ER morphology; member of the RTNLA (reticulon-like A) subfamily
YML010W	591.81	-0.0219681	0.271278	0.996333	591.81	-0.44228	0.375489	0.995869	591.81	0.420312	0.463232	0.999985	SPT5	Protein involved in regulating Pol I and Pol II transcription and pre-mRNA processing; forms a complex with Spt4p; contains a C-terminal repeat domain that is a target for phosphorylation by Sgv1p
YOR119C	56.3644	-0.720004	0.424853	0.569095	56.3644	-1.45664	0.556662	0.580808	56.3644	0.736636	0.700127	0.999985	RIO1	Essential serine kinase involved in cell cycle progression and processing of the 20S pre-rRNA into mature 18S rRNA
YDR516C	389.951	1.56897	0.380198	0.00282892	389.951	0.950376	0.500314	0.995869	389.951	0.618591	0.628381	0.999985	EMI2	Non-essential protein of unknown function required for transcriptional induction of the early meiotic-specific transcription factor IME1; required for sporulation; expression is regulated by glucose-repression transcription factors Mig1/2p
YKL171W	25.3737	0.113053	0.505838	0.989131	25.3737	-0.758785	0.603104	0.995869	25.3737	0.871838	0.787124	0.999985	NNK1	Protein kinase; implicated in proteasome function; interacts with TORC1, Ure2 and Gdh2; overexpression leads to hypersensitivity to rapamycin and nuclear accumulation of Gln3; epitope-tagged protein localizes to the cytoplasm
YLR192C	432.895	0.250103	0.290654	0.876617	432.895	0.15345	0.412123	0.995869	432.895	0.0966528	0.504306	0.999985	HCR1	Dual function protein involved in translation initiation as a substoichiometric component (eIF3j) of translation initiation factor 3 (eIF3) and required for processing of 20S pre-rRNA; binds to eIF3 subunits Rpg1p and Prt1p and 18S rRNA
YPL019C	84.5801	0.249701	0.372243	0.917292	84.5801	0.279148	0.502257	0.995869	84.5801	-0.0294473	0.625162	0.999985	VTC3	Subunit of the vacuolar transporter chaperone (VTC) complex involved in membrane trafficking, vacuolar polyphosphate accumulation, microautophagy and non-autophagic vacuolar fusion
YIL014W	51.7763	-0.490703	0.431257	0.802954	51.7763	-0.711768	0.552419	0.995869	51.7763	0.221066	0.70079	0.999985	MNT3	Alpha-1,3-mannosyltransferase, adds the fourth and fifth alpha-1,3-linked mannose residues to O-linked glycans during protein O-glycosylation
YBL097W	77.3037	-0.264382	0.371403	0.904022	77.3037	-0.212346	0.503846	0.995869	77.3037	-0.0520365	0.625934	0.999985	BRN1	Subunit of the condensin complex; required for chromosome condensation and for clustering of tRNA genes at the nucleolus; may influence multiple aspects of chromosome transmission
YGR098C	73.3005	0.0787852	0.413391	0.98971	73.3005	-0.291687	0.528884	0.995869	73.3005	0.370472	0.671272	0.999985	ESP1	Separase, a caspase-like cysteine protease that promotes sister chromatid separation by mediating dissociation of the cohesin Scc1p from chromatin; inhibits protein phosphatase 2A-Cdc55p to promote mitotic exit; inhibited by Pds1p
YGR177C	31.0052	-1.36192	0.564975	0.224661	31.0052	-0.508955	0.637534	0.995869	31.0052	-0.852962	0.851813	0.999985	ATF2	Alcohol acetyltransferase, may play a role in steroid detoxification; forms volatile esters during fermentation, which is important for brewing and winemaking
YLR291C	116.435	-0.377978	0.354119	0.82201	116.435	-0.0879285	0.48194	0.995869	116.435	-0.290049	0.59805	0.999985	GCD7	Beta subunit of the translation initiation factor eIF2B, the guanine-nucleotide exchange factor for eIF2; activity subsequently regulated by phosphorylated eIF2; first identified as a negative regulator of GCN4 expression
YMR092C	290.412	0.628668	0.292777	0.324588	290.412	0.314997	0.409849	0.995869	290.412	0.313671	0.50368	0.999985	AIP1	Actin cortical patch component, interacts with the actin depolymerizing factor cofilin; required to restrict cofilin localization to cortical patches; contains WD repeats
YOR090C	50.9625	-0.00447315	0.427486	0.997966	50.9625	-0.0178316	0.551826	0.995869	50.9625	0.0133584	0.698037	0.999985	PTC5	Mitochondrial type 2C protein phosphatase (PP2C) involved in regulation of pyruvate dehydrogenase activity by dephosphorylating the serine 133 of the Pda1p subunit; acts in concert with kinases Pkp1p and Pkp2p and phosphatase Ptc6p
YKL117W	805.626	0.651734	0.333946	0.426019	805.626	0.141044	0.45294	0.995869	805.626	0.51069	0.562739	0.999985	SBA1	Co-chaperone that binds to and regulates Hsp90 family chaperones; important for pp60v-src activity in yeast; homologous to the mammalian p23 proteins and like p23 can regulate telomerase activity
YBR172C	117.615	-0.0713397	0.365578	0.98971	117.615	-0.525314	0.476699	0.995869	117.615	0.453974	0.600736	0.999985	SMY2	Protein of unknown function involved in COPII vesicle formation; interacts with the Sec23p/Sec24p subcomplex; overexpression suppresses the temperature sensitivity of a myo2 mutant; has similarity to S. pombe Mpd2
YNL233W	49.5358	0.616105	0.416926	0.641104	49.5358	0.14961	0.541767	0.995869	49.5358	0.466495	0.683618	0.999985	BNI4	Targeting subunit for Glc7p protein phosphatase, localized to the bud neck, required for localization of chitin synthase III to the bud neck via interaction with the chitin synthase III regulatory subunit Skt5p
YOL113W	22.6145	0.570617	0.542821	0.824259	22.6145	0.266045	0.616655	0.995869	22.6145	0.304572	0.821519	0.999985	SKM1	Member of the PAK family of serine/threonine protein kinases with similarity to Ste20p and Cla4p; involved in down-regulation of sterol uptake; proposed to be a downstream effector of Cdc42p during polarized growth
YPL190C	298.309	0.147598	0.381808	0.979652	298.309	0.0578515	0.501692	0.995869	298.309	0.0897461	0.630454	0.999985	NAB3	Single stranded RNA binding protein; acidic ribonucleoprotein; required for termination of non-poly(A) transcripts and efficient splicing; interacts with Nrd1p
YBL079W	193.538	-0.487656	0.319923	0.626774	193.538	-0.160625	0.431762	0.995869	193.538	-0.327031	0.537371	0.999985	NUP170	Subunit of the nuclear pore complex (NPC), required for NPC localization of specific nucleoporins; involved in nuclear envelope permeability and chromosome segregation; has similar to Nup157p; essential role, with Nup157p, in NPC assembly
YMR242C	2007.76	-0.140635	0.354337	0.979652	2007.76	0.0117471	0.465873	0.995869	2007.76	-0.152382	0.585314	0.999985	RPL20A	Protein component of the large (60S) ribosomal subunit, nearly identical to Rpl20Bp and has similarity to rat L18a ribosomal protein
YMR290C	240.248	-0.799359	0.299973	0.154838	240.248	-0.550605	0.426828	0.995869	240.248	-0.248754	0.521687	0.999985	HAS1	ATP-dependent RNA helicase; localizes to both the nuclear periphery and nucleolus; highly enriched in nuclear pore complex fractions; constituent of 66S pre-ribosomal particles
YML111W	84.2735	-0.868357	0.379804	0.274548	84.2735	-0.583161	0.496677	0.995869	84.2735	-0.285196	0.625231	0.999985	BUL2	Component of the Rsp5p E3-ubiquitin ligase complex, involved in intracellular amino acid permease sorting, functions in heat shock element mediated gene expression, essential for growth in stress conditions, functional homolog of BUL1
YER056C	199.617	-0.924469	0.325531	0.105134	199.617	-0.520078	0.441849	0.995869	199.617	-0.404391	0.548812	0.999985	FCY2	Purine-cytosine permease, mediates purine (adenine, guanine, and hypoxanthine) and cytosine accumulation
YKL034W	43.1862	0.60049	0.429287	0.665022	43.1862	0.402467	0.554615	0.995869	43.1862	0.198022	0.701339	0.999985	TUL1	Golgi-localized RING-finger ubiquitin ligase (E3), involved in ubiquitinating and sorting membrane proteins that contain polar transmembrane domains to multivesicular bodies for delivery to the vacuole for quality control purposes
YLR154C-G	82.565	1.03081	0.508958	0.391996	82.565	0.555336	0.610504	0.995869	82.565	0.475475	0.794813	0.999985		Putative protein of unknown function identified by fungal homology comparisons and RT-PCR; this ORF is contained within RDN25-2 and RDN37-2
YBR015C	325.795	0.237613	0.298259	0.88906	325.795	0.280916	0.409751	0.995869	325.795	-0.0433034	0.506808	0.999985	MNN2	Alpha-1,2-mannosyltransferase, responsible for addition of the first alpha-1,2-linked mannose to form the branches on the mannan backbone of oligosaccharides, localizes to an early Golgi compartment
YOL030W	494.761	-0.212912	0.298478	0.903452	494.761	0.100426	0.410105	0.995869	494.761	-0.313338	0.507223	0.999985	GAS5	1,3-beta-glucanosyltransferase, has similarity to Gas1p; localizes to the cell wall
YMR218C	67.6869	-0.297704	0.403101	0.903452	67.6869	-0.221494	0.52314	0.995869	67.6869	-0.0762098	0.660423	0.999985	TRS130	One of 10 subunits of the transport protein particle (TRAPP) complex of the cis-Golgi which mediates vesicle docking and fusion; involved in ER to Golgi membrane traffic; mutation activates transcription of OCH1
YIL036W	65.5179	-0.23393	0.378761	0.931569	65.5179	0.266969	0.498133	0.995869	65.5179	-0.500899	0.625782	0.999985	CST6	Basic leucine zipper (bZIP) transcription factor of the ATF/CREB family, proposed to be a regulator of oleate responsive genes; involved in utilization of non-optimal carbon sources and chromosome stability
YDR046C	337.741	0.295807	0.304159	0.841273	337.741	0.252872	0.414014	0.995869	337.741	0.0429346	0.513731	0.999985	BAP3	Amino acid permease involved in the uptake of cysteine, leucine, isoleucine and valine
YGL083W	42.8452	-0.386694	0.432089	0.87285	42.8452	-0.401855	0.557246	0.995869	42.8452	0.0151611	0.70512	0.999985	SCY1	Putative kinase, suppressor of GTPase mutant, similar to bovine rhodopsin kinase
YKL007W	110.882	0.54777	0.356611	0.625752	110.882	0.431518	0.484436	0.995869	110.882	0.116252	0.601538	0.999985	CAP1	Alpha subunit of the capping protein (CP) heterodimer (Cap1p and Cap2p) which binds to the barbed ends of actin filaments preventing further polymerization; localized predominantly to cortical actin patches
YKL106W	49.6154	-0.633411	0.462871	0.673247	49.6154	0.16901	0.583738	0.995869	49.6154	-0.802422	0.744991	0.999985	AAT1	Mitochondrial aspartate aminotransferase, catalyzes the conversion of oxaloacetate to aspartate in aspartate and asparagine biosynthesis
YPR103W	199.87	0.267155	0.338981	0.890444	199.87	0.641752	0.466078	0.995869	199.87	-0.374598	0.576313	0.999985	PRE2	Beta 5 subunit of the 20S proteasome, responsible for the chymotryptic activity of the proteasome
YNL323W	92.6939	0.0670173	0.376651	0.98971	92.6939	-0.316222	0.502289	0.995869	92.6939	0.383239	0.627819	0.999985	LEM3	Membrane protein of the plasma membrane and ER, interacts specifically in vivo with the phospholipid translocase (flippase) Dnf1p; involved in translocation of phospholipids and alkylphosphocholine drugs across the plasma membrane
YLR262C-A	87.3686	0.510214	0.384558	0.6847	87.3686	-0.0757528	0.533096	0.995869	87.3686	0.585966	0.657326	0.999985	TMA7	Protein of unknown that associates with ribosomes; null mutant exhibits translation defects, altered polyribosome profiles, and resistance to the translation inhibitor anisomcyin
YFR044C	683.777	0.465969	0.292758	0.600255	683.777	0.78073	0.407888	0.995869	683.777	-0.31476	0.502075	0.999985	DUG1	Cys-Gly metallo-di-peptidase; forms a complex with Dug2p and Dug3p to degrade glutathione (GSH) and other peptides containing a gamma-glu-X bond in an alternative pathway to GSH degradation by gamma-glutamyl transpeptidase (Ecm38p)
YLR309C	159.535	-0.165482	0.316738	0.949352	159.535	0.124438	0.440528	0.995869	159.535	-0.28992	0.542576	0.999985	IMH1	Protein involved in vesicular transport, mediates transport between an endosomal compartment and the Golgi, contains a Golgi-localization (GRIP) domain that interacts with activated Arl1p-GTP to localize Imh1p to the Golgi
YIL041W	436.35	0.134472	0.292711	0.957091	436.35	0.0549555	0.403969	0.995869	436.35	0.079516	0.49887	0.999985	GVP36	BAR domain-containing protein that localizes to both early and late Golgi vesicles; required for adaptation to varying nutrient concentrations, fluid-phase endocytosis, polarization of the actin cytoskeleton, and vacuole biogenesis
YDR200C	32.7774	0.062197	0.502011	0.994689	32.7774	0.217204	0.605719	0.995869	32.7774	-0.155007	0.786713	0.999985	VPS64	Protein required for cytoplasm to vacuole targeting of proteins; forms a complex with Far3p and Far7p to Far11p involved in recovery from pheromone-induced cell cycle arrest; mutant has increased aneuploidy tolerance
YIL140W	80.7959	0.306602	0.450409	0.913932	80.7959	0.238883	0.576435	0.995869	80.7959	0.0677188	0.731537	0.999985	AXL2	Integral plasma membrane protein required for axial budding in haploid cells, localizes to the incipient bud site and bud neck; glycosylated by Pmt4p; potential Cdc28p substrate
YMR029C	51.8885	0.636213	0.426924	0.634281	51.8885	0.85032	0.558436	0.995869	51.8885	-0.214107	0.702917	0.999985	FAR8	Protein involved in recovery from cell cycle arrest in response to pheromone, in a Far1p-independent pathway; interacts with Far3p, Far7p, Far9p, Far10p, and Far11p
YKL205W	132.656	-0.380291	0.349417	0.817739	132.656	-0.479614	0.468223	0.995869	132.656	0.0993238	0.584225	0.999985	LOS1	Nuclear pore protein involved in nuclear export of pre-tRNA and in re-export of mature tRNAs after their retrograde import from the cytoplasm
YJL060W	108.678	0.625838	0.366872	0.564217	108.678	0.909173	0.508225	0.995869	108.678	-0.283335	0.626803	0.999985	BNA3	Kynurenine aminotransferase, catalyzes formation of kynurenic acid from kynurenine; potential Cdc28p substrate
YML001W	132.045	0.300678	0.347943	0.876617	132.045	0.152394	0.484334	0.995869	132.045	0.148283	0.596359	0.999985	YPT7	Rab family GTPase; GTP-binding protein of the rab family; required for homotypic fusion event in vacuole inheritance, for endosome-endosome fusion, similar to mammalian Rab7
YML100W	754.05	1.3596	0.602248	0.282298	754.05	0.72478	0.64583	0.995869	754.05	0.63482	0.883062	0.999985	TSL1	Large subunit of trehalose 6-phosphate synthase (Tps1p)/phosphatase (Tps2p) complex, which converts uridine-5'-diphosphoglucose and glucose 6-phosphate to trehalose, similar to Tps3p and may share function; mutant has aneuploidy tolerance
YDR345C	1118.32	0.995374	0.296886	0.0328098	1118.32	1.35192	0.405261	0.163395	1118.32	-0.356545	0.502372	0.999985	HXT3	Low affinity glucose transporter of the major facilitator superfamily, expression is induced in low or high glucose conditions
YLR183C	78.4341	1.76035	0.439766	0.00427517	78.4341	0.66205	0.554432	0.995869	78.4341	1.0983	0.707597	0.999985	TOS4	Forkhead Associated domain containing protein and putative transcription factor found associated with chromatin; target of SBF transcription factor; expression is periodic and peaks in G1; similar to PLM2
YDR507C	197.93	0.291065	0.32938	0.876617	197.93	0.454147	0.45371	0.995869	197.93	-0.163082	0.560664	0.999985	GIN4	Protein kinase involved in bud growth and assembly of the septin ring, proposed to have kinase-dependent and kinase-independent activities; undergoes autophosphorylation; similar to Kcc4p and Hsl1p
YKL142W	170.132	0.932637	0.386687	0.224661	170.132	0.750177	0.509929	0.995869	170.132	0.18246	0.639961	0.999985	MRP8	Protein of unknown function; undergoes sumoylation; transcription induced under cell wall stress; protein levels are reduced under anaerobic conditions; originally thought to be a mitochondrial ribosomal protein based on sequence analysis
YIL005W	97.6526	-0.0277262	0.335967	0.9961	97.6526	-0.563628	0.470863	0.995869	97.6526	0.535902	0.578427	0.999985	EPS1	ER protein with chaperone and co-chaperone activity, involved in retention of resident ER proteins; has a role in recognizing proteins targeted for ER-associated degradation (ERAD), member of the protein disulfide isomerase family
YGR188C	30.6649	0.443959	0.499425	0.876617	30.6649	0.243724	0.598552	0.995869	30.6649	0.200235	0.779538	0.999985	BUB1	Protein kinase that forms a complex with Mad1p and Bub3p that is crucial in the checkpoint mechanism required to prevent cell cycle progression into anaphase in the presence of spindle damage, associates with centromere DNA via Skp1p
YBR260C	50.8078	0.0258086	0.401619	0.997417	50.8078	0.0528112	0.526791	0.995869	50.8078	-0.0270025	0.662426	0.999985	RGD1	GTPase-activating protein (RhoGAP) for Rho3p and Rho4p, possibly involved in control of actin cytoskeleton organization
YNL103W	65.1394	0.0808577	0.423405	0.98971	65.1394	-0.674154	0.533877	0.995869	65.1394	0.755012	0.681386	0.999985	MET4	Leucine-zipper transcriptional activator, responsible for the regulation of the sulfur amino acid pathway, requires different combinations of the auxiliary factors Cbf1p, Met28p, Met31p and Met32p
YOR081C	62.494	-0.400234	0.397149	0.83248	62.494	-0.219343	0.522545	0.995869	62.494	-0.180892	0.656328	0.999985	TGL5	Bifunction enzyme with triacylglycerol lipase and lysophosphatidic acid acyltransferase activity; involved in triacylglycerol mobilization; localizes to lipid particles; potential Cdc28p substrate
YKL160W	69.6221	0.119568	0.378403	0.984538	69.6221	0.294103	0.522699	0.995869	69.6221	-0.174534	0.645296	0.999985	ELF1	Transcription elongation factor that contains a conserved zinc finger domain; implicated in the maintenance of proper chromatin structure in actively transcribed regions; deletion inhibits Brome mosaic virus (BMV) gene expression
YAR007C	165.99	1.46869	0.31311	0.000334973	165.99	1.27763	0.43574	0.356996	165.99	0.19106	0.536546	0.999985	RFA1	Subunit of heterotrimeric Replication Protein A (RPA), which is a highly conserved single-stranded DNA binding protein involved in DNA replication, repair, and recombination
YCR005C	316.636	-0.0942601	0.414167	0.988269	316.636	0.159956	0.521173	0.995869	316.636	-0.254216	0.6657	0.999985	CIT2	Citrate synthase, catalyzes the condensation of acetyl coenzyme A and oxaloacetate to form citrate, peroxisomal isozyme involved in glyoxylate cycle; expression is controlled by Rtg1p and Rtg2p transcription factors
YLR028C	455.329	0.276973	0.281849	0.840489	455.329	0.174253	0.395262	0.995869	455.329	0.10272	0.485459	0.999985	ADE16	Enzyme of 'de novo' purine biosynthesis containing both 5-aminoimidazole-4-carboxamide ribonucleotide transformylase and inosine monophosphate cyclohydrolase activities, isozyme of Ade17p; ade16 ade17 mutants require adenine and histidine
YPR165W	558.054	0.253853	0.364466	0.90869	558.054	0.118323	0.481738	0.995869	558.054	0.13553	0.604075	0.999985	RHO1	GTP-binding protein of the rho subfamily of Ras-like proteins, involved in establishment of cell polarity; regulates protein kinase C (Pkc1p) and the cell wall synthesizing enzyme 1,3-beta-glucan synthase (Fks1p and Gsc2p)
YIL162W	85.6566	-0.0998541	0.3533	0.984538	85.6566	-0.241134	0.492377	0.995869	85.6566	0.14128	0.606013	0.999985	SUC2	Invertase, sucrose hydrolyzing enzyme; a secreted, glycosylated form is regulated by glucose repression, and an intracellular, nonglycosylated enzyme is produced constitutively
YDR266C	73.8447	-0.540786	0.389518	0.670024	73.8447	-0.705948	0.51155	0.995869	73.8447	0.165162	0.642942	0.999985		Protein of unknown function that may interact with ribosomes, based on co-purification experiments;green fluorescent protein (GFP)-fusion protein localizes to the cytoplasm; contains a RING finger domain
YJL042W	177.657	0.173693	0.339998	0.950944	177.657	0.0288453	0.454958	0.995869	177.657	0.144848	0.567967	0.999985	MHP1	Microtubule-associated protein involved in assembly and stabilization of microtubules; overproduction results in cell cycle arrest at G2 phase; similar to Drosophila protein MAP and to mammalian MAP4 proteins
YJL191W	435.116	0.0832731	0.307324	0.984538	435.116	-0.138851	0.418957	0.995869	435.116	0.222124	0.51959	0.999985	RPS14B	Ribosomal protein 59 of the small subunit, required for ribosome assembly and 20S pre-rRNA processing; mutations confer cryptopleurine resistance; nearly identical to Rps14Ap and similar to E. coli S11 and rat S14 ribosomal proteins
YER047C	40.6548	-0.237723	0.454052	0.949352	40.6548	0.00550454	0.564444	0.995869	40.6548	-0.243227	0.724403	0.999985	SAP1	Putative ATPase of the AAA family, interacts with the Sin1p transcriptional repressor in the two-hybrid system
YJL143W	153.203	-0.0297994	0.342852	0.995495	153.203	0.156497	0.486424	0.995869	153.203	-0.186297	0.595111	0.999985	TIM17	Essential subunit of the Translocase of the Inner Mitochondrial membrane (TIM23 complex); with Tim23p, contributes to the architecture and function of the import channel; may link the import motor to the core TIM23 complex
YKL190W	97.996	0.24541	0.396696	0.931091	97.996	0.127339	0.522156	0.995869	97.996	0.118071	0.655755	0.999985	CNB1	Calcineurin B; the regulatory subunit of calcineurin, a Ca++/calmodulin-regulated type 2B protein phosphatase which regulates Crz1p (a stress-response transcription factor), the other calcineurin subunit is encoded by CNA1 and/or CMP1
YBR026C	86.3893	0.488181	0.428563	0.802954	86.3893	0.178827	0.558108	0.995869	86.3893	0.309354	0.703669	0.999985	ETR1	2-enoyl thioester reductase, member of the medium chain dehydrogenase/reductase family; localized to in mitochondria, where it has a probable role in fatty acid synthesis
YBR127C	1936.4	0.268836	0.261334	0.830872	1936.4	0.161467	0.359001	0.995869	1936.4	0.107369	0.444046	0.999985	VMA2	Subunit B of the eight-subunit V1 peripheral membrane domain of the vacuolar H+-ATPase (V-ATPase), an electrogenic proton pump found throughout the endomembrane system; contains nucleotide binding sites; also detected in the cytoplasm
YMR308C	459.376	0.101424	0.279058	0.98227	459.376	-0.26491	0.38149	0.995869	459.376	0.366334	0.47266	0.999985	PSE1	Karyopherin/importin that interacts with the nuclear pore complex; acts as the nuclear import receptor for specific proteins, including Pdr1p, Yap1p, Ste12p, and Aft1p
YHL004W	51.8822	-0.451672	0.419479	0.82201	51.8822	-0.139912	0.549161	0.995869	51.8822	-0.311761	0.691036	0.999985	MRP4	Mitochondrial ribosomal protein of the small subunit
YNL288W	71.5006	0.303649	0.381377	0.88906	71.5006	0.280102	0.50698	0.995869	71.5006	0.0235469	0.634411	0.999985	CAF40	Evolutionarily conserved subunit of the CCR4-NOT complex involved in controlling mRNA initiation, elongation and degradation; binds Cdc39p
YMR209C	36.8343	0.0582163	0.473949	0.994689	36.8343	0.580948	0.592815	0.995869	36.8343	-0.522731	0.758996	0.999985		Putative S-adenosylmethionine-dependent methyltransferase; YMR209C is not an essential gene
YIL126W	262.892	-0.610857	0.285437	0.328287	262.892	-0.564707	0.396313	0.995869	262.892	-0.0461508	0.4884	0.999985	STH1	ATPase component of the RSC chromatin remodeling complex; required for expression of early meiotic genes; essential helicase-related protein homologous to Snf2p
YBL093C	32.5665	-0.269144	0.467409	0.940196	32.5665	-0.0780078	0.591172	0.995869	32.5665	-0.191136	0.753623	0.999985	ROX3	Subunit of the RNA polymerase II mediator complex; associates with core polymerase subunits to form the RNA polymerase II holoenzyme
YGL179C	32.5415	0.720219	0.476621	0.629533	32.5415	0.945756	0.583391	0.995869	32.5415	-0.225537	0.753285	0.999985	TOS3	Protein kinase, related to and functionally redundant with Elm1p and Sak1p for the phosphorylation and activation of Snf1p; functionally orthologous to LKB1, a mammalian kinase associated with Peutz-Jeghers cancer-susceptibility syndrome
YCR032W	57.031	-0.357428	0.422277	0.881484	57.031	-0.898772	0.529948	0.995869	57.031	0.541344	0.677579	0.999985	BPH1	PProtein homologous to human Chediak-Higashi syndrome and murine Beige proteins, which are implicated in disease syndromes due to defective lysosomal trafficking; mutant phenotype and genetic interactions suggest a role in protein sorting
YGR234W	197.393	0.11608	0.370214	0.984538	197.393	-0.16513	0.492398	0.995869	197.393	0.28121	0.616047	0.999985	YHB1	Nitric oxide oxidoreductase, flavohemoglobin involved in nitric oxide detoxification; plays a role in the oxidative and nitrosative stress responses
YOL052C	86.7172	-0.558881	0.351812	0.602261	86.7172	-0.577518	0.490057	0.995869	86.7172	0.0186367	0.603242	0.999985	SPE2	S-adenosylmethionine decarboxylase, required for the biosynthesis of spermidine and spermine; cells lacking Spe2p require spermine or spermidine for growth in the presence of oxygen but not when grown anaerobically
YKL056C	2102.19	-0.0480634	0.25716	0.98971	2102.19	0.137986	0.353308	0.995869	2102.19	-0.186049	0.436987	0.999985	TMA19	Protein that associates with ribosomes; homolog of translationally controlled tumor protein; green fluorescent protein (GFP)-fusion protein localizes to the cytoplasm and relocates to the mitochondrial outer surface upon oxidative stress
YER070W	1534.03	2.34844	0.361061	1.20024e-07	1534.03	1.97865	0.472976	0.0126153	1534.03	0.369791	0.595038	0.999985	RNR1	Major isoform of the large subunit of ribonucleotide-diphosphate reductase; the RNR complex catalyzes rate-limiting step in dNTP synthesis, regulated by DNA replication and DNA damage checkpoint pathways via localization of small subunits
YDR035W	438.824	0.147456	0.305103	0.952862	438.824	0.403496	0.420721	0.995869	438.824	-0.25604	0.519706	0.999985	ARO3	3-deoxy-D-arabino-heptulosonate-7-phosphate (DAHP) synthase, catalyzes the first step in aromatic amino acid biosynthesis and is feedback-inhibited by phenylalanine or high concentration of tyrosine or tryptophan
YLR439W	68.2229	0.184816	0.478946	0.979652	68.2229	-0.474294	0.588348	0.995869	68.2229	0.65911	0.758643	0.999985	MRPL4	Mitochondrial ribosomal protein of the large subunit
YBR110W	64.1963	0.0922949	0.392641	0.986813	64.1963	0.283088	0.521094	0.995869	64.1963	-0.190793	0.652465	0.999985	ALG1	Mannosyltransferase, involved in asparagine-linked glycosylation in the endoplasmic reticulum (ER); essential for viability, mutation is functionally complemented by human ortholog
YLR196W	433.317	-0.780102	0.379586	0.375542	433.317	-0.775619	0.503728	0.995869	433.317	-0.00448221	0.630731	0.999985	PWP1	Protein with WD-40 repeats involved in rRNA processing; associates with trans-acting ribosome biogenesis factors; similar to beta-transducin superfamily
YOR195W	92.7004	0.649224	0.373737	0.559113	92.7004	0.422752	0.494382	0.995869	92.7004	0.226472	0.619746	0.999985	SLK19	Kinetochore-associated protein required for normal segregation of chromosomes in meiosis and mitosis; component of the FEAR regulatory network, which promotes Cdc14p release from the nucleolus during anaphase; potential Cdc28p substrate
YLL051C	77.2401	-0.47042	0.432759	0.817739	77.2401	-0.471002	0.537488	0.995869	77.2401	0.000582717	0.690033	0.999985	FRE6	Putative ferric reductase with similarity to Fre2p; expression induced by low iron levels
YNL251C	263.682	0.957059	0.296316	0.0409501	263.682	0.436049	0.404871	0.995869	263.682	0.52101	0.501719	0.999985	NRD1	RNA-binding protein that interacts with the C-terminal domain of the RNA polymerase II large subunit (Rpo21p), preferentially at phosphorylated Ser5; required for transcription termination and 3' end maturation of nonpolyadenylated RNAs
YNL134C	183.319	1.10552	0.38182	0.09307	183.319	1.44698	0.506444	0.37237	183.319	-0.341465	0.634243	0.999985		Putative protein of unknown function with similarity to dehydrogenases from other model organisms; green fluorescent protein (GFP)-fusion protein localizes to both the cytoplasm and nucleus and is induced by the DNA-damaging agent MMS
YDR152W	106.505	-0.122161	0.350071	0.98435	106.505	0.124796	0.487202	0.995869	106.505	-0.246957	0.599931	0.999985	GIR2	Highly-acidic cytoplasmic RWD domain-containing protein of unknown function; forms a complex with Rbg2p; interacts with Rbg1p and Gcn1p; associates with translating ribosomes; putative intrinsically unstructured protein
YLR079W	37.4628	-0.604422	0.52363	0.795593	37.4628	-0.747428	0.620812	0.995869	37.4628	0.143006	0.812103	0.999985	SIC1	Inhibitor of Cdc28-Clb kinase complexes that controls G1/S phase transition, preventing premature S phase and ensuring genomic integrity; phosphorylation targets Sic1p for SCF(CDC4)-dependent turnover; functional homolog of mammalian Kip1
YOL016C	90.6663	0.857157	0.356076	0.225474	90.6663	0.297029	0.494802	0.995869	90.6663	0.560128	0.6096	0.999985	CMK2	Calmodulin-dependent protein kinase; may play a role in stress response, many CA++/calmodulan dependent phosphorylation substrates demonstrated in vitro, amino acid sequence similar to Cmk1p and mammalian Cam Kinase II
YGR270W	165.599	0.486503	0.319981	0.626774	165.599	-0.0155919	0.429533	0.995869	165.599	0.502095	0.535618	0.999985	YTA7	Protein that localizes to chromatin and has a role in regulation of histone gene expression; has a bromodomain-like region that interacts with the N-terminal tail of histone H3, and an ATPase domain; potentially phosphorylated by Cdc28p
YLR394W	17.5563	0.599044	0.619654	0.843026	17.5563	0.395923	0.643621	0.995869	17.5563	0.20312	0.893403	0.999985	CST9	SUMO E3 ligase; required for synaptonemal complex formation; localizes to synapsis initiation sites on meiotic chromosomes; potential Cdc28p substrate
YJL130C	2044.52	0.203598	0.265537	0.898803	2044.52	-0.137407	0.363244	0.995869	2044.52	0.341005	0.449951	0.999985	URA2	Bifunctional carbamoylphosphate synthetase (CPSase)-aspartate transcarbamylase (ATCase), catalyzes the first two enzymatic steps in the de novo biosynthesis of pyrimidines; both activities are subject to feedback inhibition by UTP
YHL011C	206.435	-0.210119	0.326236	0.924513	206.435	0.123844	0.457974	0.995869	206.435	-0.333963	0.562291	0.999985	PRS3	5-phospho-ribosyl-1(alpha)-pyrophosphate synthetase, synthesizes PRPP, which is required for nucleotide, histidine, and tryptophan biosynthesis; one of five related enzymes, which are active as heteromultimeric complexes
YER171W	74.7268	-0.190994	0.365855	0.949352	74.7268	-0.107468	0.495899	0.995869	74.7268	-0.0835258	0.616249	0.999985	RAD3	5' to 3' DNA helicase, involved in nucleotide excision repair and transcription; subunit of RNA polII initiation factor TFIIH and of Nucleotide Excision Repair Factor 3 (NEF3); homolog of human XPD protein; mutant has aneuploidy tolerance
YMR179W	41.3462	0.0283154	0.476671	0.997417	41.3462	0.932632	0.590413	0.995869	41.3462	-0.904317	0.75884	0.999985	SPT21	Protein with a role in transcriptional silencing; required for normal transcription at several loci including HTA2-HTB2 and HHF2-HHT2, but not required at the other histone loci; functionally related to Spt10p
YDR251W	106.216	0.477023	0.351264	0.676098	106.216	0.175062	0.467291	0.995869	106.216	0.301961	0.584591	0.999985	PAM1	Essential protein of unknown function; exhibits variable expression during colony morphogenesis; overexpression permits survival without protein phosphatase 2A, inhibits growth, and induces a filamentous phenotype
YOR296W	36.0555	-0.158808	0.500608	0.984538	36.0555	-0.372401	0.601479	0.995869	36.0555	0.213594	0.782538	0.999985		Putative protein of unknown function; green fluorescent protein (GFP)-fusion protein localizes to the cytoplasm; expressed during copper starvation; YOR296W is not an essential gene
YCL038C	44.4336	-0.271854	0.439165	0.931091	44.4336	-0.273255	0.569263	0.995869	44.4336	0.00140129	0.718964	0.999985	ATG22	Vacuolar integral membrane protein required for efflux of amino acids during autophagic body breakdown in the vacuole; null mutation causes a gradual loss of viability during starvation
YJL156C	37.4206	-0.250972	0.450195	0.940723	37.4206	-0.391188	0.573107	0.995869	37.4206	0.140217	0.728768	0.999985	SSY5	Serine protease of SPS plasma membrane amino acid sensor system (Ssy1p-Ptr3p-Ssy5p); contains an inhibitory domain that dissociates in response to extracellular amino acids, freeing a catalytic domain to activate transcription factor Stp1p
YML115C	154.606	0.0240581	0.327147	0.996333	154.606	-0.11637	0.458444	0.995869	154.606	0.140429	0.563201	0.999985	VAN1	Component of the mannan polymerase I, which contains Van1p and Mnn9p and is involved in the first steps of mannan synthesis; mutants are vanadate-resistant
YGL078C	240.536	-0.70101	0.372326	0.463729	240.536	-1.09133	0.505494	0.995869	240.536	0.390319	0.627805	0.999985	DBP3	Putative ATP-dependent RNA helicase of the DEAD-box family involved in ribosomal biogenesis
YHR219W	27.7324	-0.0654985	0.568065	0.994689	27.7324	0.0897097	0.626808	0.995869	27.7324	-0.155208	0.845928	0.999985		Putative protein of unknown function with similarity to helicases; located in the telomere region on the right arm of chromosome VIII
YKL113C	88.1616	1.3855	0.41453	0.0330828	88.1616	1.68444	0.562709	0.339281	88.1616	-0.29894	0.698767	0.999985	RAD27	5' to 3' exonuclease, 5' flap endonuclease, required for Okazaki fragment processing and maturation as well as for long-patch base-excision repair; member of the S. pombe RAD2/FEN1 family
YER016W	59.6613	0.576112	0.415493	0.67069	59.6613	0.439027	0.555184	0.995869	59.6613	0.137086	0.693438	0.999985	BIM1	Microtubule-binding protein that together with Kar9p makes up the cortical microtubule capture site and delays the exit from mitosis when the spindle is oriented abnormally
YGR014W	198.454	-0.839949	0.340045	0.211908	198.454	-0.786443	0.4523	0.995869	198.454	-0.0535066	0.565857	0.999985	MSB2	Mucin family member involved in the Cdc42p- and MAP kinase-dependent filamentous growth signaling pathway; also functions as an osmosensor in parallel to the Sho1p-mediated pathway; potential Cdc28p substrate
YOL070C	116.328	-0.947824	0.440154	0.323855	116.328	-0.364025	0.556284	0.995869	116.328	-0.5838	0.709352	0.999985	NBA1	Protein of unknown function, localizes to the bud neck and cytoplasm; interacts with Nap1p; may interact with ribosomes, based on co-purification experiments; potential Cdc28p substrate
YNL035C	61.6648	-0.0756424	0.378779	0.98971	61.6648	0.29643	0.527594	0.995869	61.6648	-0.372072	0.649491	0.999985		Putative protein of unknown function with similarity to proteins containing WD-40 domains; green fluorescent protein (GFP)-fusion protein localizes to the nucleus; YNL035C is not an essential gene
YBL039C	684.187	-0.436923	0.324818	0.676098	684.187	-0.664177	0.443282	0.995869	684.187	0.227254	0.549549	0.999985	URA7	Major CTP synthase isozyme (see also URA8), catalyzes the ATP-dependent transfer of the amide nitrogen from glutamine to UTP, forming CTP, the final step in de novo biosynthesis of pyrimidines; involved in phospholipid biosynthesis
YGR173W	211.461	0.117015	0.316895	0.981235	211.461	0.0660504	0.444887	0.995869	211.461	0.0509643	0.546212	0.999985	RBG2	Protein with a role in translation; forms a complex with Gir2p; has similarity to mammalian developmentally regulated GTP-binding protein
YDR457W	465.455	-0.123211	0.278898	0.965369	465.455	-0.463503	0.379367	0.995869	465.455	0.340291	0.470854	0.999985	TOM1	E3 ubiquitin ligase of the hect-domain class; has a role in mRNA export from the nucleus and may regulate transcriptional coactivators; involved in degradation of excess histones
YIL155C	148.47	0.543292	0.393519	0.67122	148.47	0.223859	0.515286	0.995869	148.47	0.319434	0.648364	0.999985	GUT2	Mitochondrial glycerol-3-phosphate dehydrogenase; expression is repressed by both glucose and cAMP and derepressed by non-fermentable carbon sources in a Snf1p, Rsf1p, Hap2/3/4/5 complex dependent manner
YKR090W	53.9049	-0.0590759	0.424303	0.994327	53.9049	-0.171301	0.542697	0.995869	53.9049	0.112225	0.688875	0.999985	PXL1	LIM domain-containing protein that localizes to sites of polarized growth, required for selection and/or maintenance of polarized growth sites, may modulate signaling by the GTPases Cdc42p and Rho1p; has similarity to metazoan paxillin
YHL033C	1197.85	0.188873	0.353818	0.946536	1197.85	-0.387133	0.466555	0.995869	1197.85	0.576006	0.585543	0.999985	RPL8A	Ribosomal protein L4 of the large (60S) ribosomal subunit, nearly identical to Rpl8Bp and has similarity to rat L7a ribosomal protein; mutation results in decreased amounts of free 60S subunits
YBR078W	2468.54	0.0380274	0.276907	0.994327	2468.54	0.374695	0.376149	0.995869	2468.54	-0.336668	0.467082	0.999985	ECM33	GPI-anchored protein of unknown function, has a possible role in apical bud growth; GPI-anchoring on the plasma membrane crucial to function; phosphorylated in mitochondria; similar to Sps2p and Pst1p
YLR248W	236.759	-0.232091	0.296745	0.891346	236.759	-0.109382	0.412917	0.995869	236.759	-0.122709	0.508486	0.999985	RCK2	Protein kinase involved in the response to oxidative and osmotic stress; identified as suppressor of S. pombe cell cycle checkpoint mutations; similar to CaM (calmodulin) kinases
YBR246W	50.8834	0.23764	0.426216	0.940723	50.8834	-0.0516648	0.551071	0.995869	50.8834	0.289305	0.696663	0.999985	RRT2	Putative protein of unknown function; non-essential gene identified in a screen for mutants with increased levels of rDNA transcription; null mutants display a weak carboxypeptidase Y missorting/secretion phenotype
YLR187W	116.853	0.171646	0.371936	0.957091	116.853	0.0206678	0.490095	0.995869	116.853	0.150978	0.615248	0.999985	SKG3	Protein of unknown function; green fluorescent protein (GFP)-fusion protein localizes to the cell periphery, cytoplasm, bud, and bud neck; potential Cdc28p substrate; similar to Caf120p and Skg4p
YLR086W	155.201	-0.393304	0.350804	0.802954	155.201	-0.542	0.467652	0.995869	155.201	0.148696	0.584597	0.999985	SMC4	Subunit of the condensin complex; reorganizes chromosomes during cell division; forms a complex with Smc2p that has ATP-hydrolyzing and DNA-binding activity; required for tRNA gene clustering at the nucleolus; potential Cdc28p substrate
YKL201C	43.8278	0.129714	0.503437	0.984538	43.8278	0.412489	0.600455	0.995869	43.8278	-0.282775	0.783583	0.999985	MNN4	Putative positive regulator of mannosylphosphate transferase (Mnn6p), involved in mannosylphosphorylation of N-linked oligosaccharides; expression increases in late-logarithmic and stationary growth phases
YFR004W	222.89	0.277956	0.285657	0.841273	222.89	-0.0599949	0.4103	0.995869	222.89	0.337951	0.499946	0.999985	RPN11	Metalloprotease subunit of the 19S regulatory particle of the 26S proteasome lid; couples the deubiquitination and degradation of proteasome substrates; involved, independent of catalytic activity, in fission of mitochondria and peroxisomes
YPR042C	69.4854	0.426834	0.380411	0.802954	69.4854	0.281614	0.495424	0.995869	69.4854	0.145219	0.624625	0.999985	PUF2	Member of the PUF protein family, which is defined by the presence of Pumilio homology domains that confer RNA binding activity; preferentially binds mRNAs encoding membrane-associated proteins
YHR183W	1293.84	0.350213	0.277372	0.719922	1293.84	0.246722	0.382448	0.995869	1293.84	0.10349	0.472442	0.999985	GND1	6-phosphogluconate dehydrogenase (decarboxylating), catalyzes an NADPH regenerating reaction in the pentose phosphate pathway; required for growth on D-glucono-delta-lactone and adaptation to oxidative stress
YML104C	38.3415	-0.052418	0.470899	0.994831	38.3415	-0.633339	0.575377	0.995869	38.3415	0.580921	0.743489	0.999985	MDM1	Intermediate filament protein, required for nuclear and mitochondrial transmission to daughter buds; contains a Phox homology (PX) domain and specifically binds phosphatidylinositol 3-phosphate (PtdIns-3-P)
YJL165C	58.955	0.0707013	0.392845	0.98971	58.955	0.196531	0.511564	0.995869	58.955	-0.12583	0.645002	0.999985	HAL5	Putative protein kinase; overexpression increases sodium and lithium tolerance, whereas gene disruption increases cation and low pH sensitivity and impairs potassium uptake, suggesting a role in regulation of Trk1p and/or Trk2p transporters
YBR202W	110.585	-1.39429	0.400474	0.0228747	110.585	-0.80906	0.515776	0.995869	110.585	-0.585233	0.652975	0.999985	MCM7	Component of the hexameric MCM complex, which is important for priming origins of DNA replication in G1 and becomes an active ATP-dependent helicase that promotes DNA melting and elongation when activated by Cdc7p-Dbf4p in S-phase
YHR208W	333.301	0.0530179	0.299086	0.98971	333.301	0.0141317	0.413966	0.995869	333.301	0.0388863	0.510706	0.999985	BAT1	Mitochondrial branched-chain amino acid aminotransferase, homolog of murine ECA39; highly expressed during logarithmic phase and repressed during stationary phase
YFR040W	133.378	0.272472	0.366127	0.903452	133.378	0.170785	0.484121	0.995869	133.378	0.101687	0.606978	0.999985	SAP155	Protein that forms a complex with the Sit4p protein phosphatase and is required for its function; member of a family of similar proteins including Sap4p, Sap185p, and Sap190p
YER025W	978.124	0.125379	0.284611	0.965626	978.124	-0.0484683	0.39275	0.995869	978.124	0.173848	0.485032	0.999985	GCD11	Gamma subunit of the translation initiation factor eIF2, involved in the identification of the start codon; binds GTP when forming the ternary complex with GTP and tRNAi-Met
YNL339C	40.1147	-0.225189	0.495227	0.958998	40.1147	0.158304	0.574421	0.995869	40.1147	-0.383493	0.758435	0.999985	YRF1-6	Helicase encoded by the Y' element of subtelomeric regions, highly expressed in the mutants lacking the telomerase component TLC1; potentially phosphorylated by Cdc28p
YPL268W	23.1694	-0.297182	0.563082	0.949062	23.1694	-0.15046	0.634799	0.995869	23.1694	-0.146723	0.848532	0.999985	PLC1	Phospholipase C, hydrolyzes phosphatidylinositol 4,5-biphosphate (PIP2) to generate the signaling molecules inositol 1,4,5-triphosphate (IP3) and 1,2-diacylglycerol (DAG); involved in regulating many cellular processes
YNL125C	63.7686	0.139905	0.385814	0.98227	63.7686	-0.0139258	0.503286	0.995869	63.7686	0.15383	0.634152	0.999985	ESBP6	Protein with similarity to monocarboxylate permeases, appears not to be involved in transport of monocarboxylates such as lactate, pyruvate or acetate across the plasma membrane
YOL007C	51.6733	0.235146	0.476023	0.952862	51.6733	0.783233	0.587195	0.995869	51.6733	-0.548087	0.755915	0.999985	CSI2	Protein of unknown function; green fluorescent protein (GFP)- fusion protein localizes to the mother side of the bud neck and the vacuole; YOL007C is not an essential gene
YBL028C	75.733	-0.950876	0.428012	0.296739	75.733	-0.809016	0.55906	0.995869	75.733	-0.14186	0.704033	0.999985		Protein of unknown function that may interact with ribosomes; green fluorescent protein (GFP)-fusion protein localizes to the nucleolus; predicted to be involved in ribosome biogenesis
YGR162W	957.035	-0.0139307	0.278323	0.997966	957.035	-0.466929	0.380283	0.995869	957.035	0.452998	0.471252	0.999985	TIF4631	Translation initiation factor eIF4G, subunit of the mRNA cap-binding protein complex (eIF4F) that also contains eIF4E (Cdc33p); interacts with Pab1p and with eIF4A (Tif1p); also has a role in biogenesis of the large ribosomal subunit
YMR033W	90.6378	0.0974113	0.352828	0.984538	90.6378	-0.244457	0.486186	0.995869	90.6378	0.341868	0.600717	0.999985	ARP9	Component of both the SWI/SNF and RSC chromatin remodeling complexes; actin-related protein involved in transcriptional regulation
YJL020C	387.502	0.231149	0.330431	0.90869	387.502	0.217873	0.443759	0.995869	387.502	0.0132761	0.553269	0.999985	BBC1	Protein possibly involved in assembly of actin patches; interacts with an actin assembly factor Las17p and with the SH3 domains of Type I myosins Myo3p and Myo5p; localized predominantly to cortical actin patches
YPL175W	28.6073	-0.755099	0.499173	0.629533	28.6073	-0.468077	0.599604	0.995869	28.6073	-0.287022	0.780125	0.999985	SPT14	UDP-GlcNAc-binding and catalytic subunit of the enzyme that mediates the first step in glycosylphosphatidylinositol (GPI) biosynthesis, mutations cause defects in transcription and in biogenesis of cell wall proteins
YJL121C	307.854	0.316811	0.270851	0.785937	307.854	0.651154	0.405922	0.995869	307.854	-0.334343	0.487989	0.999985	RPE1	D-ribulose-5-phosphate 3-epimerase, catalyzes a reaction in the non-oxidative part of the pentose-phosphate pathway; mutants are sensitive to oxidative stress
YJL200C	161.697	-0.242796	0.342659	0.906418	161.697	0.0061212	0.464802	0.995869	161.697	-0.248918	0.577456	0.999985	ACO2	Putative mitochondrial aconitase isozyme; similarity to Aco1p, an aconitase required for the TCA cycle; expression induced during growth on glucose, by amino acid starvation via Gcn4p, and repressed on ethanol
YDR262W	56.1129	-0.167113	0.393353	0.971362	56.1129	0.542954	0.530332	0.995869	56.1129	-0.710068	0.660305	0.999985		Putative protein of unknown function; green fluorescent protein (GFP)-fusion protein localizes to the vacuole and is induced in response to the DNA-damaging agent MMS; gene expression increases in response to Zymoliase treatment
YDR464W	122.385	-0.221076	0.361002	0.933902	122.385	-0.0314063	0.477766	0.995869	122.385	-0.18967	0.598818	0.999985	SPP41	Protein involved in negative regulation of expression of spliceosome components PRP4 and PRP3
YDR060W	310.244	-0.598906	0.318239	0.463729	310.244	-0.559	0.433919	0.995869	310.244	-0.0399057	0.538107	0.999985	MAK21	Constituent of 66S pre-ribosomal particles, required for large (60S) ribosomal subunit biogenesis; involved in nuclear export of pre-ribosomes; required for maintenance of dsRNA virus; homolog of human CAATT-binding protein
YGR140W	62.3735	0.0238342	0.437431	0.997417	62.3735	0.237218	0.562434	0.995869	62.3735	-0.213384	0.712519	0.999985	CBF2	Essential kinetochore protein, component of the CBF3 multisubunit complex that binds to the CDEIII region of the centromere; Cbf2p also binds to the CDEII region possibly forming a different multimeric complex, ubiquitinated in vivo
YOL124C	64.7196	-1.10557	0.417962	0.160959	64.7196	-0.603993	0.562099	0.995869	64.7196	-0.501575	0.700405	0.999985	TRM11	Catalytic subunit of an adoMet-dependent tRNA methyltransferase complex (Trm11p-Trm112p), required for the methylation of the guanosine nucleotide at position 10 (m2G10) in tRNAs; contains a THUMP domain and a methyltransferase domain
YDR161W	114.451	-0.0631642	0.37912	0.990857	114.451	-0.786209	0.517058	0.995869	114.451	0.723045	0.641147	0.999985		Putative protein of unknown function; non-essential gene; proposed function in rRNA and ribosome biosynthesis based on transcriptional co-regulation; genetic interactions suggest a role in ER-associated protein degradation (ERAD)
YKL021C	130.895	-0.0438888	0.350116	0.994689	130.895	-0.441779	0.491216	0.995869	130.895	0.39789	0.603216	0.999985	MAK11	Protein involved in an early, nucleolar step of 60S ribosomal subunit biogenesis; essential for cell growth and replication of killer M1 dsRNA virus; contains four beta-transducin repeats
YPL048W	831.929	0.298828	0.29812	0.83248	831.929	0.327742	0.41084	0.995869	831.929	-0.0289143	0.507607	0.999985	CAM1	Nuclear protein required for transcription of MXR1; binds the MXR1 promoter in the presence of other nuclear factors; binds calcium and phospholipids; has similarity to translational cofactor EF-1 gamma
YML126C	742.792	-0.0691767	0.278855	0.98531	742.792	0.146917	0.384993	0.995869	742.792	-0.216094	0.475373	0.999985	ERG13	3-hydroxy-3-methylglutaryl-CoA (HMG-CoA) synthase, catalyzes the formation of HMG-CoA from acetyl-CoA and acetoacetyl-CoA; involved in the second step in mevalonate biosynthesis
YAR003W	39.9181	0.433383	0.45191	0.843892	39.9181	-0.0979775	0.570971	0.995869	39.9181	0.531361	0.72817	0.999985	SWD1	Subunit of the COMPASS (Set1C) complex, which methylates histone H3 on lysine 4 and is required in transcriptional silencing near telomeres; WD40 beta propeller superfamily member with similarity to mammalian Rbbp7
YBL082C	86.4163	-0.0878635	0.369633	0.986813	86.4163	0.7701	0.495163	0.995869	86.4163	-0.857963	0.61792	0.999985	ALG3	Dolichol-P-Man dependent alpha(1-3) mannosyltransferase, involved in the synthesis of dolichol-linked oligosaccharide donor for N-linked glycosylation of proteins
YKL065C	118.613	0.367543	0.360482	0.831983	118.613	0.572928	0.49034	0.995869	118.613	-0.205385	0.608589	0.999985	YET1	Endoplasmic reticulum transmembrane protein; may interact with ribosomes, based on co-purification experiments; homolog of human BAP31 protein
YDR226W	649.535	0.191466	0.259968	0.903452	649.535	0.246945	0.367215	0.995869	649.535	-0.0554788	0.449923	0.999985	ADK1	Adenylate kinase, required for purine metabolism; localized to the cytoplasm and the mitochondria; lacks cleavable signal sequence
YPL084W	124.559	0.247402	0.32956	0.903452	124.559	0.0805635	0.450245	0.995869	124.559	0.166838	0.55797	0.999985	BRO1	Cytoplasmic class E vacuolar protein sorting (VPS) factor that coordinates deubiquitination in the multivesicular body (MVB) pathway by recruiting Doa4p to endosomes
YKL164C	191.124	-1.05073	0.415622	0.19271	191.124	-0.606559	0.531614	0.995869	191.124	-0.444169	0.674796	0.999985	PIR1	O-glycosylated protein required for cell wall stability; attached to the cell wall via beta-1,3-glucan; mediates mitochondrial translocation of Apn1p; expression regulated by the cell integrity pathway and by Swi5p during the cell cycle
YMR186W	5795.71	0.290496	0.370663	0.890444	5795.71	0.00518724	0.481704	0.995869	5795.71	0.285309	0.607808	0.999985	HSC82	Cytoplasmic chaperone of the Hsp90 family, redundant in function and nearly identical with Hsp82p, and together they are essential; expressed constitutively at 10-fold higher basal levels than HSP82 and induced 2-3 fold by heat shock
YDR420W	112.869	-0.126848	0.425456	0.984538	112.869	-0.515037	0.522985	0.995869	112.869	0.388189	0.674179	0.999985	HKR1	Mucin family member that functions as an osmosensor in the Sho1p-mediated HOG pathway with Msb2p; proposed to be a negative regulator of filamentous growth; mutant displays defects in beta-1,3 glucan synthesis and bud site selection
YCR089W	54.9808	0.531454	0.529896	0.83248	54.9808	-1.30013	0.612649	0.995869	54.9808	1.83158	0.810047	0.999985	FIG2	Cell wall adhesin, expressed specifically during mating; may be involved in maintenance of cell wall integrity during mating
YDL048C	33.2213	-0.00959273	0.477111	0.997966	33.2213	-0.257827	0.588343	0.995869	33.2213	0.248235	0.757478	0.999985	STP4	Protein containing a Kruppel-type zinc-finger domain; has similarity to Stp1p, Stp2p, and Stp3p
YOR085W	118.482	-0.0197092	0.364913	0.997474	118.482	0.616811	0.496292	0.995869	118.482	-0.63652	0.616013	0.999985	OST3	Gamma subunit of the oligosaccharyltransferase complex of the ER lumen, which catalyzes asparagine-linked glycosylation of newly synthesized proteins; Ost3p is important for N-glycosylation of a subset of proteins
YIL067C	47.1361	-0.264711	0.433963	0.933902	47.1361	-0.745571	0.564738	0.995869	47.1361	0.48086	0.712188	0.999985		Uncharacterized protein of unknown function
YLL040C	497.349	0.454329	0.298983	0.626774	497.349	0.0659408	0.405392	0.995869	497.349	0.388388	0.50372	0.999985	VPS13	Protein of unknown function; heterooligomeric or homooligomeric complex; peripherally associated with membranes; homologous to human COH1; involved in sporulation, vacuolar protein sorting and protein-Golgi retention
YJL002C	332.067	0.150911	0.289227	0.949352	332.067	-0.0827123	0.401055	0.995869	332.067	0.233624	0.494466	0.999985	OST1	Alpha subunit of the oligosaccharyltransferase complex of the ER lumen, which catalyzes asparagine-linked glycosylation of newly synthesized proteins
YNL240C	46.4508	-0.415804	0.445828	0.84852	46.4508	-0.262321	0.573953	0.995869	46.4508	-0.153484	0.726746	0.999985	NAR1	Component of the cytosolic iron-sulfur (FeS) protein assembly machinery, required for maturation of cytosolic and nuclear FeS proteins and for normal resistance to oxidative stress; homologous to human Narf
YPR161C	56.7374	-0.592578	0.403697	0.646744	56.7374	-0.34871	0.530058	0.995869	56.7374	-0.243868	0.666266	0.999985	SGV1	Cyclin (Bur2p)-dependent protein kinase that functions in transcriptional regulation; phosphorylates the carboxy-terminal domain of Rpo21p and the C-terminal repeat domain of Spt5p; regulated by Cak1p
YLR310C	168.244	0.0284235	0.324813	0.995495	168.244	-0.386311	0.435353	0.995869	168.244	0.414735	0.54317	0.999985	CDC25	Membrane bound guanine nucleotide exchange factor (GEF or GDP-release factor); indirectly regulates adenylate cyclase through activation of Ras1p and Ras2p by stimulating the exchange of GDP for GTP; required for progression through G1
YPL176C	85.2287	-0.222228	0.355697	0.929797	85.2287	0.574163	0.491282	0.995869	85.2287	-0.796391	0.606542	0.999985	TRE1	Plasma membrane protein that binds to Bsd2p and regulates ubiquitylation and vacuolar degradation of the metal transporter Smf1p; function is redundant with that of Tre2p; has similarity to transferrin receptors
YDL099W	55.5008	0.0515959	0.437265	0.994689	55.5008	0.557098	0.561565	0.995869	55.5008	-0.505502	0.711735	0.999985	BUG1	Cis-golgi localized protein involved in ER to Golgi transport; forms a complex with the mammalian GRASP65 homolog, Grh1p; mutants are compromised for the fusion of ER-derived vesicles with Golgi membranes
YGL012W	336.53	0.669596	0.30205	0.296739	336.53	0.699748	0.418218	0.995869	336.53	-0.0301518	0.515887	0.999985	ERG4	C-24(28) sterol reductase, catalyzes the final step in ergosterol biosynthesis; mutants are viable, but lack ergosterol
YKL096W	702.484	0.614204	0.262154	0.249306	702.484	0.607425	0.374502	0.995869	702.484	0.00677841	0.457138	0.999985	CWP1	Cell wall mannoprotein that localizes specifically to birth scars of daughter cells, linked to a beta-1,3- and beta-1,6-glucan heteropolymer through a phosphodiester bond; required for propionic acid resistance
YMR311C	108.765	0.260147	0.364489	0.903452	108.765	0.589665	0.499325	0.995869	108.765	-0.329519	0.618206	0.999985	GLC8	Regulatory subunit of protein phosphatase 1 (Glc7p), involved in glycogen metabolism and chromosome segregation; proposed to regulate Glc7p activity via conformational alteration; ortholog of the mammalian protein phosphatase inhibitor 2
YKR072C	126.87	-0.1777	0.343778	0.949508	126.87	-0.160543	0.462382	0.995869	126.87	-0.0171567	0.576176	0.999985	SIS2	Negative regulatory subunit of protein phosphatase 1 Ppz1p and also a subunit of the phosphopantothenoylcysteine decarboxylase (PPCDC; Cab3p, Sis2p, Vhs3p) complex, which catalyzes the third step of coenzyme A biosynthesis
YIR034C	72.8067	0.67631	0.412828	0.588014	72.8067	0.494285	0.549505	0.995869	72.8067	0.182025	0.687295	0.999985	LYS1	Saccharopine dehydrogenase (NAD+, L-lysine-forming), catalyzes the conversion of saccharopine to L-lysine, which is the final step in the lysine biosynthesis pathway; also has mRNA binding activity
YDL132W	165.141	0.252752	0.317526	0.88906	165.141	0.435336	0.435932	0.995869	165.141	-0.182584	0.539314	0.999985	CDC53	Cullin, structural protein of SCF complexes (which also contain Skp1p, Cdc34p, Hrt1p and an F-box protein) involved in ubiquitination; SCF promotes the G1-S transition by targeting G1 cyclins and the Cln-CDK inhibitor Sic1p for degradation
YDR390C	72.6577	0.0190103	0.389858	0.997966	72.6577	-0.350896	0.527775	0.995869	72.6577	0.369906	0.656147	0.999985	UBA2	Subunit of a heterodimeric nuclear SUMO activating enzyme (E1) with Aos1p; activates Smt3p (SUMO) before its conjugation to proteins (sumoylation), which may play a role in protein targeting; essential for viability
YOR076C	36.4202	-0.608651	0.455579	0.681639	36.4202	-0.322135	0.5734	0.995869	36.4202	-0.286516	0.732327	0.999985	SKI7	Coupling protein that mediates interactions between the Ski complex and the cytoplasmic exosome during 3'-5' RNA degradation; eRF3-like domain targets nonstop mRNA for degradation; null mutants have superkiller phenotype
YLR277C	79.7797	-0.383883	0.395061	0.841273	79.7797	-0.411502	0.519442	0.995869	79.7797	0.0276188	0.652593	0.999985	YSH1	Putative endoribonuclease, subunit of the mRNA cleavage and polyadenylation specificity complex; required for 3' processing, splicing, and transcriptional termination of mRNAs and snoRNAs
YOL092W	119.768	-0.333765	0.340832	0.840489	119.768	-0.502415	0.499764	0.995869	119.768	0.16865	0.604911	0.999985		Putative protein of unknown function; predicted to contain six transmembrane domains and is 58% similar to the uncharacterized ORF YBR147W
YLR398C	321.532	-0.138488	0.288971	0.954075	321.532	-0.263393	0.402895	0.995869	321.532	0.124906	0.49581	0.999985	SKI2	Ski complex component and putative RNA helicase, mediates 3'-5' RNA degradation by the cytoplasmic exosome; null mutants have superkiller phenotype of increased viral dsRNAs and are synthetic lethal with mutations in 5'-3' mRNA decay
YGL210W	49.8558	0.27681	0.398597	0.908815	49.8558	-0.142573	0.542099	0.995869	49.8558	0.419383	0.672867	0.999985	YPT32	Rab family GTPase, very similar to Ypt31p; involved in the exocytic pathway; mediates intra-Golgi traffic or the budding of post-Golgi vesicles from the trans-Golgi
YJR073C	88.3933	0.559368	0.344259	0.588507	88.3933	-0.157153	0.496567	0.995869	88.3933	0.716521	0.604231	0.999985	OPI3	Phospholipid methyltransferase (methylene-fatty-acyl-phospholipid synthase), catalyzes the last two steps in phosphatidylcholine biosynthesis
YKR036C	48.9641	-0.378236	0.433533	0.876617	48.9641	0.113587	0.546261	0.995869	48.9641	-0.491823	0.697394	0.999985	CAF4	WD40 repeat-containing protein associated with the CCR4-NOT complex, interacts in a Ccr4p-dependent manner with Ssn2p; also interacts with Fis1p, Mdv1p and Dnm1p and plays a role in mitochondrial fission
YDR500C	488.169	0.0199562	0.294753	0.996579	488.169	-0.189872	0.409155	0.995869	488.169	0.209829	0.504269	0.999985	RPL37B	Protein component of the large (60S) ribosomal subunit, has similarity to Rpl37Ap and to rat L37 ribosomal protein
YMR074C	110.356	0.28063	0.340827	0.887234	110.356	0.463662	0.477585	0.995869	110.356	-0.183032	0.586729	0.999985		Protein with homology to human PDCD5, which is involved in programmed cell death; N-terminal region forms a conserved triple-helix bundle structure; overexpression promotes H2O2-induced apoptosis; YMR074C is not an essential gene
YGR119C	90.4647	-0.32661	0.36438	0.872002	90.4647	-0.476342	0.488439	0.995869	90.4647	0.149732	0.609373	0.999985	NUP57	Nucleoporin, essential subunit of the nuclear pore complex (NPC), functions as the organizing center of an NPC subcomplex containing Nsp1p, Nup49p, Nup57p, and Nic96p
YLR354C	980.798	0.388252	0.270487	0.651021	980.798	0.38356	0.376073	0.995869	980.798	0.00469221	0.463243	0.999985	TAL1	Transaldolase, enzyme in the non-oxidative pentose phosphate pathway; converts sedoheptulose 7-phosphate and glyceraldehyde 3-phosphate to erythrose 4-phosphate and fructose 6-phosphate
YNL162W	2222.59	0.125326	0.290857	0.968184	2222.59	-0.0153193	0.392645	0.995869	2222.59	0.140645	0.488639	0.999985	RPL42A	Protein component of the large (60S) ribosomal subunit, identical to Rpl42Bp and has similarity to rat L44 ribosomal protein
YDR039C	474.835	-0.416419	0.272522	0.626774	474.835	-0.336855	0.376262	0.995869	474.835	-0.0795633	0.464587	0.999985	ENA2	P-type ATPase sodium pump, involved in Na+ efflux to allow salt tolerance; likely not involved in Li+ efflux
YLR130C	41.597	-0.27516	0.493824	0.940723	41.597	-0.0898686	0.587253	0.995869	41.597	-0.185291	0.76728	0.999985	ZRT2	Low-affinity zinc transporter of the plasma membrane; transcription is induced under low-zinc conditions by the Zap1p transcription factor
YMR131C	210.847	-0.721065	0.339607	0.334625	210.847	-0.79488	0.462387	0.995869	210.847	0.0738154	0.573695	0.999985	RRB1	Essential nuclear protein involved in early steps of ribosome biogenesis; physically interacts with the ribosomal protein Rpl3p
YNL192W	91.7837	-0.420218	0.353399	0.771745	91.7837	-0.580881	0.467086	0.995869	91.7837	0.160663	0.585696	0.999985	CHS1	Chitin synthase I, requires activation from zymogenic form in order to catalyze the transfer of N-acetylglucosamine (GlcNAc) to chitin; required for repairing the chitin septum during cytokinesis; transcription activated by mating factor
YGL113W	23.9729	0.763772	0.529927	0.647509	23.9729	-0.44554	0.615885	0.995869	23.9729	1.20931	0.812529	0.999985	SLD3	Protein involved in the initiation of DNA replication, required for proper assembly of replication proteins at the origins of replication; interacts with Cdc45p
YIL159W	27.4334	0.554036	0.519738	0.82201	27.4334	-0.325323	0.610536	0.995869	27.4334	0.879359	0.801817	0.999985	BNR1	Formin, nucleates the formation of linear actin filaments, involved in cell processes such as budding and mitotic spindle orientation which require the formation of polarized actin cables, functionally redundant with BNI1
YNR055C	78.6043	0.0964611	0.394581	0.98531	78.6043	-0.428904	0.513508	0.995869	78.6043	0.525365	0.647597	0.999985	HOL1	Putative transporter in the major facilitator superfamily (DHA1 family) of multidrug resistance transporters; mutations in membrane-spanning domains permit cation and histidinol uptake
YHR053C	57.5462	0.156165	0.420091	0.981235	57.5462	0.0475193	0.562531	0.995869	57.5462	0.108645	0.702081	0.999985	CUP1-1	Metallothionein, binds copper and mediates resistance to high concentrations of copper and cadmium; locus is variably amplified in different strains, with two copies, CUP1-1 and CUP1-2, in the genomic sequence reference strain S288C
YKR014C	188.2	0.321739	0.328957	0.841273	188.2	-0.0122541	0.464395	0.995869	188.2	0.333993	0.569101	0.999985	YPT52	Rab family GTPase, similar to Ypt51p and Ypt53p and to mammalian rab5; required for vacuolar protein sorting and endocytosis
YOL127W	1163.52	-0.069435	0.284688	0.98531	1163.52	0.0985131	0.388317	0.995869	1163.52	-0.167948	0.481495	0.999985	RPL25	Primary rRNA-binding ribosomal protein component of the large (60S) ribosomal subunit, has similarity to E. coli L23 and rat L23a ribosomal proteins; binds to 26S rRNA via a conserved C-terminal motif
YPL110C	70.803	0.434204	0.377945	0.798085	70.803	-0.330042	0.518142	0.995869	70.803	0.764246	0.641339	0.999985	GDE1	Glycerophosphocholine (GroPCho) phosphodiesterase; hydrolyzes GroPCho to choline and glycerolphosphate, for use as a phosphate source and as a precursor for phosphocholine synthesis; may interact with ribosomes
YOR256C	61.9833	0.413494	0.392223	0.824259	61.9833	0.46978	0.515415	0.995869	61.9833	-0.0562869	0.64768	0.999985	TRE2	Protein that functions with Tre1p to regulate ubiquitylation and vacuolar degradation of the metal transporter Smf1p; has similarity to transferrin receptors; inviability of null mutant in systematic studies is due to proximity to CDC31
YOR098C	176.204	-0.286381	0.306825	0.848304	176.204	-0.265964	0.42245	0.995869	176.204	-0.0204168	0.522114	0.999985	NUP1	Nuclear pore complex (NPC) subunit, involved in protein import/export and in export of RNAs, possible karyopherin release factor that accelerates release of karyopherin-cargo complexes after transport across NPC; potential Cdc28p substrate
YML024W	1776.63	-0.0305128	0.314442	0.995084	1776.63	0.0558212	0.420954	0.995869	1776.63	-0.086334	0.525429	0.999985	RPS17A	Ribosomal protein 51 (rp51) of the small (40s) subunit; nearly identical to Rps17Bp and has similarity to rat S17 ribosomal protein
YBR059C	195.778	0.28748	0.326097	0.876617	195.778	0.24205	0.438432	0.995869	195.778	0.0454291	0.546408	0.999985	AKL1	Ser-Thr protein kinase, member (with Ark1p and Prk1p) of the Ark kinase family; involved in endocytosis and actin cytoskeleton organization
YOR375C	474.838	0.484558	0.332332	0.646744	474.838	0.18296	0.451475	0.995869	474.838	0.301598	0.560602	0.999985	GDH1	NADP(+)-dependent glutamate dehydrogenase, synthesizes glutamate from ammonia and alpha-ketoglutarate; rate of alpha-ketoglutarate utilization differs from Gdh3p; expression regulated by nitrogen and carbon sources
YKL078W	48.1708	-1.42046	0.470947	0.0715596	48.1708	-0.891291	0.597356	0.995869	48.1708	-0.529167	0.760518	0.999985	DHR2	Predominantly nucleolar DEAH-box ATP-dependent RNA helicase, required for 18S rRNA synthesis
YNL039W	46.8532	0.0548158	0.427525	0.994689	46.8532	-0.268284	0.542563	0.995869	46.8532	0.323099	0.690757	0.999985	BDP1	Essential subunit of RNA polymerase III transcription factor (TFIIIB), which is involved in transcription of genes encoding tRNAs, 5S rRNA, U6 snRNA, and other small RNAs
YPL154C	995.657	0.698348	0.296007	0.241683	995.657	0.606274	0.403504	0.995869	995.657	0.0920739	0.500435	0.999985	PEP4	Vacuolar aspartyl protease (proteinase A), required for the posttranslational precursor maturation of vacuolar proteinases; important for protein turnover after oxidative damage; synthesized as a zymogen, self-activates
YNR011C	43.8859	0.112259	0.447899	0.985004	43.8859	0.141908	0.56762	0.995869	43.8859	-0.0296495	0.723055	0.999985	PRP2	RNA-dependent ATPase in the DEAH-box family, required for activation of the spliceosome before the first transesterification step in RNA splicing; orthologous to human protein DHX16
YGL157W	241.592	0.905656	0.321499	0.110423	241.592	0.628118	0.458542	0.995869	241.592	0.277538	0.560016	0.999985	ARI1	NADPH-dependent aldehyde reductase, utilizes aromatic and alophatic aldehyde substrates; member of the short-chain dehydrogenase/reductase superfamily
YOL038W	303.955	0.0610123	0.310033	0.98971	303.955	-0.183589	0.433267	0.995869	303.955	0.244601	0.532767	0.999985	PRE6	Alpha 4 subunit of the 20S proteasome; may replace alpha 3 subunit (Pre9p) under stress conditions to create a more active proteasomal isoform; GFP-fusion protein relocates from cytosol to the mitochondrial surface upon oxidative stress
YCL034W	126.249	0.200052	0.330846	0.933902	126.249	0.256447	0.467882	0.995869	126.249	-0.0563953	0.573039	0.999985	LSB5	Protein of unknown function; binds Las17p, which is a homolog of human Wiskott-Aldrich Syndrome protein involved in actin patch assembly and actin polymerization; may mediate disassembly of the Pan1 complex from the endocytic coat
YEL032W	144.895	-0.681498	0.354313	0.443921	144.895	-0.443896	0.474942	0.995869	144.895	-0.237602	0.592537	0.999985	MCM3	Protein involved in DNA replication; component of the Mcm2-7 hexameric complex that binds chromatin as a part of the pre-replicative complex
YML119W	33.3957	-2.72282	0.54024	8.94571e-05	33.3957	-1.94648	0.623473	0.262428	33.3957	-0.776347	0.824295	0.999985		Putative protein of unknown function; YML119W is not an essential gene; potential Cdc28p substrate
YJL001W	165.685	0.210427	0.324708	0.923324	165.685	0.412886	0.459531	0.995869	165.685	-0.20246	0.562677	0.999985	PRE3	Beta 1 subunit of the 20S proteasome, responsible for cleavage after acidic residues in peptides
YBR095C	43.8097	-0.772231	0.436712	0.538216	43.8097	-0.643117	0.559284	0.995869	43.8097	-0.129114	0.709519	0.999985	RXT2	Subunit of the histone deacetylase Rpd3L complex; possibly involved in cell fusion and invasive growth
YDR497C	356.674	-0.0205646	0.274352	0.996333	356.674	-0.225545	0.382795	0.995869	356.674	0.20498	0.470958	0.999985	ITR1	Myo-inositol transporter with strong similarity to the minor myo-inositol transporter Itr2p, member of the sugar transporter superfamily; expression is repressed by inositol and choline via Opi1p and derepressed via Ino2p and Ino4p
Q0160	90.5908	-0.251957	0.640941	0.979652	90.5908	-0.0999574	0.632977	0.995869	90.5908	-0.152	0.900814	0.999985	SCEI	I-SceI DNA endonuclease, encoded by the mitochondrial group I intron of the 21S_rRNA gene; mediates gene conversion that propagates the intron into intron-less copies of the 21S_rRNA gene
YDR309C	57.3063	-0.736599	0.425746	0.561747	57.3063	0.259198	0.536998	0.995869	57.3063	-0.995797	0.685311	0.999985	GIC2	Redundant rho-like GTPase Cdc42p effector; homolog of Gic1p; involved in initiation of budding and cellular polarization; interacts with Cdc42p via the Cdc42/Rac-interactive binding (CRIB) domain and with PI(4,5)P2 via a polybasic region
YPR183W	404.415	0.389525	0.271523	0.651021	404.415	0.554287	0.390417	0.995869	404.415	-0.164761	0.475552	0.999985	DPM1	Dolichol phosphate mannose (Dol-P-Man) synthase of the ER membrane, catalyzes the formation of Dol-P-Man from Dol-P and GDP-Man; required for glycosyl phosphatidylinositol membrane anchoring, O mannosylation, and protein glycosylation
YPL167C	25.4909	0.502551	0.604265	0.887234	25.4909	-0.19279	0.643717	0.995869	25.4909	0.695341	0.882901	0.999985	REV3	Catalytic subunit of DNA polymerase zeta, involved in translesion synthesis during post-replication repair; required for mutagenesis induced by DNA damage; involved in double-strand break repair
YMR120C	183.828	1.31388	0.40191	0.0377011	183.828	0.561965	0.547545	0.995869	183.828	0.751916	0.679211	0.999985	ADE17	Enzyme of 'de novo' purine biosynthesis containing both 5-aminoimidazole-4-carboxamide ribonucleotide transformylase and inosine monophosphate cyclohydrolase activities, isozyme of Ade16p; ade16 ade17 mutants require adenine and histidine
YAL041W	57.5856	-0.187351	0.393989	0.954827	57.5856	0.128813	0.522553	0.995869	57.5856	-0.316163	0.654441	0.999985	CDC24	Guanine nucleotide exchange factor (GEF or GDP-release factor) for Cdc42p; required for polarity establishment and maintenance, and mutants have morphological defects in bud formation and shmooing
YBL024W	330.561	-0.392151	0.284177	0.67122	330.561	-0.387157	0.399459	0.995869	330.561	-0.00499412	0.490227	0.999985	NCL1	S-adenosyl-L-methionine-dependent tRNA: m5C-methyltransferase, methylates cytosine to m5C at several positions in tRNAs and intron-containing pre-tRNAs; similar to Nop2p and human proliferation associated nucleolar protein p120
YGL245W	1427.55	0.335715	0.252076	0.681818	1427.55	-0.0151343	0.350034	0.995869	1427.55	0.350849	0.431354	0.999985	GUS1	Glutamyl-tRNA synthetase (GluRS), forms a complex with methionyl-tRNA synthetase (Mes1p) and Arc1p; complex formation increases the catalytic efficiency of both tRNA synthetases and ensures their correct localization to the cytoplasm
YDL022W	1496.25	1.25995	0.265457	0.000292553	1496.25	0.842694	0.3681	0.927211	1496.25	0.417256	0.453833	0.999985	GPD1	NAD-dependent glycerol-3-phosphate dehydrogenase, key enzyme of glycerol synthesis, essential for growth under osmotic stress; expression regulated by high-osmolarity glycerol response pathway; homolog of Gpd2p
YLR389C	246.67	0.569752	0.282336	0.396584	246.67	-0.0337043	0.39671	0.995869	246.67	0.603456	0.486921	0.999985	STE23	Metalloprotease involved, with homolog Axl1p, in N-terminal processing of pro-a-factor to the mature form; expressed in both haploids and diploids; member of the insulin-degrading enzyme family
YLR442C	75.9329	-0.329369	0.407381	0.88906	75.9329	-0.556869	0.527509	0.995869	75.9329	0.227499	0.666482	0.999985	SIR3	Silencing protein that interacts with Sir2p and Sir4p, and histone H3 and H4 tails, to establish a transcriptionally silent chromatin state; required for spreading of silenced chromatin; recruited to chromatin through interaction with Rap1p
YOR067C	89.3689	0.087234	0.340943	0.984538	89.3689	0.352171	0.48842	0.995869	89.3689	-0.264937	0.595651	0.999985	ALG8	Glucosyl transferase, involved in N-linked glycosylation; adds glucose to the dolichol-linked oligosaccharide precursor prior to transfer to protein during lipid-linked oligosaccharide biosynthesis; similar to Alg6p
YCR031C	1459.76	0.137327	0.248311	0.940966	1459.76	0.00889615	0.343881	0.995869	1459.76	0.12843	0.424161	0.999985	RPS14A	Ribosomal protein 59 of the small subunit, required for ribosome assembly and 20S pre-rRNA processing; mutations confer cryptopleurine resistance; nearly identical to Rps14Bp and similar to E. coli S11 and rat S14 ribosomal proteins
YML081W	102.535	-0.51249	0.359154	0.651021	102.535	-0.54095	0.462145	0.995869	102.535	0.0284604	0.585279	0.999985		Putative protein of unknown function; green fluorescent protein (GFP)-fusion protein localizes to the nucleus; YML081w is not an essential gene
YHR107C	251.239	0.12621	0.298392	0.972424	251.239	0.183777	0.432999	0.995869	251.239	-0.0575669	0.525858	0.999985	CDC12	Component of the septin ring of the mother-bud neck that is required for cytokinesis; septins recruit proteins to the neck and can act as a barrier to diffusion at the membrane, and they comprise the 10nm filaments seen with EM
YDL066W	833.006	0.287919	0.289681	0.83801	833.006	0.326589	0.397394	0.995869	833.006	-0.0386703	0.491769	0.999985	IDP1	Mitochondrial NADP-specific isocitrate dehydrogenase, catalyzes the oxidation of isocitrate to alpha-ketoglutarate; not required for mitochondrial respiration and may function to divert alpha-ketoglutarate to biosynthetic processes
YBL060W	30.1536	-0.551213	0.485385	0.802954	30.1536	0.307332	0.596575	0.995869	30.1536	-0.858545	0.769122	0.999985	YEL1	Guanine nucleotide exchange factor specific for Arf3p; localized to the bud neck and tip; required for localization of Arf3p to the bud neck and tip
YLR103C	69.1166	1.1606	0.463639	0.19931	69.1166	0.675133	0.577806	0.995869	69.1166	0.48547	0.740787	0.999985	CDC45	DNA replication initiation factor; recruited to MCM pre-RC complexes at replication origins; promotes release of MCM from Mcm10p, recruits elongation machinery; mutants in human homolog may cause velocardiofacial and DiGeorge syndromes
YGR229C	277.199	-0.309615	0.28322	0.816553	277.199	-0.253362	0.397424	0.995869	277.199	-0.0562532	0.488015	0.999985	SMI1	Protein involved in the regulation of cell wall synthesis; proposed to be involved in coordinating cell cycle progression with cell wall integrity
YML017W	120.323	-0.195905	0.352461	0.940941	120.323	-0.164078	0.474516	0.995869	120.323	-0.0318265	0.591094	0.999985	PSP2	Asn rich cytoplasmic protein that contains RGG motifs; high-copy suppressor of group II intron-splicing defects of a mutation in MRS2 and of a conditional mutation in POL1 (DNA polymerase alpha); possible role in mitochondrial mRNA splicing
YOR320C	62.7995	-0.0632147	0.394783	0.990857	62.7995	0.119356	0.529511	0.995869	62.7995	-0.18257	0.660484	0.999985	GNT1	N-acetylglucosaminyltransferase capable of modification of N-linked glycans in the Golgi apparatus
YLR002C	106.217	-0.7463	0.412921	0.519445	106.217	-0.577736	0.54465	0.995869	106.217	-0.168564	0.683456	0.999985	NOC3	Protein that forms a nuclear complex with Noc2p that binds to 66S ribosomal precursors to mediate their intranuclear transport; also binds to chromatin to promote the association of DNA replication factors and replication initiation
YOR023C	45.8857	-0.615361	0.445518	0.67122	45.8857	-0.575087	0.563737	0.995869	45.8857	-0.0402746	0.718493	0.999985	AHC1	Subunit of the Ada histone acetyltransferase complex, required for structural integrity of the complex
YLR244C	516.927	-0.193915	0.350199	0.940966	516.927	-0.269369	0.465901	0.995869	516.927	0.0754533	0.58284	0.999985	MAP1	Methionine aminopeptidase, catalyzes the cotranslational removal of N-terminal methionine from nascent polypeptides; function is partially redundant with that of Map2p
YJL177W	626.094	-0.0159377	0.286834	0.997417	626.094	-0.0304478	0.394697	0.995869	626.094	0.0145101	0.487913	0.999985	RPL17B	Protein component of the large (60S) ribosomal subunit, nearly identical to Rpl17Ap and has similarity to E. coli L22 and rat L17 ribosomal proteins
YLR020C	77.1533	0.222276	0.459314	0.952862	77.1533	0.0945067	0.574522	0.995869	77.1533	0.127769	0.735558	0.999985	YEH2	Steryl ester hydrolase, catalyzes steryl ester hydrolysis at the plasma membrane; involved in sterol metabolism
YPL246C	62.8418	-0.0014149	0.437104	0.998899	62.8418	0.141382	0.565217	0.995869	62.8418	-0.142797	0.714515	0.999985	RBD2	Possible rhomboid protease, has similarity to eukaryotic rhomboid proteases including Pcp1p
YLR222C	181.96	-0.633168	0.38809	0.588507	181.96	-0.654501	0.511816	0.995869	181.96	0.0213327	0.642303	0.999985	UTP13	Nucleolar protein, component of the small subunit (SSU) processome containing the U3 snoRNA that is involved in processing of pre-18S rRNA
YHL048W	78.2132	0.181368	0.360191	0.952039	78.2132	0.363721	0.50675	0.995869	78.2132	-0.182353	0.62172	0.999985	COS8	Nuclear membrane protein, member of the DUP380 subfamily of conserved, often subtelomerically-encoded proteins; regulation suggests a potential role in the unfolded protein response
YNL082W	41.6586	0.996307	0.450027	0.296847	41.6586	0.365361	0.572576	0.995869	41.6586	0.630947	0.72824	0.999985	PMS1	ATP-binding protein required for mismatch repair in mitosis and meiosis; functions as a heterodimer with Mlh1p, binds double- and single-stranded DNA via its N-terminal domain, similar to E. coli MutL
YLR121C	60.6814	-0.322903	0.566587	0.940196	60.6814	-0.233511	0.639762	0.995869	60.6814	-0.0893925	0.854575	0.999985	YPS3	Aspartic protease, member of the yapsin family of proteases involved in cell wall growth and maintenance; attached to the plasma membrane via a glycosylphosphatidylinositol (GPI) anchor
YDR028C	163.251	0.274221	0.338107	0.88906	163.251	-0.0250862	0.451619	0.995869	163.251	0.299307	0.564159	0.999985	REG1	Regulatory subunit of type 1 protein phosphatase Glc7p, involved in negative regulation of glucose-repressible genes
YMR102C	92.7708	-0.511228	0.358641	0.651021	92.7708	-0.0134032	0.468447	0.995869	92.7708	-0.497825	0.589971	0.999985		Protein of unknown function; transcription is activated by paralogous transcription factors Yrm1p and Yrr1p along with genes involved in multidrug resistance; mutant shows increased resistance to azoles; YMR102C is not an essential gene
YGR009C	81.8322	0.148164	0.39654	0.981235	81.8322	0.597823	0.522843	0.995869	81.8322	-0.449659	0.656211	0.999985	SEC9	t-SNARE protein important for fusion of secretory vesicles with the plasma membrane; similar to but not functionally redundant with Spo20p; SNAP-25 homolog
YHR024C	79.8357	0.0594394	0.371885	0.990857	79.8357	0.197344	0.506057	0.995869	79.8357	-0.137905	0.628008	0.999985	MAS2	Larger subunit of the mitochondrial processing protease (MPP), essential processing enzyme that cleaves the N-terminal targeting sequences from mitochondrially imported proteins
YGR180C	1137.96	0.947428	0.295644	0.0434304	1137.96	1.36674	0.401949	0.138	1137.96	-0.419311	0.498967	0.999985	RNR4	Ribonucleotide-diphosphate reductase (RNR), small subunit; the RNR complex catalyzes the rate-limiting step in dNTP synthesis and is regulated by DNA replication and DNA damage checkpoint pathways via localization of the small subunits
YER083C	65.309	-0.330049	0.394852	0.886559	65.309	-0.448035	0.533762	0.995869	65.309	0.117986	0.663922	0.999985	GET2	Subunit of the GET complex; involved in insertion of proteins into the ER membrane; required for the retrieval of HDEL proteins from the Golgi to the ER in an ERD2 dependent fashion and for meiotic nuclear division
YGR081C	37.9371	-0.641369	0.529583	0.754924	37.9371	0.0731651	0.624359	0.995869	37.9371	-0.714534	0.818711	0.999985	SLX9	Protein required for pre-rRNA processing; associated with the 90S pre-ribosome and 43S small ribosomal subunit precursor; interacts with U3 snoRNA; deletion mutant has synthetic fitness defect with an sgs1 deletion mutant
YDL189W	50.1477	-0.309202	0.42412	0.903452	50.1477	0.168285	0.533976	0.995869	50.1477	-0.477487	0.681923	0.999985	RBS1	Protein of unknown function, identified as a high copy suppressor of psk1 psk2 mutations that confer temperature-sensitivity for galactose utilization; proposed to bind single-stranded nucleic acids via its R3H domain
YMR300C	159.358	-0.359161	0.339979	0.824259	159.358	-0.637778	0.475418	0.995869	159.358	0.278617	0.584464	0.999985	ADE4	Phosphoribosylpyrophosphate amidotransferase (PRPPAT; amidophosphoribosyltransferase), catalyzes first step of the 'de novo' purine nucleotide biosynthetic pathway
YGL021W	119.081	-2.37033	0.35962	1.20024e-07	119.081	-1.21622	0.476975	0.662768	119.081	-1.15411	0.597276	0.999985	ALK1	Protein kinase; accumulation and phosphorylation are periodic during the cell cycle; phosphorylated in response to DNA damage; contains characteristic motifs for degradation via the APC pathway; similar to Alk2p and to mammalian haspins
YPL145C	389.346	0.22258	0.344754	0.924131	389.346	-0.0882677	0.463956	0.995869	389.346	0.310847	0.578023	0.999985	KES1	Member of the oxysterol binding protein family, which includes seven yeast homologs; involved in negative regulation of Sec14p-dependent Golgi complex secretory functions, peripheral membrane protein that localizes to the Golgi complex
YHR161C	60.4876	0.658484	0.39504	0.5798	60.4876	0.39344	0.51844	0.995869	60.4876	0.265044	0.651789	0.999985	YAP1801	Protein involved in clathrin cage assembly; binds Pan1p and clathrin; homologous to Yap1802p, member of the AP180 protein family
YJR127C	126.335	0.0724782	0.341229	0.98971	126.335	-0.268344	0.445585	0.995869	126.335	0.340822	0.561232	0.999985	RSF2	Zinc-finger protein involved in transcriptional control of both nuclear and mitochondrial genes, many of which specify products required for glycerol-based growth, respiration, and other functions
YLL008W	543.676	-0.225822	0.372775	0.933902	543.676	-0.605212	0.49337	0.995869	543.676	0.37939	0.618364	0.999985	DRS1	Nucleolar DEAD-box protein required for ribosome assembly and function, including synthesis of 60S ribosomal subunits; constituent of 66S pre-ribosomal particles
YOR144C	32.592	0.103626	0.48091	0.98971	32.592	-0.102884	0.589737	0.995869	32.592	0.20651	0.760959	0.999985	ELG1	Protein required for S phase progression and telomere homeostasis, forms an alternative replication factor C complex important for DNA replication and genome integrity; involved in homologous recombination-mediated DNA repair
YMR146C	543.118	-0.272526	0.294975	0.854427	543.118	-0.0965956	0.405477	0.995869	543.118	-0.17593	0.501419	0.999985	TIF34	eIF3i subunit of the core complex of translation initiation factor 3 (eIF3), which is essential for translation; stimulates rate of ribosomal scanning during translation reinitiation
YNL208W	442.107	0.801502	0.28923	0.121815	442.107	0.462743	0.406622	0.995869	442.107	0.33876	0.498993	0.999985		Protein of unknown function; may interact with ribosomes, based on co-purification experiments; authentic, non-tagged protein is detected in purified mitochondria in high-throughput studies; potential orthologs found in other fungi
YLR266C	41.8205	0.683091	0.491906	0.670024	41.8205	0.591058	0.586632	0.995869	41.8205	0.0920329	0.765559	0.999985	PDR8	Transcription factor; targets include ATP-binding cassette (ABC) transporters, major facilitator superfamily transporters, and other genes involved in the pleiotropic drug resistance (PDR) phenomenon
YPR129W	105.976	0.0631184	0.338717	0.98971	105.976	0.129174	0.473772	0.995869	105.976	-0.0660554	0.5824	0.999985	SCD6	Protein containing an Lsm domain; negatively regulates translation initiation via 48S preinitiation complex assembly; may bind RNA and have a role in RNA processing; overproduction suppresses null mutation in clathrin heavy chain gene CHC1
YMR047C	140.134	-0.0746544	0.329341	0.988269	140.134	0.0267129	0.444102	0.995869	140.134	-0.101367	0.552894	0.999985	NUP116	Subunit of the Nup82 subcomplex of the nuclear pore complex; localized to both sides of the pore; contains a repetitive GLFG motif that interacts with mRNA export factor Mex67p and with karyopherin Kap95p; homologous to Nup100p
YNL097C	42.3683	-0.0610998	0.445321	0.994327	42.3683	-0.0278951	0.572287	0.995869	42.3683	-0.0332047	0.725136	0.999985	PHO23	Probable component of the Rpd3 histone deacetylase complex, involved in transcriptional regulation of PHO5; C-terminus has similarity to human candidate tumor suppressor p33(ING1) and its isoform ING3
YGR195W	49.7143	-0.199365	0.402948	0.952862	49.7143	-0.10703	0.544333	0.995869	49.7143	-0.0923348	0.677244	0.999985	SKI6	Exosome non-catalytic core component; involved in 3'-5' RNA processing and degradation in both the nucleus and the cytoplasm; has similarity to E. coli RNase PH and to human hRrp41p (EXOSC4)
YBR118W	34485.8	0.144519	0.259002	0.940723	34485.8	0.109815	0.35182	0.995869	34485.8	0.034704	0.436874	0.999985	TEF2	Translational elongation factor EF-1 alpha; also encoded by TEF1; functions in the binding reaction of aminoacyl-tRNA (AA-tRNA) to ribosomes; may also have a role in tRNA re-export from the nucleus
YJR110W	36.163	-0.283723	0.465683	0.933902	36.163	-0.105441	0.576225	0.995869	36.163	-0.178282	0.740869	0.999985	YMR1	Phosphatidylinositol 3-phosphate (PI3P) phosphatase; involved in various protein sorting pathways, including CVT targeting and endosome to vacuole transport; has similarity to the conserved myotubularin dual specificity phosphatase family
YFL017C	46.701	0.0740554	0.412989	0.98971	46.701	-0.744485	0.548637	0.995869	46.701	0.818541	0.68669	0.999985	GNA1	Evolutionarily conserved glucosamine-6-phosphate acetyltransferase required for multiple cell cycle events including passage through START, DNA synthesis, and mitosis; involved in UDP-N-acetylglucosamine synthesis, forms GlcNAc6P from AcCoA
YJL093C	49.3648	0.459336	0.431457	0.82201	49.3648	0.173911	0.535485	0.995869	49.3648	0.285424	0.687675	0.999985	TOK1	Outward-rectifier potassium channel of the plasma membrane with two pore domains in tandem, each of which forms a functional channel permeable to potassium; carboxy tail functions to prevent inner gate closures; target of K1 toxin
YMR070W	53.7666	-0.384198	0.464023	0.887234	53.7666	0.084219	0.567394	0.995869	53.7666	-0.468417	0.732979	0.999985	MOT3	Nuclear transcription factor with two Cys2-His2 zinc fingers; involved in repression of a subset of hypoxic genes by Rox1p, repression of several DAN/TIR genes during aerobic growth, and repression of ergosterol biosynthetic genes
YLR237W	94.8626	0.0709703	0.429649	0.990857	94.8626	0.202068	0.554702	0.995869	94.8626	-0.131098	0.701638	0.999985	THI7	Plasma membrane transporter responsible for the uptake of thiamine, member of the major facilitator superfamily of transporters; mutation of human ortholog causes thiamine-responsive megaloblastic anemia
YDR358W	46.3332	0.570134	0.463	0.742139	46.3332	0.780978	0.579883	0.995869	46.3332	-0.210844	0.742039	0.999985	GGA1	Golgi-localized protein with homology to gamma-adaptin, interacts with and regulates Arf1p and Arf2p in a GTP-dependent manner in order to facilitate traffic through the late Golgi
YLR116W	41.6343	-0.266047	0.499452	0.947015	41.6343	-0.118342	0.60191	0.995869	41.6343	-0.147705	0.782137	0.999985	MSL5	Component of the commitment complex, which defines the first step in the splicing pathway; essential protein that interacts with Mud2p and Prp40p, forming a bridge between the intron ends; also involved in nuclear retention of pre-mRNA
YLR350W	88.3927	0.0398158	0.413837	0.995084	88.3927	-0.122633	0.54317	0.995869	88.3927	0.162449	0.682857	0.999985	ORM2	Evolutionarily conserved protein, similar to Orm1p, required for resistance to agents that induce unfolded protein response; Orm1p and Orm2p together control membrane biogenesis by coordinating lipid homeostasis with protein quality control
YHL019C	45.4356	0.0581404	0.431436	0.994327	45.4356	-0.308213	0.545199	0.995869	45.4356	0.366353	0.69525	0.999985	APM2	Protein of unknown function, homologous to the medium chain of mammalian clathrin-associated protein complex; involved in vesicular transport
YKL092C	45.0187	-0.0115489	0.441987	0.997966	45.0187	-0.223141	0.557892	0.995869	45.0187	0.211592	0.71175	0.999985	BUD2	GTPase activating factor for Rsr1p/Bud1p required for both axial and bipolar budding patterns; mutants exhibit random budding in all cell types
YJL138C	3368.37	-0.0010153	0.33467	0.998899	3368.37	0.0192905	0.442771	0.995869	3368.37	-0.0203058	0.555023	0.999985	TIF2	Translation initiation factor eIF4A, identical to Tif1p; DEA(D/H)-box RNA helicase that couples ATPase activity to RNA binding and unwinding; forms a dumbbell structure of two compact domains connected by a linker; interacts with eIF4G
YDR394W	218.03	0.277401	0.295631	0.847139	218.03	0.384437	0.417113	0.995869	218.03	-0.107037	0.511254	0.999985	RPT3	One of six ATPases of the 19S regulatory particle of the 26S proteasome involved in the degradation of ubiquitinated substrates; substrate of N-acetyltransferase B
YEL050C	44.5615	0.00353267	0.450748	0.997966	44.5615	-0.602777	0.570842	0.995869	44.5615	0.60631	0.727334	0.999985	RML2	Mitochondrial ribosomal protein of the large subunit, has similarity to E. coli L2 ribosomal protein; fat21 mutant allele causes inability to utilize oleate and may interfere with activity of the Adr1p transcription factor
YOR317W	659.169	0.621241	0.292386	0.334459	659.169	0.428427	0.399094	0.995869	659.169	0.192814	0.494738	0.999985	FAA1	Long chain fatty acyl-CoA synthetase, activates imported fatty acids with a preference for C12:0-C16:0 chain lengths; functions in long chain fatty acid import; accounts for most acyl-CoA synthetase activity; localized to lipid particles
YMR153W	46.3007	-0.30341	0.423252	0.903452	46.3007	-0.675988	0.560208	0.995869	46.3007	0.372578	0.702082	0.999985	NUP53	Subunit of the nuclear pore complex (NPC), interacts with karyopherin Kap121p or with Nup170p via overlapping regions of Nup53p, involved in activation of the spindle checkpoint mediated by the Mad1p-Mad2p complex
YDL015C	147.138	-0.126273	0.324786	0.979652	147.138	-0.097477	0.448333	0.995869	147.138	-0.0287956	0.553614	0.999985	TSC13	Enoyl reductase that catalyzes the last step in each cycle of very long chain fatty acid elongation, localizes to the ER, highly enriched in a structure marking nuclear-vacuolar junctions, coimmunoprecipitates with elongases Fen1p and Sur4p
YJL225C	54.5473	0.238401	0.47255	0.952039	54.5473	0.402644	0.551276	0.995869	54.5473	-0.164243	0.726094	0.999985		Putative protein of unknown function; similarity to DNA helicases that are also encoded within subtelomeric Y' elements and induced in telomerase deficient survivors
YLR390W-A	999.095	0.0583575	0.3243	0.98971	999.095	0.383739	0.438809	0.995869	999.095	-0.325382	0.545641	0.999985	CCW14	Covalently linked cell wall glycoprotein, present in the inner layer of the cell wall
YMR315W	449.073	1.30816	0.319162	0.00311578	449.073	1.60449	0.435213	0.0567624	449.073	-0.296329	0.539695	0.999985		Protein with NADP(H) oxidoreductase activity; transcription is regulated by Stb5p in response to NADPH depletion induced by diamide; promoter contains a putative Stb5p binding site
YNL079C	840.524	0.36809	0.374594	0.840489	840.524	0.37394	0.493677	0.995869	840.524	-0.00584997	0.619708	0.999985	TPM1	Major isoform of tropomyosin; binds to and stabilizes actin cables and filaments, which direct polarized cell growth and the distribution of several organelles; acetylated by the NatB complex and acetylated form binds actin most efficiently
YPL150W	36.1155	0.0214903	0.481608	0.997966	36.1155	0.029252	0.583973	0.995869	36.1155	-0.00776174	0.756949	0.999985		Putative protein kinase of unknown cellular role
YMR214W	159.258	0.142235	0.309348	0.957091	159.258	0.153989	0.463921	0.995869	159.258	-0.0117542	0.557602	0.999985	SCJ1	One of several homologs of bacterial chaperone DnaJ, located in the ER lumen where it cooperates with Kar2p to mediate maturation of proteins
YNR015W	84.8656	-0.332453	0.381603	0.876617	84.8656	-0.0210259	0.515596	0.995869	84.8656	-0.311428	0.641451	0.999985	SMM1	Dihydrouridine synthase, member of a family of dihydrouridine synthases including Dus1p, Smm1p, Dus3p, and Dus4p; modifies uridine residues at position 20 of cytoplasmic tRNAs
YPL235W	169.339	0.0465483	0.347502	0.994327	169.339	-0.115325	0.475784	0.995869	169.339	0.161874	0.589176	0.999985	RVB2	Essential protein involved in transcription regulation; component of chromatin remodeling complexes; required for assembly and function of the INO80 complex; also referred to as reptin; member of the RUVB-like protein family
YCL030C	361.099	0.589158	0.273588	0.323855	361.099	0.206809	0.388216	0.995869	361.099	0.38235	0.474933	0.999985	HIS4	Multifunctional enzyme containing phosphoribosyl-ATP pyrophosphatase, phosphoribosyl-AMP cyclohydrolase, and histidinol dehydrogenase activities; catalyzes the second, third, ninth and tenth steps in histidine biosynthesis
YBL075C	28.4319	0.803606	0.594091	0.676098	28.4319	-0.604052	0.642143	0.995869	28.4319	1.40766	0.874841	0.999985	SSA3	ATPase involved in protein folding and the response to stress; plays a role in SRP-dependent cotranslational protein-membrane targeting and translocation; member of the heat shock protein 70 (HSP70) family; localized to the cytoplasm
YEL036C	245.209	0.266908	0.362278	0.903452	245.209	-0.400614	0.482437	0.995869	245.209	0.667522	0.603316	0.999985	ANP1	Subunit of the alpha-1,6 mannosyltransferase complex; type II membrane protein; has a role in retention of glycosyltransferases in the Golgi; involved in osmotic sensitivity and resistance to aminonitrophenyl propanediol
YLR413W	325.214	-1.1472	0.36736	0.0550825	325.214	-0.702871	0.48329	0.995869	325.214	-0.444326	0.607057	0.999985		Putative protein of unknown function; YLR413W is not an essential gene
YJR132W	151.664	-0.271165	0.341482	0.88906	151.664	-0.839778	0.465918	0.995869	151.664	0.568612	0.577652	0.999985	NMD5	Karyopherin, a carrier protein involved in nuclear import of proteins; importin beta homolog
YAL032C	27.3893	-0.328798	0.523287	0.926822	27.3893	-0.504825	0.61412	0.995869	27.3893	0.176027	0.806793	0.999985	PRP45	Protein required for pre-mRNA splicing; associates with the spliceosome and interacts with splicing factors Prp22p and Prp46p; orthologous to human transcriptional coactivator SKIP and can activate transcription of a reporter gene
YLR017W	142.507	-0.474519	0.436324	0.817739	142.507	-0.594006	0.567227	0.995869	142.507	0.119487	0.71562	0.999985	MEU1	Methylthioadenosine phosphorylase (MTAP), catalyzes the initial step in the methionine salvage pathway; affects polyamine biosynthesis through regulation of ornithine decarboxylase (Spe1p) activity; regulates ADH2 gene expression
YLR372W	452.865	0.0830991	0.358606	0.987219	452.865	0.459654	0.47749	0.995869	452.865	-0.376555	0.597157	0.999985	SUR4	Elongase, involved in fatty acid and sphingolipid biosynthesis; synthesizes very long chain 20-26-carbon fatty acids from C18-CoA primers; involved in regulation of sphingolipid biosynthesis
YJL039C	248.921	-0.0604723	0.312074	0.98971	248.921	-0.390291	0.424355	0.995869	248.921	0.329818	0.526751	0.999985	NUP192	Essential structural subunit of the nuclear pore complex (NPC), localizes to the nuclear periphery of nuclear pores, homologous to human p205
YNL302C	1578.66	-0.152404	0.271247	0.940196	1578.66	-0.0080573	0.372424	0.995869	1578.66	-0.144347	0.460733	0.999985	RPS19B	Protein component of the small (40S) ribosomal subunit, required for assembly and maturation of pre-40 S particles; mutations in human RPS19 are associated with Diamond Blackfan anemia; nearly identical to Rps19Ap
YGR094W	1672.01	0.147799	0.248353	0.936529	1672.01	0.184117	0.342034	0.995869	1672.01	-0.0363174	0.42269	0.999985	VAS1	Mitochondrial and cytoplasmic valyl-tRNA synthetase
YHR211W	25.7868	-0.252971	0.604012	0.974061	25.7868	-0.0192444	0.637818	0.995869	25.7868	-0.233727	0.878429	0.999985	FLO5	Lectin-like cell wall protein (flocculin) involved in flocculation, binds to mannose chains on the surface of other cells, confers floc-forming ability that is chymotrypsin resistant but heat labile; similar to Flo1p
YIR012W	224.626	-0.265563	0.307851	0.876617	224.626	-0.0673326	0.442235	0.995869	224.626	-0.19823	0.538835	0.999985	SQT1	Essential protein involved in a late step of 60S ribosomal subunit assembly or modification; contains multiple WD repeats; interacts with Qsr1p in a two-hybrid assay
YDL235C	89.1718	-0.0118237	0.369419	0.997966	89.1718	-0.246028	0.513231	0.995869	89.1718	0.234204	0.632353	0.999985	YPD1	Phosphorelay intermediate protein, phosphorylated by the plasma membrane sensor Sln1p in response to osmotic stress and then in turn phosphorylates the response regulators Ssk1p in the cytosol and Skn7p in the nucleus
YJL192C	92.5548	0.00761615	0.364368	0.997966	92.5548	-0.139784	0.502005	0.995869	92.5548	0.1474	0.620299	0.999985	SOP4	ER-membrane protein; suppressor of pma1-7, deletion of SOP4 slows down the export of wild-type Pma1p and Pma1-7 from the ER
YDL083C	1112.78	0.240371	0.274108	0.876617	1112.78	0.0457849	0.378415	0.995869	1112.78	0.194586	0.467261	0.999985	RPS16B	Protein component of the small (40S) ribosomal subunit; identical to Rps16Ap and has similarity to E. coli S9 and rat S16 ribosomal proteins
YMR250W	214.207	1.15749	0.611493	0.459059	214.207	0.826035	0.646028	0.995869	214.207	0.331459	0.889537	0.999985	GAD1	Glutamate decarboxylase, converts glutamate into gamma-aminobutyric acid (GABA) during glutamate catabolism; involved in response to oxidative stress
YOR014W	147.77	0.0636038	0.31356	0.98971	147.77	-0.0407216	0.426926	0.995869	147.77	0.104325	0.529703	0.999985	RTS1	B-type regulatory subunit of protein phosphatase 2A (PP2A); homolog of the mammalian B' subunit of PP2A
YLR134W	1228.99	0.393117	0.280522	0.664802	1228.99	-0.0920152	0.470408	0.995869	1228.99	0.485132	0.547701	0.999985	PDC5	Minor isoform of pyruvate decarboxylase, key enzyme in alcoholic fermentation, decarboxylates pyruvate to acetaldehyde, regulation is glucose- and ethanol-dependent, repressed by thiamine, involved in amino acid catabolism
YNL169C	75.2687	0.347284	0.360702	0.843811	75.2687	0.479687	0.493304	0.995869	75.2687	-0.132404	0.611109	0.999985	PSD1	Phosphatidylserine decarboxylase of the mitochondrial inner membrane, converts phosphatidylserine to phosphatidylethanolamine
YKL209C	160.828	-1.17401	0.343415	0.0275147	160.828	-1.05475	0.457584	0.921742	160.828	-0.119265	0.572095	0.999985	STE6	Plasma membrane ATP-binding cassette (ABC) transporter required for the export of a-factor, catalyzes ATP hydrolysis coupled to a-factor transport; contains 12 transmembrane domains and two ATP binding domains; expressed only in MATa cells
YNL068C	56.8425	-0.690641	0.442441	0.621562	56.8425	-0.849607	0.556054	0.995869	56.8425	0.158966	0.710559	0.999985	FKH2	Forkhead family transcription factor with a major role in the expression of G2/M phase genes; positively regulates transcriptional elongation; negative role in chromatin silencing at HML and HMR; substrate of the Cdc28p/Clb5p kinase
YBL064C	152.866	1.09746	0.394185	0.118676	152.866	0.535553	0.518315	0.995869	152.866	0.561912	0.651174	0.999985	PRX1	Mitochondrial peroxiredoxin (1-Cys Prx) with thioredoxin peroxidase activity, has a role in reduction of hydroperoxides; reactivation requires Trr2p and glutathione; induced during respiratory growth and oxidative stress; phosphorylated
YHR103W	99.5458	-0.0269245	0.37001	0.996333	99.5458	-0.0159082	0.481074	0.995869	99.5458	-0.0110163	0.60691	0.999985	SBE22	Protein involved in the transport of cell wall components from the Golgi to the cell surface; similar in structure and functionally redundant with Sbe2p; involved in bud growth
YGL142C	50.4803	0.132398	0.429873	0.984538	50.4803	0.180161	0.55806	0.995869	50.4803	-0.0477634	0.704431	0.999985	GPI10	Integral membrane protein involved in glycosylphosphatidylinositol (GPI) anchor synthesis; putative alpha 1,2 mannosyltransferase required for addition of the third mannose onto the GPI core structure; human PIG-Bp is a functional homolog
YER069W	126.103	0.970011	0.369231	0.164473	126.103	0.915582	0.497841	0.995869	126.103	0.0544282	0.619813	0.999985	ARG5,6	Protein that is processed in the mitochondrion to yield acetylglutamate kinase and N-acetyl-gamma-glutamyl-phosphate reductase, which catalyze the 2nd and 3rd steps in arginine biosynthesis; enzymes form a complex with Arg2p
YLR107W	41.4538	-0.0882234	0.5175	0.990328	41.4538	0.972748	0.619277	0.995869	41.4538	-1.06097	0.807069	0.999985	REX3	RNA exonuclease; required for maturation of the RNA component of RNase MRP; functions redundantly with Rnh70p and Rex2p in processing of U5 snRNA and RNase P RNA; member of RNase D family of exonucleases
YMR061W	94.2884	-0.104445	0.346817	0.984538	94.2884	0.0940854	0.472075	0.995869	94.2884	-0.198531	0.58578	0.999985	RNA14	Cleavage and polyadenylation factor I (CF I) component involved in cleavage and polyadenylation of mRNA 3' ends; bridges interaction between Rna15p and Hrp1p in the CF I complex
YOR027W	709.543	0.331838	0.328816	0.83248	709.543	0.132113	0.442499	0.995869	709.543	0.199725	0.551294	0.999985	STI1	Hsp90 cochaperone, interacts with the Ssa group of the cytosolic Hsp70 chaperones and activates Ssa1p ATPase activity; interacts with Hsp90 chaperones and inhibits their ATPase activity; homolog of mammalian Hop
YLR240W	64.9772	-0.0482064	0.398681	0.994689	64.9772	-0.342243	0.521648	0.995869	64.9772	0.294037	0.656547	0.999985	VPS34	Phosphatidylinositol 3-kinase responsible for the synthesis of phosphatidylinositol 3-phosphate; forms membrane-associated signal transduction complex with Vps15p to regulate protein sorting; activated by the GTP-bound form of Gpa1p
YDR385W	16212.7	0.0805191	0.24113	0.984538	16212.7	-0.0233703	0.329861	0.995869	16212.7	0.103889	0.408598	0.999985	EFT2	Elongation factor 2 (EF-2), also encoded by EFT1; catalyzes ribosomal translocation during protein synthesis; contains diphthamide, the unique posttranslationally modified histidine residue specifically ADP-ribosylated by diphtheria toxin
YJL129C	69.5764	0.270705	0.425266	0.925622	69.5764	-0.124733	0.529601	0.995869	69.5764	0.395438	0.679212	0.999985	TRK1	Component of the Trk1p-Trk2p potassium transport system; 180 kDa high affinity potassium transporter; phosphorylated in vivo and interacts physically with the phosphatase Ppz1p, suggesting Trk1p acitivy is regulated by phosphorylation
YML049C	88.6088	0.12984	0.386711	0.984538	88.6088	-0.201329	0.508198	0.995869	88.6088	0.33117	0.6386	0.999985	RSE1	Protein involved in pre-mRNA splicing; component of the pre-spliceosome; associates with U2 snRNA; involved in ER to Golgi transport
YLR143W	53.64	-0.357001	0.479455	0.903452	53.64	-0.417247	0.596968	0.995869	53.64	0.0602463	0.765653	0.999985		Putative protein of unknown function; green fluorescent protein (GFP)-tagged protein localizes to the cytoplasm; YLR143W is not an essential gene
YOR063W	5739.36	-0.103125	0.259676	0.979652	5739.36	0.0323001	0.353833	0.995869	5739.36	-0.135425	0.438896	0.999985	RPL3	Protein component of the large (60S) ribosomal subunit, has similarity to E. coli L3 and rat L3 ribosomal proteins; involved in the replication and maintenance of killer double stranded RNA virus
YPL218W	415.805	0.0446812	0.261323	0.990328	415.805	0.510082	0.381065	0.995869	415.805	-0.465401	0.462061	0.999985	SAR1	GTPase, GTP-binding protein of the ARF family, component of COPII coat of vesicles; required for transport vesicle formation during ER to Golgi protein transport
YDL224C	61.4723	-0.278084	0.397566	0.90869	61.4723	-0.444808	0.517029	0.995869	61.4723	0.166724	0.652197	0.999985	WHI4	Putative RNA binding protein and partially redundant Whi3p homolog that regulates the cell size requirement for passage through Start and commitment to cell division
YKR067W	81.5665	0.642829	0.377369	0.564468	81.5665	0.484205	0.50167	0.995869	81.5665	0.158625	0.627754	0.999985	GPT2	Glycerol-3-phosphate/dihydroxyacetone phosphate dual substrate-specific sn-1 acyltransferase located in lipid particles and the ER; involved in the stepwise acylation of glycerol-3-phosphate and dihydroxyacetone in lipid biosynthesis
YFL024C	100.131	-0.035249	0.370427	0.995124	100.131	-0.327041	0.482683	0.995869	100.131	0.291792	0.608436	0.999985	EPL1	Component of NuA4, which is an essential histone H4/H2A acetyltransferase complex; homologous to Drosophila Enhancer of Polycomb
YHR200W	239.899	0.136224	0.304789	0.964033	239.899	0.0506556	0.434299	0.995869	239.899	0.0855679	0.530577	0.999985	RPN10	Non-ATPase base subunit of the 19S regulatory particle (RP) of the 26S proteasome; N-terminus plays a role in maintaining the structural integrity of the RP; binds selectively to polyubiquitin chains; homolog of the mammalian S5a protein
YMR124W	70.0188	-0.219694	0.432799	0.95099	70.0188	-0.130201	0.547849	0.995869	70.0188	-0.0894929	0.698176	0.999985		Protein of unknown function; GFP-fusion protein localizes to the cell periphery, cytoplasm, bud, and bud neck; interacts with Crm1p in two-hybrid assay; YMR124W is not an essential gene; predicted to have a role in organelle organization
YOL087C	68.7258	0.136373	0.388164	0.98435	68.7258	0.18156	0.503876	0.995869	68.7258	-0.0451877	0.636053	0.999985		Putative protein of unknown function; green fluorescent protein (GFP)-fusion protein localizes to the cytoplasm; deletion mutant is sensitive to various chemicals including phenanthroline, sanguinarine, and nordihydroguaiaretic acid
YPL260W	140.402	0.0452887	0.36734	0.994689	140.402	0.391304	0.491797	0.995869	140.402	-0.346016	0.613844	0.999985		Putative substrate of cAMP-dependent protein kinase (PKA); green fluorescent protein (GFP)-fusion protein localizes to the cytoplasm and nucleus; YPL260W is not an essential gene
YKL128C	79.5472	-0.324051	0.375888	0.876617	79.5472	-0.420606	0.500556	0.995869	79.5472	0.0965554	0.625967	0.999985	PMU1	Putative phosphomutase, contains a region homologous to the active site of phosphomutases; overexpression suppresses the histidine auxotrophy of an ade3 ade16 ade17 triple mutant and the temperature sensitivity of a tps2 mutant
YMR304W	176.476	0.486184	0.352533	0.67122	176.476	-0.179271	0.473395	0.995869	176.476	0.665455	0.59024	0.999985	UBP15	Ubiquitin-specific protease that may play a role in ubiquitin precursor processing
YDR450W	1359.9	0.136659	0.293051	0.956876	1359.9	0.0962728	0.399994	0.995869	1359.9	0.0403862	0.495857	0.999985	RPS18A	Protein component of the small (40S) ribosomal subunit; nearly identical to Rps18Bp and has similarity to E. coli S13 and rat S18 ribosomal proteins
YKL029C	209.064	0.231825	0.391232	0.936529	209.064	0.0644407	0.512673	0.995869	209.064	0.167384	0.6449	0.999985	MAE1	Mitochondrial malic enzyme, catalyzes the oxidative decarboxylation of malate to pyruvate, which is a key intermediate in sugar metabolism and a precursor for synthesis of several amino acids
YJR123W	4024.35	0.0701109	0.24768	0.984538	4024.35	0.0300171	0.339912	0.995869	4024.35	0.0400938	0.420578	0.999985	RPS5	Protein component of the small (40S) ribosomal subunit, the least basic of the non-acidic ribosomal proteins; phosphorylated in vivo; essential for viability; has similarity to E. coli S7 and rat S5 ribosomal proteins
YHL008C	55.6305	0.141284	0.44033	0.984538	55.6305	-0.131289	0.55512	0.995869	55.6305	0.272572	0.708553	0.999985		Putative protein of unknown function, may be involved in the uptake of chloride ions; does not appear to be involved in monocarboxylic acid transport; green fluorescent protein (GFP)-fusion protein localizes to the vacuole
YNL284C	74.6091	0.301011	0.402993	0.903452	74.6091	-0.59615	0.53883	0.995869	74.6091	0.897161	0.672859	0.999985	MRPL10	Mitochondrial ribosomal protein of the large subunit; appears as two protein spots (YmL10 and YmL18) on two-dimensional SDS gels
YJL208C	52.5881	-0.476106	0.395775	0.762878	52.5881	-0.954211	0.544694	0.995869	52.5881	0.478105	0.673229	0.999985	NUC1	Major mitochondrial nuclease, has RNAse and DNA endo- and exonucleolytic activities; has roles in mitochondrial recombination, apoptosis and maintenance of polyploidy
YOR140W	41.5771	-0.628597	0.478181	0.693162	41.5771	-0.102828	0.583267	0.995869	41.5771	-0.525769	0.754218	0.999985	SFL1	Transcriptional repressor and activator; involved in repression of flocculation-related genes, and activation of stress responsive genes; negatively regulated by cAMP-dependent protein kinase A subunit Tpk2p
YDR068W	81.3117	0.232788	0.386171	0.934355	81.3117	0.155156	0.525775	0.995869	81.3117	0.0776314	0.652356	0.999985	DOS2	Protein of unknown function, green fluorescent protein (GFP)-fusion protein localizes to the cytoplasm
YMR043W	96.3486	-0.115768	0.394019	0.984538	96.3486	-0.146831	0.518699	0.995869	96.3486	0.0310628	0.651381	0.999985	MCM1	Transcription factor involved in cell-type-specific transcription and pheromone response; plays a central role in the formation of both repressor and activator complexes
YLR060W	980.45	0.0932349	0.321576	0.984538	980.45	0.0244054	0.432314	0.995869	980.45	0.0688294	0.538801	0.999985	FRS1	Beta subunit of cytoplasmic phenylalanyl-tRNA synthetase, forms a tetramer with Frs2p to generate active enzyme; able to hydrolyze mis-aminoacylated tRNA-Phe, which could contribute to translational quality control
YLL048C	608.917	-0.0321626	0.310621	0.995084	608.917	-0.315021	0.419462	0.995869	608.917	0.282859	0.521952	0.999985	YBT1	Transporter of the ATP-binding cassette (ABC) family involved in bile acid transport; similar to mammalian bile transporters
YNL248C	152.091	-0.456047	0.357563	0.71659	152.091	-0.437804	0.487935	0.995869	152.091	-0.0182428	0.604917	0.999985	RPA49	RNA polymerase I subunit A49
YCR081W	47.6498	-0.652252	0.447544	0.646744	47.6498	-0.356884	0.564527	0.995869	47.6498	-0.295369	0.720387	0.999985	SRB8	Subunit of the RNA polymerase II mediator complex; associates with core polymerase subunits to form the RNA polymerase II holoenzyme; essential for transcriptional regulation; involved in glucose repression
YEL063C	153.531	0.0831907	0.312136	0.984538	153.531	0.0644102	0.437152	0.995869	153.531	0.0187805	0.537151	0.999985	CAN1	Plasma membrane arginine permease, requires phosphatidyl ethanolamine (PE) for localization, exclusively associated with lipid rafts; mutation confers canavanine resistance
YDL040C	313.361	0.214347	0.275135	0.89321	313.361	-0.0562671	0.384285	0.995869	313.361	0.270614	0.472625	0.999985	NAT1	Subunit of the N-terminal acetyltransferase NatA (Nat1p, Ard1p, Nat5p); N-terminally acetylates many proteins, which influences multiple processes such as the cell cycle, heat-shock resistance, mating, sporulation, and telomeric silencing
YLR420W	227.717	-0.314169	0.387356	0.88906	227.717	-0.121826	0.509113	0.995869	227.717	-0.192343	0.639719	0.999985	URA4	Dihydroorotase, catalyzes the third enzymatic step in the de novo biosynthesis of pyrimidines, converting carbamoyl-L-aspartate into dihydroorotate
YJR066W	189.921	-0.126278	0.312687	0.979286	189.921	-0.119586	0.422126	0.995869	189.921	-0.00669224	0.525322	0.999985	TOR1	PIK-related protein kinase and rapamycin target; subunit of TORC1, a complex that controls growth in response to nutrients by regulating translation, transcription, ribosome biogenesis, nutrient transport and autophagy; involved in meiosis
YHR121W	61.7053	0.173065	0.394427	0.965703	61.7053	-0.619714	0.542002	0.995869	61.7053	0.792779	0.670322	0.999985	LSM12	Protein of unknown function that may function in RNA processing; interacts with Pbp1p and Pbp4p and associates with ribosomes; contains an RNA-binding LSM domain and an AD domain; GFP-fusion protein is induced by the DNA-damaging agent MMS
YIR003W	101.485	0.514485	0.367476	0.664802	101.485	0.0424116	0.495873	0.995869	101.485	0.472074	0.617195	0.999985	AIM21	Protein of unknown function involved in mitochondrial migration along actin filament; may interact with ribosomes; GFP-fusion protein colocalizes with Sac1p to the actin cytoskeleton
YHR020W	920.219	0.0482204	0.25109	0.98971	920.219	-0.2582	0.350026	0.995869	920.219	0.306421	0.430772	0.999985		Protein of unknown function that may interact with ribosomes, based on co-purification experiments; has similarity to proline-tRNA ligase; YHR020W is an essential gene
YLR226W	31.3902	-0.430839	0.503166	0.878354	31.3902	0.141205	0.609268	0.995869	31.3902	-0.572044	0.790193	0.999985	BUR2	Cyclin for the Sgv1p (Bur1p) protein kinase; Sgv1p and Bur2p comprise a CDK-cyclin complex involved in transcriptional regulation through its phosphorylation of the carboxy-terminal domain of the largest subunit of RNA polymerase II
YMR241W	192.282	0.072968	0.309639	0.986813	192.282	0.272898	0.435592	0.995869	192.282	-0.199929	0.534431	0.999985	YHM2	Carrier protein that exports citrate from and imports oxoglutarate into the mitochondrion, causing net export of NADPH reducing equivalents; also associates with mt nucleoids and has a role in replication and segregation of the mt genome
YJL198W	162.117	-0.482197	0.346249	0.670024	162.117	-0.633251	0.470247	0.995869	162.117	0.151055	0.583963	0.999985	PHO90	Low-affinity phosphate transporter; deletion of pho84, pho87, pho89, pho90, and pho91 causes synthetic lethality; transcription independent of Pi and Pho4p activity; overexpression results in vigorous growth
YOR298C-A	341.57	0.186391	0.301361	0.931091	341.57	0.0625312	0.413136	0.995869	341.57	0.12386	0.51137	0.999985	MBF1	Transcriptional coactivator that bridges the DNA-binding region of Gcn4p and TATA-binding protein Spt15p; suppressor of frameshift mutations
YGL103W	1623.1	-0.123141	0.243853	0.952039	1623.1	-0.0634934	0.336228	0.995869	1623.1	-0.0596478	0.415348	0.999985	RPL28	Ribosomal protein of the large (60S) ribosomal subunit, has similarity to E. coli L15 and rat L27a ribosomal proteins; may have peptidyl transferase activity; can mutate to cycloheximide resistance
YGL195W	1574.82	0.129152	0.245508	0.949352	1574.82	-0.0800772	0.338202	0.995869	1574.82	0.20923	0.417917	0.999985	GCN1	Positive regulator of the Gcn2p kinase activity, forms a complex with Gcn20p; proposed to stimulate Gcn2p activation by an uncharged tRNA
YFR053C	1483.69	1.45403	0.592144	0.215575	1483.69	0.585357	0.64431	0.995869	1483.69	0.868675	0.875083	0.999985	HXK1	Hexokinase isoenzyme 1, a cytosolic protein that catalyzes phosphorylation of glucose during glucose metabolism; expression is highest during growth on non-glucose carbon sources; glucose-induced repression involves the hexokinase Hxk2p
YDR217C	56.5543	-0.556507	0.414414	0.676963	56.5543	-0.64071	0.524788	0.995869	56.5543	0.0842025	0.668639	0.999985	RAD9	DNA damage-dependent checkpoint protein, required for cell-cycle arrest in G1/S, intra-S, and G2/M; transmits checkpoint signal by activating Rad53p and Chk1p; hyperphosphorylated by Mec1p and Tel1p; potential Cdc28p substrate
YLL035W	47.8	-0.518901	0.451763	0.798085	47.8	-0.146307	0.56961	0.995869	47.8	-0.372594	0.726995	0.999985	GRC3	Polynucleotide kinase present on rDNA that is required for efficient transcription termination by RNA polymerase I; required for cell growth; mRNA is cell-cycle regulated
YLR059C	74.8159	0.0607853	0.378672	0.990857	74.8159	-0.500593	0.523321	0.995869	74.8159	0.561378	0.645945	0.999985	REX2	3'-5' RNA exonuclease; involved in 3'-end processing of U4 and U5 snRNAs, 5S and 5.8S rRNAs, and RNase P and RNase MRP RNA; localized to mitochondria and null suppresses escape of mtDNA to nucleus in yme1 yme2 mutants; RNase D exonuclease
YOL115W	58.8782	-0.919214	0.418039	0.304514	58.8782	0.286518	0.539455	0.995869	58.8782	-1.20573	0.682491	0.999985	PAP2	Non-canonical poly(A) polymerase, involved in nuclear RNA degradation as a component of the TRAMP complex; catalyzes polyadenylation of hypomodified tRNAs, and snoRNA and rRNA precursors; overlapping but non-redundant functions with Trf5p
YDR051C	55.9032	0.161022	0.428715	0.981235	55.9032	0.0943992	0.550146	0.995869	55.9032	0.0666226	0.697466	0.999985	DET1	Acid phosphatase involved in the non-vesicular transport of sterols in both directions between the endoplasmic reticulum and plasma membrane; deletion confers sensitivity to nickel
YGR250C	74.3661	0.173671	0.379997	0.95746	74.3661	0.336695	0.494959	0.995869	74.3661	-0.163024	0.624007	0.999985		Putative RNA binding protein; localizes to stress granules induced by glucose deprivation; interacts with Rbg1p in a two-hybrid
YKR092C	233.511	-0.997418	0.316504	0.050833	233.511	-0.599927	0.44036	0.995869	233.511	-0.397491	0.542294	0.999985	SRP40	Nucleolar, serine-rich protein with a role in preribosome assembly or transport; may function as a chaperone of small nucleolar ribonucleoprotein particles (snoRNPs); immunologically and structurally to rat Nopp140
YJL033W	148.985	-0.736609	0.369133	0.405401	148.985	-0.963419	0.50227	0.995869	148.985	0.22681	0.623302	0.999985	HCA4	Putative nucleolar DEAD box RNA helicase; high-copy number suppression of a U14 snoRNA processing mutant suggests an involvement in 18S rRNA synthesis
YML070W	474.256	0.847438	0.322199	0.164018	474.256	0.573725	0.444377	0.995869	474.256	0.273714	0.548892	0.999985	DAK1	Dihydroxyacetone kinase, required for detoxification of dihydroxyacetone (DHA); involved in stress adaptation
YBR130C	51.7891	0.390956	0.412786	0.846154	51.7891	-0.24145	0.542658	0.995869	51.7891	0.632405	0.681814	0.999985	SHE3	Protein that acts as an adaptor between Myo4p and the She2p-mRNA complex; part of the mRNA localization machinery that restricts accumulation of certain proteins to the bud; also required for cortical ER inheritance
YLR095C	123.703	-0.149517	0.383332	0.979652	123.703	-0.287266	0.507454	0.995869	123.703	0.137748	0.635963	0.999985	IOC2	Member of a complex (Isw1b) with Isw1p and Ioc4p that exhibits nucleosome-stimulated ATPase activity and acts within coding regions to coordinate transcription elongation with termination and processing, contains a PHD finger motif
YDR411C	88.5842	0.209298	0.361172	0.940196	88.5842	0.675065	0.504844	0.995869	88.5842	-0.465767	0.620738	0.999985	DFM1	ER localized derlin-like family member involved in ER stress and homeostasis; not involved in ERAD or substrate retrotranslocation; interacts with CDC48; contains four transmembrane domains and two SHP boxes
YML117W	152.984	0.240971	0.324772	0.903452	152.984	0.0628493	0.438391	0.995869	152.984	0.178122	0.545586	0.999985	NAB6	Putative RNA-binding protein that associates with mRNAs encoding cell wall proteins in high-throughput studies; deletion mutants display increased sensitivity to some cell wall disrupting agents; expression negatively regulated by cAMP
YNL073W	33.0224	0.333975	0.526134	0.925622	33.0224	0.232718	0.617946	0.995869	33.0224	0.101256	0.811588	0.999985	MSK1	Mitochondrial lysine-tRNA synthetase, required for import of both aminoacylated and deacylated forms of tRNA(Lys) into mitochondria and for aminoacylation of mitochondrially encoded tRNA(Lys)
YDR370C	25.0929	-0.921151	0.548186	0.575861	25.0929	-0.313242	0.627226	0.995869	25.0929	-0.607909	0.832967	0.999985		Putative protein of unknown function
YMR296C	253.074	0.298684	0.296709	0.83248	253.074	-0.328451	0.41357	0.995869	253.074	0.627136	0.508995	0.999985	LCB1	Component of serine palmitoyltransferase, responsible along with Lcb2p for the first committed step in sphingolipid synthesis, which is the condensation of serine with palmitoyl-CoA to form 3-ketosphinganine
YAL038W	19602.7	0.191276	0.23938	0.88906	19602.7	0.279539	0.327636	0.995869	19602.7	-0.0882634	0.405768	0.999985	CDC19	Pyruvate kinase, functions as a homotetramer in glycolysis to convert phosphoenolpyruvate to pyruvate, the input for aerobic (TCA cycle) or anaerobic (glucose fermentation) respiration
YOL151W	228.464	1.3468	0.447329	0.0721904	228.464	1.41833	0.568896	0.731786	228.464	-0.0715213	0.723695	0.999985	GRE2	3-methylbutanal reductase and NADPH-dependent methylglyoxal reductase (D-lactaldehyde dehydrogenase); stress induced (osmotic, ionic, oxidative, heat shock and heavy metals); regulated by the HOG pathway
YLR378C	970.923	0.330078	0.314486	0.824259	970.923	0.178975	0.424242	0.995869	970.923	0.151103	0.528094	0.999985	SEC61	Essential subunit of Sec61 complex (Sec61p, Sbh1p, and Sss1p); forms a channel for SRP-dependent protein import and retrograde transport of misfolded proteins out of the ER; with Sec63 complex allows SRP-independent protein import into ER
YOL036W	71.0336	-0.055675	0.394752	0.99399	71.0336	-0.585177	0.502877	0.995869	71.0336	0.529502	0.639297	0.999985		Protein of unknown function; potential Cdc28p substrate
YHR019C	1295.91	0.141242	0.250032	0.940196	1295.91	0.054395	0.345464	0.995869	1295.91	0.0868468	0.426452	0.999985	DED81	Cytosolic asparaginyl-tRNA synthetase, required for protein synthesis, catalyzes the specific attachment of asparagine to its cognate tRNA
YKR038C	68.3453	-0.129852	0.407198	0.984538	68.3453	-0.135134	0.529142	0.995869	68.3453	0.00528204	0.667681	0.999985	KAE1	Highly conserved putative glycoprotease proposed to be involved in transcription as a component of the EKC protein complex with Bud32p, Cgi121p, Pcc1p, and Gon7p; also identified as a component of the KEOPS protein complex
YJL099W	34.0851	-0.553022	0.468799	0.779839	34.0851	-0.686661	0.582661	0.995869	34.0851	0.133639	0.747786	0.999985	CHS6	Member of the ChAPs family of proteins (Chs5p-Arf1p-binding proteins: Bch1p, Bch2p, Bud7p, Chs6p), that forms the exomer complex with Chs5p to mediate export of specific cargo proteins, including Chs3p, from the Golgi to the plasma membrane
YGL058W	109.93	-0.108636	0.3518	0.984538	109.93	0.0377201	0.501987	0.995869	109.93	-0.146356	0.612988	0.999985	RAD6	Ubiquitin-conjugating enzyme (E2), involved in postreplication repair (as a heterodimer with Rad18p), DSBR and checkpoint control (as a heterodimer with Bre1p), ubiquitin-mediated N-end rule protein degradation (as a heterodimer with Ubr1p
YCR030C	158.676	0.0838682	0.352993	0.986813	158.676	-0.274207	0.471286	0.995869	158.676	0.358075	0.588824	0.999985	SYP1	Protein of unknown function that is involved in endocytic site formation; may regulate assembly and disassembly of the septin ring; colocalizes and interacts with septin subunits; potential role in actin cytoskeletal organization
YPL259C	41.2173	-0.343447	0.471302	0.903452	41.2173	-0.271177	0.580936	0.995869	41.2173	-0.0722709	0.748062	0.999985	APM1	Mu1-like medium subunit of the clathrin-associated protein complex (AP-1); binds clathrin; involved in clathrin-dependent Golgi protein sorting
YGR117C	60.5841	-0.195966	0.395861	0.952862	60.5841	0.00586166	0.518299	0.995869	60.5841	-0.201828	0.65218	0.999985		Putative protein of unknown function; green fluorescent protein (GFP)-fusion protein localizes to the cytoplasm
YBR112C	205.331	-0.0279593	0.295362	0.995124	205.331	-0.228554	0.40594	0.995869	205.331	0.200595	0.502021	0.999985	CYC8	General transcriptional co-repressor, acts together with Tup1p; also acts as part of a transcriptional co-activator complex that recruits the SWI/SNF and SAGA complexes to promoters; can form the prion
YLR194C	72.4543	-1.05392	0.49577	0.334459	72.4543	-0.426649	0.605317	0.995869	72.4543	-0.627274	0.782345	0.999985		Structural constituent of the cell wall attached to the plasma membrane by a GPI-anchor; expression is upregulated in response to cell wall stress
YDL178W	103.227	0.288003	0.355307	0.88906	103.227	0.267666	0.493722	0.995869	103.227	0.0203366	0.608281	0.999985	DLD2	D-lactate dehydrogenase, located in the mitochondrial matrix
YNL172W	79.4027	-0.642804	0.391627	0.588014	79.4027	-0.379706	0.507227	0.995869	79.4027	-0.263098	0.64081	0.999985	APC1	Largest subunit of the Anaphase-Promoting Complex/Cyclosome (APC/C), which is a ubiquitin-protein ligase required for degradation of anaphase inhibitors, including mitotic cyclins, during the metaphase/anaphase transition
YKL212W	355.537	0.143851	0.275365	0.949352	355.537	0.128275	0.390049	0.995869	355.537	0.0155757	0.477456	0.999985	SAC1	Phosphatidylinositol phosphate (PtdInsP) phosphatase involved in hydrolysis of PtdIns
YCL018W	71.5288	0.888856	0.42471	0.350511	71.5288	1.74819	0.575063	0.316297	71.5288	-0.859334	0.71485	0.999985	LEU2	Beta-isopropylmalate dehydrogenase (IMDH), catalyzes the third step in the leucine biosynthesis pathway
YPR114W	62.9156	0.145098	0.41483	0.98435	62.9156	-0.22742	0.546197	0.995869	62.9156	0.372518	0.685865	0.999985		Putative protein of unknown function
YJL055W	90.5879	0.568214	0.370163	0.625752	90.5879	-1.08233	0.523773	0.995869	90.5879	1.65055	0.641382	0.999985		Putative protein of unknown function, proposed to be involved in the metabolism of purine and pyrimidine base analogues; deletion mutants are sensitive to HAP and AHA; overexpression confers resistance to 5-FOA and 5-FU
YER036C	884.414	-0.131229	0.254407	0.949667	884.414	-0.263972	0.35513	0.995869	884.414	0.132743	0.436852	0.999985	ARB1	ATPase of the ATP-binding cassette (ABC) family involved in 40S and 60S ribosome biogenesis, has similarity to Gcn20p; shuttles from nucleus to cytoplasm, physically interacts with Tif6p, Lsg1p
YER151C	200.17	0.0988298	0.311553	0.984538	200.17	-0.0263273	0.431081	0.995869	200.17	0.125157	0.531879	0.999985	UBP3	Ubiquitin-specific protease that interacts with Bre5p to co-regulate anterograde and retrograde transport between the ER and Golgi; inhibitor of gene silencing; cleaves ubiquitin fusions but not polyubiquitin; also has mRNA binding activity
YLR158C	70.4047	2.5739	0.543564	0.000292553	70.4047	0.0505326	0.55808	0.995869	70.4047	2.52336	0.779025	0.999985	ASP3-3	Cell-wall L-asparaginase II involved in asparagine catabolism; expression induced during nitrogen starvation; ORF contains a short non-coding RNA that enhances expression of full-length gene; reference strain S288C has four copies of ASP3
YLR396C	58.1977	-0.427191	0.423662	0.83248	58.1977	-0.227033	0.546394	0.995869	58.1977	-0.200158	0.691392	0.999985	VPS33	ATP-binding protein that is a subunit of the HOPS complex and of the CORVET tethering complex; essential for protein sorting, vesicle docking and fusion at the vacuole
YML052W	418.531	-0.775339	0.314239	0.212466	418.531	-0.717956	0.428499	0.995869	418.531	-0.0573828	0.531372	0.999985	SUR7	Plasma membrane protein that localizes to furrow-like invaginations (MCC patches); component of eisosomes; associated with endocytosis, along with Pil1p and Lsp1p; sporulation and plasma membrane sphingolipid content are altered in mutants
YIL056W	48.9788	-0.303199	0.456943	0.918407	48.9788	-0.0432696	0.562371	0.995869	48.9788	-0.25993	0.724607	0.999985	VHR1	Transcriptional activator, required for the vitamin H-responsive element (VHRE) mediated induction of VHT1 (Vitamin H transporter) and BIO5 (biotin biosynthesis intermediate transporter) in response to low biotin concentrations
YKL067W	199.795	1.3238	0.330192	0.00425826	199.795	0.792265	0.463709	0.995869	199.795	0.531531	0.569246	0.999985	YNK1	Nucleoside diphosphate kinase, catalyzes the transfer of gamma phosphates from nucleoside triphosphates, usually ATP, to nucleoside diphosphates by a mechanism that involves formation of an autophosphorylated enzyme intermediate
YDR224C	483.646	-0.0511279	0.428879	0.994689	483.646	-0.420145	0.547567	0.995869	483.646	0.369017	0.695532	0.999985	HTB1	Histone H2B, core histone protein required for chromatin assembly and chromosome function; nearly identical to HTB2; Rad6p-Bre1p-Lge1p mediated ubiquitination regulates transcriptional activation, meiotic DSB formation and H3 methylation
YDR026C	30.1108	0.541649	0.486313	0.807837	30.1108	-0.0301209	0.589887	0.995869	30.1108	0.571769	0.764505	0.999985		Protein of unknown function that may interact with ribosomes, based on co-purification experiments; Myb-like DNA-binding protein that may bind to the Ter region of rDNA; interacts physically with Fob1p
YOR312C	2215.7	-0.122218	0.271677	0.961853	2215.7	0.01197	0.371342	0.995869	2215.7	-0.134188	0.460112	0.999985	RPL20B	Protein component of the large (60S) ribosomal subunit, nearly identical to Rpl20Ap and has similarity to rat L18a ribosomal protein
YPL086C	128.401	-0.266938	0.32035	0.887234	128.401	-0.608858	0.459787	0.995869	128.401	0.34192	0.560373	0.999985	ELP3	Subunit of Elongator complex, which is required for modification of wobble nucleosides in tRNA; exhibits histone acetyltransferase activity that is directed to histones H3 and H4; disruption confers resistance to K. lactis zymotoxin
YGR106C	343.734	-0.116782	0.274692	0.971362	343.734	0.109392	0.396824	0.995869	343.734	-0.226174	0.482623	0.999985	VOA1	Endoplasmic reticulum protein that functions, together with other assembly factors, in assembly of the V0 sector of the vacuolar ATPase (V-ATPase); null mutation enhances the V-ATPase deficiency of a vma21 mutant impaired in ER retrieval
YGR241C	63.2467	-0.600274	0.391227	0.625752	63.2467	-0.30245	0.509416	0.995869	63.2467	-0.297823	0.642298	0.999985	YAP1802	Protein involved in clathrin cage assembly; binds Pan1p and clathrin; homologous to Yap1801p, member of the AP180 protein family
YDR422C	71.1011	-0.140371	0.377486	0.981235	71.1011	0.248511	0.497923	0.995869	71.1011	-0.388882	0.624843	0.999985	SIP1	Alternate beta-subunit of the Snf1p kinase complex, may confer substrate specificity; vacuolar protein containing KIS (Kinase-Interacting Sequence) and ASC (Association with Snf1 kinase Complex) domains involved in protein interactions
YNL242W	43.1856	0.622717	0.44818	0.670024	43.1856	0.240705	0.562243	0.995869	43.1856	0.382012	0.719011	0.999985	ATG2	Peripheral membrane protein required for vesicle formation during autophagy, pexophagy, and the cytoplasm-to-vaucole targeting (Cvt) pathway; involved in Atg9p cycling between the phagophore assembly site and mitochondria
YPR062W	256.765	0.0334489	0.291472	0.994689	256.765	-0.0515802	0.408427	0.995869	256.765	0.0850291	0.501765	0.999985	FCY1	Cytosine deaminase, zinc metalloenzyme that catalyzes the hydrolytic deamination of cytosine to uracil; of biomedical interest because it also catalyzes the deamination of 5-fluorocytosine (5FC) to form anticancer drug 5-fluorouracil (5FU)
YBR222C	151.121	0.185777	0.328765	0.940196	151.121	0.150178	0.458893	0.995869	151.121	0.0355989	0.564508	0.999985	PCS60	Peroxisomal protein that binds AMP and mRNA, localizes to both the peroxisomal peripheral membrane and matrix, expression is highly inducible by oleic acid, similar to E. coli long chain acyl-CoA synthetase
YCR047C	109.264	-0.324542	0.360062	0.867711	109.264	-0.157059	0.505767	0.995869	109.264	-0.167483	0.620837	0.999985	BUD23	Methyltransferase, methylates residue G1575 of 18S rRNA; required for rRNA processing and nuclear export of 40S ribosomal subunits independently of methylation activity; diploid mutant displays random budding pattern
YDL248W	122.226	0.234752	0.340792	0.909938	122.226	0.339212	0.469514	0.995869	122.226	-0.10446	0.580158	0.999985	COS7	Protein of unknown function, member of the DUP380 subfamily of conserved, often subtelomerically-encoded proteins; the authentic, non-tagged protein is detected in highly purified mitochondria in high-throughput studies
YBR121C	1401.94	0.191184	0.256075	0.903452	1401.94	-0.096116	0.355277	0.995869	1401.94	0.2873	0.437946	0.999985	GRS1	Cytoplasmic and mitochondrial glycyl-tRNA synthase that ligates glycine to the cognate anticodon bearing tRNA; transcription termination factor that may interact with the 3'-end of pre-mRNA to promote 3'-end formation
YLL006W	36.707	-0.284073	0.503695	0.940196	36.707	-0.0553053	0.604819	0.995869	36.707	-0.228768	0.78709	0.999985	MMM1	ER integral membrane protein, component of the ERMES complex that links the ER to mitochondria and may promote inter-organellar calcium and phospholipid exchange as well as coordinating mitochondrial DNA replication and growth
YPR026W	46.3504	1.11386	0.494086	0.282298	46.3504	0.686047	0.598439	0.995869	46.3504	0.427814	0.776024	0.999985	ATH1	Acid trehalase required for utilization of extracellular trehalose
YNL141W	70.9226	-1.51098	0.491524	0.062162	70.9226	-1.27305	0.608023	0.995869	70.9226	-0.237931	0.781736	0.999985	AAH1	Adenine deaminase (adenine aminohydrolase), converts adenine to hypoxanthine; involved in purine salvage; transcriptionally regulated by nutrient levels and growth phase; Aah1p degraded upon entry into quiescence via SCF and the proteasome
YJL145W	63.3375	-0.304065	0.393265	0.896023	63.3375	-0.046458	0.552242	0.995869	63.3375	-0.257607	0.677957	0.999985	SFH5	Non-classical phosphatidylinositol transfer protein (PITP); exhibits PI- but not PC-transfer activity; localizes to the peripheral endoplasmic reticulum, cytosol and microsomes; similar to Sec14p
YPR127W	73.5955	0.961876	0.365102	0.163344	73.5955	-0.0311566	0.516301	0.995869	73.5955	0.993032	0.632351	0.999985		Protein of unknown function, differentially expressed during alcoholic fermentation; expression activated by transcription factor YRM1/YOR172W; green fluorescent protein (GFP)-fusion protein localizes to both the cytoplasm and the nucleus
YGR043C	410.296	2.04745	0.344149	1.03505e-06	410.296	1.78382	0.485692	0.0567624	410.296	0.263629	0.595239	0.999985	NQM1	Transaldolase of unknown function; transcription is repressed by Mot1p and induced by alpha-factor and during diauxic shift
YDR361C	92.9535	-0.668608	0.375042	0.529964	92.9535	-0.376707	0.515742	0.995869	92.9535	-0.291901	0.637673	0.999985	BCP1	Essential protein involved in nuclear export of Mss4p, which is a lipid kinase that generates phosphatidylinositol 4,5-biphosphate and plays a role in actin cytoskeleton organization and vesicular transport
YMR287C	32.0718	-0.360079	0.501993	0.903452	32.0718	-0.233652	0.600959	0.995869	32.0718	-0.126427	0.783024	0.999985	DSS1	3'-5' exoribonuclease, component of the mitochondrial degradosome along with the ATP-dependent RNA helicase Suv3p; the degradosome associates with the ribosome and mediates turnover of aberrant or unprocessed RNAs
YMR049C	298.484	-0.545505	0.328683	0.583343	298.484	-0.576699	0.453769	0.995869	298.484	0.0311944	0.560298	0.999985	ERB1	Constituent of 66S pre-ribosomal particles, forms a complex with Nop7p and Ytm1p that is required for maturation of the large ribosomal subunit; required for maturation of the 25S and 5.8S ribosomal RNAs; homologous to mammalian Bop1
YIL021W	86.7978	-0.503574	0.367017	0.673247	86.7978	-0.0927441	0.496774	0.995869	86.7978	-0.410829	0.617644	0.999985	RPB3	RNA polymerase II third largest subunit B44, part of central core; similar to prokaryotic alpha subunit
YDL086W	102.172	0.498407	0.350772	0.653488	102.172	0.370273	0.49976	0.995869	102.172	0.128134	0.610572	0.999985		Putative protein of unknown function; the authentic, non-tagged protein is detected in highly purified mitochondria in high-throughput studies; YDL086W is not an essential gene
YHL002W	53.4077	0.101864	0.394921	0.984538	53.4077	0.488898	0.536471	0.995869	53.4077	-0.387034	0.666163	0.999985	HSE1	Subunit of the endosomal Vps27p-Hse1p complex required for sorting of ubiquitinated membrane proteins into intralumenal vesicles prior to vacuolar degradation, as well as for recycling of Golgi proteins and formation of lumenal membranes
YGL148W	453.947	-0.0562702	0.278286	0.98971	453.947	0.0527497	0.387339	0.995869	453.947	-0.10902	0.476943	0.999985	ARO2	Bifunctional chorismate synthase and flavin reductase, catalyzes the conversion of 5-enolpyruvylshikimate 3-phosphate (EPSP) to form chorismate, which is a precursor to aromatic amino acids
YHR008C	399.124	0.945621	0.395942	0.230318	399.124	0.553062	0.514395	0.995869	399.124	0.392559	0.649132	0.999985	SOD2	Mitochondrial superoxide dismutase, protects cells against oxygen toxicity; phosphorylated
YKR029C	44.475	-0.154393	0.492982	0.984538	44.475	-0.737179	0.598343	0.995869	44.475	0.582786	0.775254	0.999985	SET3	Defining member of the SET3 histone deacetylase complex which is a meiosis-specific repressor of sporulation genes; necessary for efficient transcription by RNAPII; one of two yeast proteins that contains both SET and PHD domains
YDR488C	34.6362	0.660951	0.478776	0.67122	34.6362	0.422137	0.59224	0.995869	34.6362	0.238814	0.761541	0.999985	PAC11	Dynein intermediate chain, acts in the cytoplasmic dynein pathway, forms cortical cytoplasmic microtubule capture site with Num1p; null mutant is defective in nuclear migration, essential in the absence of CIN8
YKL045W	55.2215	1.01209	0.432916	0.249674	55.2215	0.784683	0.565497	0.995869	55.2215	0.227405	0.71214	0.999985	PRI2	Subunit of DNA primase, which is required for DNA synthesis and double-strand break repair
YDR105C	63.341	0.371576	0.390751	0.846154	63.341	-0.105808	0.538753	0.995869	63.341	0.477383	0.665539	0.999985	TMS1	Vacuolar membrane protein of unknown function that is conserved in mammals; predicted to contain eleven transmembrane helices; interacts with Pdr5p, a protein involved in multidrug resistance
YOL140W	41.0784	0.0735917	0.485827	0.991029	41.0784	-0.45777	0.600279	0.995869	41.0784	0.531362	0.772238	0.999985	ARG8	Acetylornithine aminotransferase, catalyzes the fourth step in the biosynthesis of the arginine precursor ornithine
YDR343C	1493.61	0.768708	0.607312	0.719922	1493.61	0.350034	0.646131	0.995869	1493.61	0.418673	0.886743	0.999985	HXT6	High-affinity glucose transporter of the major facilitator superfamily, nearly identical to Hxt7p, expressed at high basal levels relative to other HXTs, repression of expression by high glucose requires SNF3
YBR002C	45.136	-0.060089	0.426523	0.99399	45.136	-0.562638	0.565748	0.995869	45.136	0.502549	0.708493	0.999985	RER2	Cis-prenyltransferase involved in dolichol synthesis; participates in endoplasmic reticulum (ER) protein sorting
YLR084C	129.276	-0.970862	0.379006	0.177829	129.276	-0.636179	0.485085	0.995869	129.276	-0.334684	0.615572	0.999985	RAX2	N-glycosylated protein involved in the maintenance of bud site selection during bipolar budding; localization requires Rax1p; RAX2 mRNA stability is regulated by Mpt5p
YHR080C	46.0972	0.679143	0.496608	0.673247	46.0972	0.111801	0.589482	0.995869	46.0972	0.567341	0.770782	0.999985		Protein of unknown function that may interact with ribosomes, based on co-purification experiments; the authentic, non-tagged protein is detected in highly purified mitochondria in high-throughput studies
YML007W	80.5257	0.57321	0.381495	0.629533	80.5257	0.19401	0.508083	0.995869	80.5257	0.3792	0.635362	0.999985	YAP1	Basic leucine zipper (bZIP) transcription factor required for oxidative stress tolerance; activated by H2O2 through the multistep formation of disulfide bonds and transit from the cytoplasm to the nucleus; mediates resistance to cadmium
YML106W	283.287	-0.0535673	0.29119	0.98971	283.287	-0.051866	0.409228	0.995869	283.287	-0.0017013	0.502254	0.999985	URA5	Major orotate phosphoribosyltransferase (OPRTase) isozyme that catalyzes the fifth enzymatic step in de novo biosynthesis of pyrimidines, converting orotate into orotidine-5'-phosphate; minor OPRTase encoded by URA10
YJL167W	442.793	0.329373	0.291222	0.802954	442.793	0.208452	0.405434	0.995869	442.793	0.120921	0.499186	0.999985	ERG20	Farnesyl pyrophosphate synthetase, has both dimethylallyltranstransferase and geranyltranstransferase activities; catalyzes the formation of C15 farnesyl pyrophosphate units for isoprenoid and sterol biosynthesis
YHR016C	71.41	1.08643	0.417795	0.170435	71.41	1.37206	0.552418	0.731786	71.41	-0.285623	0.692585	0.999985	YSC84	Actin-binding protein involved in bundling of actin filaments and endocytosis of actin cortical patches; activity stimulated by Las17p; contains SH3 domain similar to Rvs167p
YPL169C	103.021	-0.228527	0.375387	0.933902	103.021	-0.194132	0.502025	0.995869	103.021	-0.0343949	0.62685	0.999985	MEX67	Poly(A)RNA binding protein involved in nuclear mRNA export, component of the nuclear pore; ortholog of human TAP
YER027C	78.6619	0.406645	0.379949	0.82201	78.6619	0.32014	0.518311	0.995869	78.6619	0.086505	0.642656	0.999985	GAL83	One of three possible beta-subunits of the Snf1 kinase complex, allows nuclear localization of the Snf1 kinase complex in the presence of a nonfermentable carbon source; contains glycogen-binding domain
YNL127W	42.5544	-0.148282	0.44212	0.984538	42.5544	-0.081436	0.561446	0.995869	42.5544	-0.0668461	0.714623	0.999985	FAR11	Protein involved in recovery from cell cycle arrest in response to pheromone, in a Far1p-independent pathway; interacts with Far3p, Far7p, Far8p, Far9p, and Far10p; has similarity to the N- and C-termini of N. crassa HAM-2
YER126C	164.39	-0.293453	0.368741	0.88906	164.39	-0.792752	0.498248	0.995869	164.39	0.499299	0.619847	0.999985	NSA2	Protein constituent of 66S pre-ribosomal particles, contributes to processing of the 27S pre-rRNA
YBR046C	84.5767	0.734873	0.3696	0.408655	84.5767	0.58232	0.517831	0.995869	84.5767	0.152553	0.636193	0.999985	ZTA1	NADPH-dependent quinone reductase, GFP-tagged protein localizes to the cytoplasm and nucleus; has similarity to E. coli quinone oxidoreductase and to human zeta-crystallin
YLR387C	95.408	0.152121	0.360627	0.972424	95.408	0.414284	0.496388	0.995869	95.408	-0.262163	0.613561	0.999985	REH1	Cytoplasmic 60S subunit biogenesis factor, associates with pre-60S particles; similar to Rei1p and shares partially redundant function in cytoplasmic 60S subunit maturation; contains dispersed C2H2 zinc finger domains
YGR061C	1400.62	0.0243507	0.267846	0.995495	1400.62	-0.177928	0.368165	0.995869	1400.62	0.202279	0.455288	0.999985	ADE6	Formylglycinamidine-ribonucleotide (FGAM)-synthetase, catalyzes a step in the 'de novo' purine nucleotide biosynthetic pathway
YDR040C	470.503	-0.402132	0.276101	0.646744	470.503	-0.287111	0.381088	0.995869	470.503	-0.115021	0.470595	0.999985	ENA1	P-type ATPase sodium pump, involved in Na+ and Li+ efflux to allow salt tolerance
YBR288C	63.9334	-0.0117534	0.389802	0.997966	63.9334	0.115113	0.524694	0.995869	63.9334	-0.126867	0.653645	0.999985	APM3	Mu3-like subunit of the clathrin associated protein complex (AP-3); functions in transport of alkaline phosphatase to the vacuole via the alternate pathway
YDR141C	176.193	0.0653735	0.314915	0.98971	176.193	-0.511931	0.429146	0.995869	176.193	0.577305	0.532294	0.999985	DOP1	Golgi-localized, leucine-zipper domain containing protein; involved in endosome to Golgi transport, organization of the ER, establishing cell polarity, and morphogenesis; detected in highly purified mitochondria in high-throughput studies
YKL089W	30.8787	0.542006	0.481032	0.802954	30.8787	0.413628	0.599168	0.995869	30.8787	0.128378	0.76836	0.999985	MIF2	Kinetochore protein with homology to human CENP-C, required for structural integrity of the spindle during anaphase spindle elongation, interacts with histones H2A, H2B, and H4, phosphorylated by Ipl1p
YNL069C	2542.04	0.180846	0.247007	0.903452	2542.04	0.136076	0.341358	0.995869	2542.04	0.04477	0.421353	0.999985	RPL16B	N-terminally acetylated protein component of the large (60S) ribosomal subunit, binds to 5.8 S rRNA; has similarity to Rpl16Ap, E. coli L13 and rat L13a ribosomal proteins; transcriptionally regulated by Rap1p
YNL154C	151.414	0.134154	0.328266	0.979013	151.414	-0.411639	0.447519	0.995869	151.414	0.545792	0.555005	0.999985	YCK2	Palmitoylated plasma membrane-bound casein kinase I isoform; shares redundant functions with Yck1p in morphogenesis, proper septin assembly, endocytic trafficking; provides an essential function overlapping with that of Yck1p
YER177W	1293.62	0.405271	0.261485	0.623582	1293.62	0.454713	0.363707	0.995869	1293.62	-0.0494419	0.447948	0.999985	BMH1	14-3-3 protein, major isoform; controls proteome at post-transcriptional level, binds proteins and DNA, involved in regulation of many processes including exocytosis, vesicle transport, Ras/MAPK signaling, and rapamycin-sensitive signaling
YDR176W	59.7628	-0.331029	0.401674	0.887234	59.7628	-0.500025	0.506341	0.995869	59.7628	0.168996	0.646292	0.999985	NGG1	Transcriptional regulator involved in glucose repression of Gal4p-regulated genes; component of transcriptional adaptor and histone acetyltransferase complexes, the ADA complex, the SAGA complex, and the SLIK complex
YLR019W	95.4789	-0.335922	0.394425	0.88009	95.4789	-0.122488	0.514174	0.995869	95.4789	-0.213434	0.64803	0.999985	PSR2	Functionally redundant Psr1p homolog, a plasma membrane phosphatase involved in the general stress response; required with Psr1p and Whi2p for full activation of STRE-mediated gene expression, possibly through dephosphorylation of Msn2p
YGR056W	55.5981	-0.773994	0.428358	0.519445	55.5981	-0.644624	0.545247	0.995869	55.5981	-0.12937	0.69335	0.999985	RSC1	Component of the RSC chromatin remodeling complex; required for expression of mid-late sporulation-specific genes; contains two essential bromodomains, a bromo-adjacent homology (BAH) domain, and an AT hook
YDR011W	569.499	0.0673714	0.390569	0.990328	569.499	-0.00207148	0.503827	0.997368	569.499	0.0694429	0.637484	0.999985	SNQ2	Plasma membrane ATP-binding cassette (ABC) transporter, multidrug transporter involved in multidrug resistance and resistance to singlet oxygen species
YOL155C	198.043	0.901385	0.467742	0.441355	198.043	1.21604	0.576671	0.995869	198.043	-0.31465	0.742515	0.999985	HPF1	Haze-protective mannoprotein that reduces the particle size of aggregated proteins in white wines
YKL151C	118.238	0.826392	0.448565	0.491645	118.238	0.806827	0.565445	0.995869	118.238	0.0195654	0.721757	0.999985		Putative protein of unknown function; YKL151C promoter contains STREs (stress response elements) and expression is induced by heat shock or methyl methanesulfonate; green fluorescent protein (GFP)-fusion protein localizes to the cytoplasm
YCR052W	111.058	-0.314473	0.33657	0.848304	111.058	-0.499269	0.47051	0.995869	111.058	0.184796	0.578489	0.999985	RSC6	Component of the RSC chromatin remodeling complex; essential for mitotic growth; homolog of SWI/SNF subunit Swp73p
YAR050W	26.2025	-0.224199	0.624127	0.982785	26.2025	-0.126477	0.540315	0.995869	26.2025	-0.097722	0.825515	0.999985	FLO1	Lectin-like protein involved in flocculation, cell wall protein that binds to mannose chains on the surface of other cells, confers floc-forming ability that is chymotrypsin sensitive and heat resistant; similar to Flo5p
YFR013W	72.8986	0.0485345	0.373424	0.994327	72.8986	-0.13472	0.493053	0.995869	72.8986	0.183255	0.618502	0.999985	IOC3	Member of a complex (Isw1a) with Isw1p that has nucleosome-stimulated ATPase activity and represses transcription initiation by specific positioning of a promoter proximal dinucleosome; has homology to Esc8p, which is involved in silencing
YDR099W	571.688	0.259681	0.319966	0.88906	571.688	0.386843	0.433761	0.995869	571.688	-0.127162	0.539005	0.999985	BMH2	14-3-3 protein, minor isoform; controls proteome at post-transcriptional level, binds proteins and DNA, involved in regulation of many processes including exocytosis, vesicle transport, Ras/MAPK signaling, and rapamycin-sensitive signaling
YIL034C	65.5374	-0.0604112	0.381546	0.990857	65.5374	0.00584059	0.515107	0.995869	65.5374	-0.0662518	0.641024	0.999985	CAP2	Beta subunit of the capping protein (CP) heterodimer (Cap1p and Cap2p) which binds to the barbed ends of actin filaments preventing further polymerization; localized predominantly to cortical actin patches
YOL111C	74.3656	0.0595495	0.370224	0.990857	74.3656	-0.229722	0.525208	0.995869	74.3656	0.289272	0.642576	0.999985	MDY2	Protein with a role in insertion of tail-anchored proteins into the ER membrane; forms a complex with Get4p; required for efficient mating; involved in shmoo formation and nuclear migration in the pre-zygote; associates with ribosomes
YCR016W	71.481	-0.57348	0.39595	0.646744	71.481	-0.897073	0.538769	0.995869	71.481	0.323594	0.668563	0.999985		Putative protein of unknown function; green fluorescent protein (GFP)-fusion protein localizes to the nucleolus and nucleus; predicted to be involved in ribosome biogenesis
YDR213W	37.9623	-0.303417	0.449089	0.916037	37.9623	-0.102191	0.567542	0.995869	37.9623	-0.201226	0.723722	0.999985	UPC2	Sterol regulatory element binding protein, induces transcription of sterol biosynthetic genes and of DAN/TIR gene products; Ecm22p homolog; relocates from intracellular membranes to perinuclear foci on sterol depletion
YHL035C	101.309	0.165616	0.38075	0.967482	101.309	0.270726	0.477183	0.995869	101.309	-0.10511	0.610472	0.999985	VMR1	Vacuolar membrane protein involved in multiple drug resistance and metal sensitivity; ATP-binding cassette (ABC) family member involved in drug transport; potential Cdc28p substrate; induced under respiratory conditions
YML074C	1107.6	0.210066	0.310653	0.915907	1107.6	0.0643297	0.420973	0.995869	1107.6	0.145736	0.523185	0.999985	FPR3	Nucleolar peptidyl-prolyl cis-trans isomerase (PPIase); FK506 binding protein; phosphorylated by casein kinase II (Cka1p-Cka2p-Ckb1p-Ckb2p) and dephosphorylated by Ptp1p
YIL070C	66.7645	-0.0311672	0.432481	0.996333	66.7645	0.626378	0.551097	0.995869	66.7645	-0.657545	0.700541	0.999985	MAM33	Acidic protein of the mitochondrial matrix involved in oxidative phosphorylation; related to the human complement receptor gC1q-R
YNL110C	73.873	-0.865141	0.382063	0.281122	73.873	-0.536199	0.538057	0.995869	73.873	-0.328942	0.659842	0.999985	NOP15	Constituent of 66S pre-ribosomal particles, involved in 60S ribosomal subunit biogenesis; localizes to both nucleolus and cytoplasm
YLR459W	76.0586	-0.0368547	0.423922	0.995495	76.0586	-0.373084	0.558984	0.995869	76.0586	0.336229	0.701544	0.999985	GAB1	GPI transamidase subunit, involved in attachment of glycosylphosphatidylinositol (GPI) anchors to proteins; may have a role in recognition of the attachment signal or of the lipid portion of GPI
YOR092W	44.433	-0.190385	0.466791	0.979013	44.433	-0.323375	0.587467	0.995869	44.433	0.13299	0.750333	0.999985	ECM3	Non-essential protein of unknown function; involved in signal transduction and the genotoxic response; induced rapidly in response to treatment with 8-methoxypsoralen and UVA irradiation
YNL231C	122.067	0.890403	0.362415	0.215575	122.067	0.587732	0.487288	0.995869	122.067	0.302672	0.607277	0.999985	PDR16	Phosphatidylinositol transfer protein (PITP) controlled by the multiple drug resistance regulator Pdr1p, localizes to lipid particles and microsomes, controls levels of various lipids, may regulate lipid synthesis, homologous to Pdr17p
YDR055W	73.6826	-1.28764	0.469292	0.128799	73.6826	-0.679457	0.577536	0.995869	73.6826	-0.608183	0.744136	0.999985	PST1	Cell wall protein that contains a putative GPI-attachment site; secreted by regenerating protoplasts; up-regulated by activation of the cell integrity pathway, as mediated by Rlm1p; upregulated by cell wall damage via disruption of FKS1
YGR254W	20434.6	0.678228	0.264504	0.17768	20434.6	0.648715	0.359007	0.995869	20434.6	0.0295129	0.445924	0.999985	ENO1	Enolase I, a phosphopyruvate hydratase that catalyzes the conversion of 2-phosphoglycerate to phosphoenolpyruvate during glycolysis and the reverse reaction during gluconeogenesis; expression is repressed in response to glucose
YLL031C	153.595	0.0718903	0.372706	0.98971	153.595	-0.0545337	0.490311	0.995869	153.595	0.126424	0.615886	0.999985	GPI13	ER membrane localized phosphoryltransferase that adds phosphoethanolamine onto the third mannose residue of the glycosylphosphatidylinositol (GPI) anchor precursor; similar to human PIG-O protein
YKR096W	65.8899	-0.127344	0.39526	0.984538	65.8899	-0.376266	0.50601	0.995869	65.8899	0.248922	0.64208	0.999985		Protein of unknown function that may interact with ribosomes, based on co-purification experiments; green fluorescent protein (GFP)-fusion protein localizes to the nucleus and cytoplasm; predicted to contain a PINc domain
YMR125W	164.668	-0.161606	0.332328	0.952862	164.668	-0.324564	0.451728	0.995869	164.668	0.162958	0.560801	0.999985	STO1	Large subunit of the nuclear mRNA cap-binding protein complex, interacts with Npl3p to carry nuclear poly(A)+ mRNA to cytoplasm; also involved in nuclear mRNA degradation and telomere maintenance; orthologous to mammalian CBP80
YPR110C	272.162	-0.442267	0.3344	0.687362	272.162	-0.409243	0.468866	0.995869	272.162	-0.0330238	0.575895	0.999985	RPC40	RNA polymerase subunit AC40, common to RNA polymerase I and III
YNL330C	87.1497	-0.124355	0.343248	0.98227	87.1497	-0.179183	0.479988	0.995869	87.1497	0.0548288	0.590088	0.999985	RPD3	Histone deacetylase; regulates transcription, silencing, and other processes by influencing chromatin remodeling; forms at least two different complexes which have distinct functions and members
YGR157W	382.657	0.224909	0.323496	0.908815	382.657	0.0777796	0.436552	0.995869	382.657	0.147129	0.543348	0.999985	CHO2	Phosphatidylethanolamine methyltransferase (PEMT), catalyzes the first step in the conversion of phosphatidylethanolamine to phosphatidylcholine during the methylation pathway of phosphatidylcholine biosynthesis
YLL013C	117.882	-0.108801	0.377903	0.984538	117.882	-0.40927	0.495917	0.995869	117.882	0.30047	0.62349	0.999985	PUF3	Protein of the mitochondrial outer surface, links the Arp2/3 complex with the mitochore during anterograde mitochondrial movement; also binds to and promotes degradation of mRNAs for select nuclear-encoded mitochondrial proteins
YNL055C	614.091	0.665198	0.290983	0.274548	614.091	0.968545	0.402155	0.820279	614.091	-0.303347	0.496386	0.999985	POR1	Mitochondrial porin (voltage-dependent anion channel), outer membrane protein required for the maintenance of mitochondrial osmotic stability and mitochondrial membrane permeability; phosphorylated
YOL098C	241.597	-0.0563	0.290971	0.98971	241.597	0.232988	0.40977	0.995869	241.597	-0.289288	0.502569	0.999985		Putative metalloprotease
YKL014C	260.054	-0.328571	0.296051	0.808298	260.054	-0.889593	0.410809	0.995869	260.054	0.561022	0.506366	0.999985	URB1	Nucleolar protein required for the normal accumulation of 25S and 5.8S rRNAs, associated with the 27SA2 pre-ribosomal particle; proposed to be involved in the biogenesis of the 60S ribosomal subunit
YDR077W	2095.47	-0.684099	0.301063	0.28075	2095.47	-0.506781	0.404036	0.995869	2095.47	-0.177318	0.503868	0.999985	SED1	Major stress-induced structural GPI-cell wall glycoprotein in stationary-phase cells, associates with translating ribosomes, possible role in mitochondrial genome maintenance; ORF contains two distinct variable minisatellites
YPR033C	505.413	0.0663419	0.265932	0.98531	505.413	0.0139833	0.37767	0.995869	505.413	0.0523587	0.461903	0.999985	HTS1	Cytoplasmic and mitochondrial histidine tRNA synthetase; encoded by a single nuclear gene that specifies two messages; efficient mitochondrial localization requires both a presequence and an amino-terminal sequence
YBR237W	41.8313	0.105448	0.449527	0.986882	41.8313	-0.368538	0.570863	0.995869	41.8313	0.473986	0.726602	0.999985	PRP5	RNA helicase in the DEAD-box family, necessary for prespliceosome formation, bridges U1 and U2 snRNPs and enables stable U2 snRNP association with intron RNA
YDR312W	76.2473	-0.863281	0.366432	0.242004	76.2473	-0.737422	0.509943	0.995869	76.2473	-0.125859	0.627889	0.999985	SSF2	Protein required for ribosomal large subunit maturation, functionally redundant with Ssf1p; member of the Brix family
YMR238W	149.927	0.475999	0.319061	0.633349	149.927	-0.46421	0.464204	0.995869	149.927	0.940208	0.563282	0.999985	DFG5	Putative mannosidase, essential glycosylphosphatidylinositol (GPI)-anchored membrane protein required for cell wall biogenesis in bud formation, involved in filamentous growth, homologous to Dcw1p
YER032W	53.4148	-0.631777	0.420833	0.629533	53.4148	-1.46447	0.542188	0.536745	53.4148	0.832698	0.686239	0.999985	FIR1	Protein involved in 3' mRNA processing, interacts with Ref2p; potential Cdc28p substrate
YCR034W	187.825	-0.042439	0.315125	0.994327	187.825	0.22699	0.445279	0.995869	187.825	-0.269429	0.545508	0.999985	FEN1	Fatty acid elongase, involved in sphingolipid biosynthesis; acts on fatty acids of up to 24 carbons in length; mutations have regulatory effects on 1,3-beta-glucan synthase, vacuolar ATPase, and the secretory pathway
YDR110W	29.0177	-0.712042	0.491744	0.646744	29.0177	-0.408857	0.595584	0.995869	29.0177	-0.303184	0.77229	0.999985	FOB1	Nucleolar protein that binds the rDNA replication fork barrier (RFB) site; required for replication fork blocking, recombinational hotspot activity, condensin recruitment to RFB and rDNA repeat segregation; related to retroviral integrases
YDR356W	65.6383	-0.230473	0.402871	0.940196	65.6383	0.746729	0.528747	0.995869	65.6383	-0.977202	0.664764	0.999985	SPC110	Inner plaque spindle pole body (SPB) component, ortholog of human kendrin; involved in connecting nuclear microtubules to SPB; interacts with Tub4p-complex and calmodulin; phosphorylated by Mps1p in cell cycle-dependent manner
YPL093W	551.505	-0.757586	0.335092	0.281122	551.505	-1.00526	0.45217	0.979651	551.505	0.24767	0.562798	0.999985	NOG1	Putative GTPase that associates with free 60S ribosomal subunits in the nucleolus and is required for 60S ribosomal subunit biogenesis; constituent of 66S pre-ribosomal particles; member of the ODN family of nucleolar G-proteins
YGR113W	38.1416	-0.367613	0.44289	0.887234	38.1416	0.00533762	0.571314	0.995869	38.1416	-0.372951	0.722877	0.999985	DAM1	Essential subunit of the Dam1 complex (aka DASH complex), couples kinetochores to the force produced by MT depolymerization thereby aiding in chromosome segregation; Ipl1p target for regulating kinetochore-MT attachments
YNL176C	43.9551	-0.262435	0.471595	0.940723	43.9551	-1.02564	0.58272	0.995869	43.9551	0.763208	0.749604	0.999985		Cell cycle-regulated gene of unknown function, promoter bound by Fkh2p
YNL099C	53.5011	-0.122834	0.397833	0.984538	53.5011	-0.439385	0.527368	0.995869	53.5011	0.316552	0.660583	0.999985	OCA1	Putative protein tyrosine phosphatase, required for cell cycle arrest in response to oxidative damage of DNA
YMR119W	36.5103	0.208317	0.473716	0.965626	36.5103	0.272148	0.586494	0.995869	36.5103	-0.0638313	0.753914	0.999985	ASI1	Putative integral membrane E3 ubiquitin ligase; acts with Asi2p and Asi3p to ensure the fidelity of SPS-sensor signalling by maintaining the dormant repressed state of gene expression in the absence of inducing signals
YNL257C	58.0708	-0.0179464	0.415264	0.997966	58.0708	-0.245381	0.528805	0.995869	58.0708	0.227434	0.672363	0.999985	SIP3	Protein that activates transcription through interaction with DNA-bound Snf1p, C-terminal region has a putative leucine zipper motif; potential Cdc28p substrate
YDR033W	688.76	-1.38692	0.606831	0.274548	688.76	-0.587956	0.646123	0.995869	688.76	-0.798965	0.886408	0.999985	MRH1	Protein that localizes primarily to the plasma membrane, also found at the nuclear envelope; the authentic, non-tagged protein is detected in mitochondria in a phosphorylated state; has similarity to Hsp30p and Yro2p
YLR190W	114.729	-1.6364	0.355918	0.000486519	114.729	-2.14714	0.486878	0.00635672	114.729	0.51074	0.60296	0.999985	MMR1	Phosphorylated protein of the mitochondrial outer membrane, localizes only to mitochondria of the bud; interacts with Myo2p to mediate mitochondrial distribution to buds; mRNA is targeted to the bud via the transport system involving She2p
YBR071W	29.7589	-0.240289	0.513919	0.956414	29.7589	-0.20089	0.609669	0.995869	29.7589	-0.0393996	0.797362	0.999985		Putative protein of unknown function; (GFP)-fusion and epitope-tagged proteins localize to the cytoplasm; mRNA expression may be regulated by the cell cycle and/or cell wall stress
YLR061W	1240.56	-0.0890283	0.252041	0.98435	1240.56	-0.02498	0.348251	0.995869	1240.56	-0.0640483	0.429888	0.999985	RPL22A	Protein component of the large (60S) ribosomal subunit, has similarity to Rpl22Bp and to rat L22 ribosomal protein
YMR143W	958.86	0.140869	0.24911	0.940196	958.86	-0.00726985	0.351687	0.995869	958.86	0.148139	0.430976	0.999985	RPS16A	Protein component of the small (40S) ribosomal subunit; identical to Rps16Bp and has similarity to E. coli S9 and rat S16 ribosomal proteins
YBR191W	1324.88	0.00572795	0.295056	0.997966	1324.88	0.0725212	0.400212	0.995869	1324.88	-0.0667933	0.497219	0.999985	RPL21A	Protein component of the large (60S) ribosomal subunit, nearly identical to Rpl21Bp and has similarity to rat L21 ribosomal protein
YPR022C	51.9717	-0.596145	0.461528	0.709921	51.9717	-0.367258	0.565997	0.995869	51.9717	-0.228887	0.730295	0.999985		Putative protein of unknown function; green fluorescent protein (GFP)-fusion protein localizes to both the cytoplasm and the nucleus and is induced in response to the DNA-damaging agent MMS
YJL141C	81.8981	0.337696	0.407579	0.887234	81.8981	0.288287	0.516504	0.995869	81.8981	0.0494087	0.65795	0.999985	YAK1	Serine-threonine protein kinase that is part of a glucose-sensing system involved in growth control in response to glucose availability; translocates from the cytoplasm to the nucleus and phosphorylates Pop2p in response to a glucose signal
YML120C	94.462	0.675156	0.417139	0.590099	94.462	0.295003	0.535429	0.995869	94.462	0.380152	0.678739	0.999985	NDI1	NADH:ubiquinone oxidoreductase, transfers electrons from NADH to ubiquinone in the respiratory chain but does not pump protons, in contrast to the higher eukaryotic multisubunit respiratory complex I; phosphorylated; homolog of human AMID
YNL096C	950.123	-0.407268	0.398132	0.830872	950.123	-0.279073	0.51352	0.995869	950.123	-0.128195	0.649778	0.999985	RPS7B	Protein component of the small (40S) ribosomal subunit, nearly identical to Rps7Ap; interacts with Kti11p; deletion causes hypersensitivity to zymocin; has similarity to rat S7 and Xenopus S8 ribosomal proteins
YOL122C	70.3218	-0.123779	0.420556	0.984538	70.3218	-0.384132	0.545835	0.995869	70.3218	0.260353	0.689055	0.999985	SMF1	Divalent metal ion transporter with a broad specificity for di-valent and tri-valent metals; post-translationally regulated by levels of metal ions; member of the Nramp family of metal transport proteins
YNR028W	63.7546	0.264083	0.406012	0.922733	63.7546	-0.349221	0.541154	0.995869	63.7546	0.613304	0.67653	0.999985	CPR8	Peptidyl-prolyl cis-trans isomerase (cyclophilin), catalyzes the cis-trans isomerization of peptide bonds N-terminal to proline residues; similarity to Cpr4p suggests a potential role in the secretory pathway
YPL208W	60.7271	0.822873	0.40434	0.388186	60.7271	0.328491	0.539557	0.995869	60.7271	0.494381	0.674242	0.999985	RKM1	SET-domain lysine-N-methyltransferase, catalyzes the formation of dimethyllysine residues on the large ribsomal subunit protein L23a (RPL23A and RPL23B)
YMR108W	670.788	0.163363	0.285326	0.940196	670.788	0.0861491	0.393475	0.995869	670.788	0.0772142	0.486039	0.999985	ILV2	Acetolactate synthase, catalyses the first common step in isoleucine and valine biosynthesis and is the target of several classes of inhibitors, localizes to the mitochondria; expression of the gene is under general amino acid control
YER001W	152.118	-0.0486374	0.373262	0.994327	152.118	-0.0668806	0.497767	0.995869	152.118	0.0182432	0.62217	0.999985	MNN1	Alpha-1,3-mannosyltransferase, integral membrane glycoprotein of the Golgi complex, required for addition of alpha1,3-mannose linkages to N-linked and O-linked oligosaccharides, one of five S. cerevisiae proteins of the MNN1 family
YER100W	84.7655	0.0537259	0.390897	0.994327	84.7655	0.279727	0.528439	0.995869	84.7655	-0.226001	0.657306	0.999985	UBC6	Ubiquitin-conjugating enzyme involved in ER-associated protein degradation; located at the cytosolic side of the ER membrane; tail region contains a transmembrane segment at the C-terminus; substrate of the ubiquitin-proteasome pathway
YDR321W	234.061	-0.141646	0.307798	0.957091	234.061	0.122099	0.432554	0.995869	234.061	-0.263746	0.530889	0.999985	ASP1	Cytosolic L-asparaginase, involved in asparagine catabolism
YDR527W	65.5068	-0.625752	0.417706	0.629883	65.5068	-0.565927	0.537572	0.995869	65.5068	-0.0598246	0.680752	0.999985	RBA50	Protein involved in transcription; interacts with RNA polymerase II subunits Rpb2p, Rpb3, and Rpb11p; has similarity to human RPAP1
YBL084C	34.4881	-0.083411	0.489867	0.990328	34.4881	0.302646	0.594733	0.995869	34.4881	-0.386057	0.770512	0.999985	CDC27	Subunit of the Anaphase-Promoting Complex/Cyclosome (APC/C), which is a ubiquitin-protein ligase required for degradation of anaphase inhibitors, including mitotic cyclins, during the metaphase/anaphase transition
YDL028C	44.2111	-0.346511	0.474037	0.903452	44.2111	-0.976119	0.581698	0.995869	44.2111	0.629609	0.75034	0.999985	MPS1	Dual-specificity kinase required for spindle pole body (SPB) duplication and spindle checkpoint function; substrates include SPB proteins Spc42p, Spc110p, and Spc98p, mitotic exit network protein Mob1p, and checkpoint protein Mad1p
YLR383W	105.817	0.839314	0.42684	0.420183	105.817	0.261512	0.547722	0.995869	105.817	0.577802	0.694396	0.999985	SMC6	Protein involved in structural maintenance of chromosomes; essential subunit of Mms21-Smc5-Smc6 complex; required for growth, DNA repair, interchromosomal and sister chromatid recombination; homologous to S. pombe rad18
YDR044W	194.716	0.100337	0.302072	0.984538	194.716	-0.331031	0.428339	0.995869	194.716	0.431368	0.524138	0.999985	HEM13	Coproporphyrinogen III oxidase, an oxygen requiring enzyme that catalyzes the sixth step in the heme biosynthetic pathway; transcription is repressed by oxygen and heme (via Rox1p and Hap1p)
YNL022C	50.8306	-0.715937	0.418108	0.563342	50.8306	-0.936693	0.55463	0.995869	50.8306	0.220756	0.694471	0.999985		Putative cytosine 5-methyltransferase, contains seven beta-strand methyltransferase motif similar to NOP2/YNL061W; green fluorescent protein (GFP)-fusion protein localizes to the nucleus; predicted to be involved in ribosome biogenesis
YOL089C	37.9912	-0.487848	0.481995	0.83248	37.9912	-0.496633	0.586441	0.995869	37.9912	0.00878558	0.759072	0.999985	HAL9	Putative transcription factor containing a zinc finger; overexpression increases salt tolerance through increased expression of the ENA1 (Na+/Li+ extrusion pump) gene while gene disruption decreases both salt tolerance and ENA1 expression
YKL005C	43.9886	-0.1483	0.420699	0.98435	43.9886	-0.390466	0.547901	0.995869	43.9886	0.242166	0.690769	0.999985	BYE1	Negative regulator of transcription elongation, contains a TFIIS-like domain and a PHD finger, multicopy suppressor of temperature-sensitive ess1 mutations, probably binds RNA polymerase II large subunit
YKL104C	679.664	0.203914	0.274449	0.903452	679.664	-0.155289	0.382419	0.995869	679.664	0.359202	0.470709	0.999985	GFA1	Glutamine-fructose-6-phosphate amidotransferase, catalyzes the formation of glucosamine-6-P and glutamate from fructose-6-P and glutamine in the first step of chitin biosynthesis
YDR145W	93.4387	-0.298568	0.366166	0.88906	93.4387	0.103823	0.488336	0.995869	93.4387	-0.402392	0.61037	0.999985	TAF12	Subunit (61/68 kDa) of TFIID and SAGA complexes, involved in RNA polymerase II transcription initiation and in chromatin modification, similar to histone H2A
YCR061W	170.538	0.70512	0.372452	0.459059	170.538	0.748595	0.500296	0.995869	170.538	-0.0434752	0.62371	0.999985		Protein of unknown function; green fluorescent protein (GFP)-fusion protein localizes to the cytoplasm in a punctate pattern; induced by treatment with 8-methoxypsoralen and UVA irradiation
YHR048W	140.576	1.09933	0.640735	0.563342	140.576	1.12234	0.578179	0.995869	140.576	-0.0230081	0.863037	0.999985	YHK8	Presumed antiporter of the DHA1 family of multidrug resistance transporters; contains 12 predicted transmembrane spans; expression of gene is up-regulated in cells exhibiting reduced susceptibility to azoles
YPR088C	217.784	0.143734	0.290905	0.952862	217.784	-0.00712939	0.415777	0.995869	217.784	0.150864	0.507441	0.999985	SRP54	Signal recognition particle (SRP) subunit (homolog of mammalian SRP54); contains the signal sequence-binding activity of SRP, interacts with the SRP RNA, and mediates binding of SRP to signal receptor; contains GTPase domain
YIL043C	448.215	0.482564	0.272347	0.537175	448.215	0.122833	0.390053	0.995869	448.215	0.359731	0.475725	0.999985	CBR1	Microsomal cytochrome b reductase, not essential for viability; also detected in mitochondria; mutation in conserved NADH binding domain of the human ortholog results in type I methemoglobinemia
YGL009C	564.281	0.057784	0.306799	0.98971	564.281	0.18933	0.418402	0.995869	564.281	-0.131546	0.518832	0.999985	LEU1	Isopropylmalate isomerase, catalyzes the second step in the leucine biosynthesis pathway
YJL127C	29.853	0.0376196	0.471787	0.996333	29.853	-0.127574	0.58458	0.995869	29.853	0.165194	0.751206	0.999985	SPT10	Putative histone acetylase with a role in transcriptional silencing, sequence-specific activator of histone genes, binds specifically and cooperatively to pairs of UAS elements in core histone promoters, functions at or near the TATA box
YHR012W	59.7418	0.0799638	0.400753	0.98971	59.7418	-0.3606	0.541251	0.995869	59.7418	0.440564	0.673461	0.999985	VPS29	Endosomal protein that is a subunit of the membrane-associated retromer complex essential for endosome-to-Golgi retrograde transport; forms a subcomplex with Vps35p and Vps26p that selects cargo proteins for endosome-to-Golgi retrieval
YNL264C	61.4329	0.295454	0.407364	0.903452	61.4329	-0.311824	0.545806	0.995869	61.4329	0.607277	0.681065	0.999985	PDR17	Phosphatidylinositol transfer protein (PITP), downregulates Plb1p-mediated turnover of phosphatidylcholine, found in the cytosol and microsomes, homologous to Pdr16p, deletion affects phospholipid composition
YLR109W	3120.19	0.949196	0.317579	0.0736382	3120.19	1.22679	0.423938	0.365745	3120.19	-0.277594	0.529698	0.999985	AHP1	Thiol-specific peroxiredoxin, reduces hydroperoxides to protect against oxidative damage; function in vivo requires covalent conjugation to Urm1p
YDR347W	38.1955	0.16999	0.432155	0.979652	38.1955	0.336251	0.55994	0.995869	38.1955	-0.16626	0.707317	0.999985	MRP1	Mitochondrial ribosomal protein of the small subunit; MRP1 exhibits genetic interactions with PET122, encoding a COX3-specific translational activator, and with PET123, encoding a small subunit mitochondrial ribosomal protein
YNL167C	34.4482	-0.0428032	0.494467	0.995495	34.4482	-0.275869	0.593921	0.995869	34.4482	0.233066	0.772805	0.999985	SKO1	Basic leucine zipper (bZIP) transcription factor of the ATF/CREB family, forms a complex with Tup1p and Ssn6p to both activate and repress transcription; cytosolic and nuclear protein involved in osmotic and oxidative stress responses
YER166W	228.037	0.179653	0.295661	0.933902	228.037	0.0572373	0.406213	0.995869	228.037	0.122416	0.502418	0.999985	DNF1	Aminophospholipid translocase (flippase) that localizes primarily to the plasma membrane; contributes to endocytosis, protein transport and cell polarity; type 4 P-type ATPase
YJR094W-A	434.205	-0.152039	0.31587	0.952862	434.205	-0.0155575	0.424092	0.995869	434.205	-0.136482	0.528798	0.999985	RPL43B	Protein component of the large (60S) ribosomal subunit, identical to Rpl43Ap and has similarity to rat L37a ribosomal protein
YHR084W	50.7056	-0.211034	0.435584	0.952862	50.7056	-0.45704	0.55002	0.995869	50.7056	0.246006	0.701593	0.999985	STE12	Transcription factor that is activated by a MAP kinase signaling cascade, activates genes involved in mating or pseudohyphal/invasive growth pathways; cooperates with Tec1p transcription factor to regulate genes specific for invasive growth
YFR002W	143.856	-0.405647	0.318092	0.71659	143.856	-0.756477	0.434782	0.995869	143.856	0.35083	0.53871	0.999985	NIC96	Component of the nuclear pore complex, required for nuclear pore formation; forms a subcomplex with Nsp1p, Nup57p, and Nup49p
YCL049C	103.343	0.905004	0.369686	0.216138	103.343	0.499552	0.511147	0.995869	103.343	0.405452	0.630815	0.999985		Protein of unknown function; localizes to membrane fraction; YCL049C is not an essential gene
YDR189W	123.7	0.00389626	0.341641	0.997966	123.7	0.0252454	0.474539	0.995869	123.7	-0.0213492	0.584727	0.999985	SLY1	Hydrophilic protein involved in vesicle trafficking between the ER and Golgi; SM (Sec1/Munc-18) family protein that binds the tSNARE Sed5p and stimulates its assembly into a trans-SNARE membrane-protein complex
YPL028W	745.519	0.279914	0.267	0.824259	745.519	0.36218	0.372268	0.995869	745.519	-0.0822658	0.458119	0.999985	ERG10	Acetyl-CoA C-acetyltransferase (acetoacetyl-CoA thiolase), cytosolic enzyme that transfers an acetyl group from one acetyl-CoA molecule to another, forming acetoacetyl-CoA; involved in the first step in mevalonate biosynthesis
YHL039W	92.6043	-0.185366	0.418273	0.964497	92.6043	-0.233585	0.541067	0.995869	92.6043	0.0482191	0.683886	0.999985	EFM1	Probable lysine methyltransferase involved in the monomethylation of eEF1A (Tef1p/Tef2p); SET-domain family member; predicted involvement in ribosome biogenesis; green fluorescent protein (GFP)-fusion protein localizes to the cytoplasm
YER094C	276.646	0.630657	0.305696	0.372262	276.646	0.485927	0.433211	0.995869	276.646	0.14473	0.530209	0.999985	PUP3	Beta 3 subunit of the 20S proteasome involved in ubiquitin-dependent catabolism; human homolog is subunit C10
YDR524C-B	1226.61	0.236354	0.288154	0.888607	1226.61	0.261968	0.394738	0.995869	1226.61	-0.0256139	0.488724	0.999985		Putative protein of unknown function
YGL115W	110.968	0.325479	0.338458	0.843811	110.968	-0.269664	0.461357	0.995869	110.968	0.595144	0.572192	0.999985	SNF4	Activating gamma subunit of the AMP-activated Snf1p kinase complex (contains Snf1p and a Sip1p/Sip2p/Gal83p family member); activates glucose-repressed genes, represses glucose-induced genes; role in sporulation, and peroxisome biogenesis
YKL191W	119.778	-0.573575	0.350993	0.588014	119.778	-0.274068	0.476999	0.995869	119.778	-0.299507	0.592214	0.999985	DPH2	Protein required, along with Dph1p, Kti11p, Jjj3p, and Dph5p, for synthesis of diphthamide, which is a modified histidine residue of translation elongation factor 2 (Eft1p or Eft2p); may act in a complex with Dph1p and Kti11p
YLR051C	68.567	-0.0335384	0.458584	0.996333	68.567	-0.977464	0.595444	0.995869	68.567	0.943926	0.75154	0.999985	FCF2	Essential nucleolar protein involved in the early steps of 35S rRNA processing; interacts with Faf1p; member of a transcriptionally co-regulated set of genes called the RRB regulon
YOR171C	97.9414	-0.148861	0.351855	0.972424	97.9414	-0.304818	0.480071	0.995869	97.9414	0.155956	0.595201	0.999985	LCB4	Sphingoid long-chain base kinase, responsible for synthesis of long-chain base phosphates, which function as signaling molecules, regulates synthesis of ceramide from exogenous long-chain bases, localizes to the Golgi and late endosomes
YCR092C	42.3519	-0.0196711	0.436223	0.997966	42.3519	-0.432147	0.559324	0.995869	42.3519	0.412476	0.709305	0.999985	MSH3	Mismatch repair protein, forms dimers with Msh2p that mediate repair of insertion or deletion mutations and removal of nonhomologous DNA ends, contains a PCNA (Pol30p) binding motif required for genome stability
YGR258C	55.5734	0.236255	0.413952	0.940196	55.5734	-0.0736	0.532314	0.995869	55.5734	0.309855	0.674325	0.999985	RAD2	Single-stranded DNA endonuclease, cleaves single-stranded DNA during nucleotide excision repair to excise damaged DNA; subunit of Nucleotide Excision Repair Factor 3 (NEF3); homolog of human XPG protein
YFL037W	1348.96	0.402607	0.261387	0.625752	1348.96	0.237342	0.360879	0.995869	1348.96	0.165265	0.445597	0.999985	TUB2	Beta-tubulin; associates with alpha-tubulin (Tub1p and Tub3p) to form tubulin dimer, which polymerizes to form microtubules
YDL237W	103.523	0.234902	0.353904	0.918407	103.523	0.0257489	0.487601	0.995869	103.523	0.209153	0.602497	0.999985	AIM6	Putative protein of unknown function, required for respiratory growth; YDL237W is not an essential gene
YHR132C	211.484	-0.00375634	0.316523	0.997966	211.484	-0.115548	0.440552	0.995869	211.484	0.111791	0.542469	0.999985	ECM14	Putative metalloprotease with similarity to the zinc carboxypeptidase family, required for normal cell wall assembly
YKL006W	4100	0.382889	0.248694	0.625752	4100	-0.220971	0.341742	0.995869	4100	0.60386	0.422654	0.999985	RPL14A	N-terminally acetylated protein component of the large (60S) ribosomal subunit, nearly identical to Rpl14Bp and has similarity to rat L14 ribosomal protein; rpl14a csh5 double null mutant exhibits synthetic slow growth
YLR136C	46.279	-0.166519	0.482593	0.984538	46.279	0.56109	0.599468	0.995869	46.279	-0.727609	0.769605	0.999985	TIS11	mRNA-binding protein expressed during iron starvation; binds to a sequence element in the 3'-untranslated regions of specific mRNAs to mediate their degradation; involved in iron homeostasis
YGL036W	67.6198	0.216719	0.384023	0.940196	67.6198	0.197583	0.502261	0.995869	67.6198	0.0191356	0.632251	0.999985		Putative protein of unknown function; green fluorescent protein (GFP)-fusion protein localizes to the cytoplasm; YGL036W is not an essential gene
YGL234W	1115.74	0.240541	0.27531	0.876617	1115.74	0.0228359	0.378877	0.995869	1115.74	0.217705	0.468341	0.999985	ADE5,7	Bifunctional enzyme of the 'de novo' purine nucleotide biosynthetic pathway, contains aminoimidazole ribotide synthetase and glycinamide ribotide synthetase activities
YGL151W	87.8733	-0.473815	0.351193	0.676098	87.8733	-0.44989	0.469089	0.995869	87.8733	-0.0239243	0.585976	0.999985	NUT1	Component of the RNA polymerase II mediator complex, which is required for transcriptional activation and also has a role in basal transcription
YOR052C	79.4207	0.580931	0.387359	0.629533	79.4207	0.726439	0.527316	0.995869	79.4207	-0.145507	0.654294	0.999985		Nuclear protein of unknown function; expression induced by nitrogen limitation in a GLN3, GAT1-independent manner and by weak acid
YBR093C	97.1016	-2.22518	0.385325	2.36913e-06	97.1016	-0.509912	0.523669	0.995869	97.1016	-1.71526	0.65011	0.999985	PHO5	Repressible acid phosphatase (1 of 3) that also mediates extracellular nucleotide-derived phosphate hydrolysis; secretory pathway derived cell surface glycoprotein; induced by phosphate starvation and coordinately regulated by PHO4 and PHO2
YLR370C	124.036	0.223196	0.396476	0.940196	124.036	0.245709	0.532996	0.995869	124.036	-0.0225129	0.664288	0.999985	ARC18	Subunit of the ARP2/3 complex, which is required for the motility and integrity of cortical actin patches
YLR172C	350.442	-0.102329	0.323622	0.984538	350.442	-0.00717715	0.449446	0.995869	350.442	-0.0951514	0.553835	0.999985	DPH5	Methyltransferase required for synthesis of diphthamide, which is a modified histidine residue of translation elongation factor 2 (Eft1p or Eft2p); not essential for viability; GFP-Dph5p fusion protein localizes to the cytoplasm
YDL116W	85.7832	-0.0804933	0.350593	0.987679	85.7832	-0.309403	0.470526	0.995869	85.7832	0.22891	0.586776	0.999985	NUP84	Subunit of the nuclear pore complex (NPC), forms a subcomplex with Nup85p, Nup120p, Nup145p-C, Sec13p, and Seh1p that plays a role in nuclear mRNA export and NPC biogenesis
YMR216C	135.269	0.034546	0.350057	0.995084	135.269	-0.226404	0.46678	0.995869	135.269	0.26095	0.583457	0.999985	SKY1	SR protein kinase (SRPK) involved in regulating proteins involved in mRNA metabolism and cation homeostasis; similar to human SRPK1
YPL283C	39.9734	-0.43179	0.494513	0.876617	39.9734	0.077116	0.572328	0.995869	39.9734	-0.508906	0.756381	0.999985	YRF1-7	Helicase encoded by the Y' element of subtelomeric regions, highly expressed in the mutants lacking the telomerase component TLC1; potentially phosphorylated by Cdc28p
YJL019W	52.1109	0.636949	0.438783	0.646744	52.1109	0.247743	0.561773	0.995869	52.1109	0.389206	0.71282	0.999985	MPS3	Nuclear envelope protein required for SPB duplication and nuclear fusion; localizes to the SPB half bridge and at telomeres during meiosis; required with Ndj1p and Csm4p for meiotic bouquet formation and telomere-led rapid prophase movement
YDR194C	124.692	-0.479569	0.342934	0.665022	124.692	-0.0561684	0.458699	0.995869	124.692	-0.4234	0.572719	0.999985	MSS116	DEAD-box protein required for efficient splicing of mitochondrial Group I and II introns; non-polar RNA helicase that also facilities strand annealing
YLR433C	120.383	0.291944	0.400619	0.903452	120.383	-0.514327	0.531712	0.995869	120.383	0.806271	0.665742	0.999985	CNA1	Calcineurin A; one isoform (the other is CMP2) of the catalytic subunit of calcineurin, a Ca++/calmodulin-regulated protein phosphatase which regulates Crz1p (a stress-response transcription factor), the other calcineurin subunit is CNB1
YGL216W	86.0818	-0.333189	0.379621	0.876617	86.0818	-0.506217	0.499007	0.995869	86.0818	0.173028	0.626981	0.999985	KIP3	Kinesin-related motor protein involved in mitotic spindle positioning
YML096W	35.1166	-0.357145	0.496912	0.903452	35.1166	-0.369549	0.60913	0.995869	35.1166	0.0124042	0.786083	0.999985		Putative protein of unknown function with similarity to asparagine synthetases; green fluorescent protein (GFP)-fusion protein localizes to the cytoplasm; YML096W is not an essential gene and partially overlaps the verified gene RAD10
YBL099W	1301.08	0.372814	0.330098	0.802954	1301.08	0.230314	0.439672	0.995869	1301.08	0.1425	0.549796	0.999985	ATP1	Alpha subunit of the F1 sector of mitochondrial F1F0 ATP synthase, which is a large, evolutionarily conserved enzyme complex required for ATP synthesis; phosphorylated
YCL054W	274.864	-0.536628	0.302839	0.537175	274.864	-0.843121	0.427959	0.995869	274.864	0.306493	0.524263	0.999985	SPB1	AdoMet-dependent methyltransferase involved in rRNA processing and 60S ribosomal subunit maturation; methylates G2922 in the tRNA docking site of the large subunit rRNA and in the absence of snR52, U2921; suppressor of PAB1 mutants
YAL012W	1485.5	0.216111	0.245888	0.876617	1485.5	0.267165	0.342226	0.995869	1485.5	-0.051054	0.421401	0.999985	CYS3	Cystathionine gamma-lyase, catalyzes one of the two reactions involved in the transsulfuration pathway that yields cysteine from homocysteine with the intermediary formation of cystathionine
YLR114C	189.001	0.0402824	0.364843	0.994831	189.001	-0.31961	0.484884	0.995869	189.001	0.359892	0.606813	0.999985	AVL9	Conserved protein involved in exocytic transport from the Golgi; mutation is synthetically lethal with apl2 vps1 double mutation; member of a protein superfamily with orthologs in diverse organisms
YOL058W	346.468	1.19817	0.365016	0.0372061	346.468	1.39186	0.489363	0.37237	346.468	-0.193682	0.610499	0.999985	ARG1	Arginosuccinate synthetase, catalyzes the formation of L-argininosuccinate from citrulline and L-aspartate in the arginine biosynthesis pathway; potential Cdc28p substrate
YGL014W	131.335	-0.622448	0.345818	0.524953	131.335	-0.708244	0.461233	0.995869	131.335	0.0857954	0.576464	0.999985	PUF4	Member of the PUF protein family, which is defined by the presence of Pumilio homology domains that confer RNA binding activity; preferentially binds mRNAs encoding nucleolar ribosomal RNA-processing factors
YOR070C	36.4914	-0.0697602	0.476123	0.992768	36.4914	-0.0447189	0.583021	0.995869	36.4914	-0.0250413	0.752732	0.999985	GYP1	Cis-golgi GTPase-activating protein (GAP) for the Rab family members Ypt1p (in vivo) and for Ypt1p, Sec4p, Ypt7p, and Ypt51p (in vitro); involved in vesicle docking and fusion
YEL052W	74.5927	0.144325	0.40113	0.982785	74.5927	-0.244263	0.527094	0.995869	74.5927	0.388588	0.662369	0.999985	AFG1	Conserved protein that may act as a chaperone in the degradation of misfolded or unassembled cytochrome c oxidase subunits; localized to matrix face of the mitochondrial inner membrane; member of the AAA family but lacks a protease domain
YAL056W	61.6948	-0.21205	0.44052	0.952862	61.6948	0.0895194	0.54981	0.995869	61.6948	-0.301569	0.704522	0.999985	GPB2	Multistep regulator of cAMP-PKA signaling; inhibits PKA downstream of Gpa2p and Cyr1p, thereby increasing cAMP dependency; inhibits Ras activity through direct interactions with Ira1p/2p; regulated by G-alpha protein Gpa2p; homolog of Gpb1p
YER159C	50.0354	-0.103472	0.410419	0.985004	50.0354	0.216164	0.553228	0.995869	50.0354	-0.319636	0.688851	0.999985	BUR6	Subunit of a heterodimeric NC2 transcription regulator complex with Ncb2p; complex binds to TBP and can repress transcription by preventing preinitiation complex assembly or stimulate activated transcription; homologous to human NC2alpha
YGR078C	116.957	-0.411668	0.333129	0.739819	116.957	-0.280908	0.47306	0.995869	116.957	-0.13076	0.578579	0.999985	PAC10	Part of the heteromeric co-chaperone GimC/prefoldin complex, which promotes efficient protein folding
YJR031C	116.197	-0.141779	0.38589	0.981531	116.197	-0.67451	0.508244	0.995869	116.197	0.532731	0.638135	0.999985	GEA1	Guanine nucleotide exchange factor for ADP ribosylation factors (ARFs), involved in vesicular transport between the Golgi and ER, Golgi organization, and actin cytoskeleton organization; similar to but not functionally redundant with Gea2p
YNR035C	228.322	0.224168	0.291612	0.898803	228.322	-0.0648852	0.410007	0.995869	228.322	0.289053	0.503133	0.999985	ARC35	Subunit of the ARP2/3 complex, which is required for the motility and integrity of cortical actin patches; required for cortical localization of calmodulin
YMR036C	28.7996	-0.936154	0.495874	0.461965	28.7996	-0.374413	0.603312	0.995869	28.7996	-0.561741	0.780879	0.999985	MIH1	Protein tyrosine phosphatase involved in cell cycle control; regulates the phosphorylation state of Cdc28p; homolog of S. pombe cdc25
YPL053C	89.3262	0.0575649	0.361873	0.990857	89.3262	0.351609	0.505289	0.995869	89.3262	-0.294044	0.621509	0.999985	KTR6	Probable mannosylphosphate transferase involved in the synthesis of core oligosaccharides in protein glycosylation pathway; member of the KRE2/MNT1 mannosyltransferase family
YML069W	222.903	0.596001	0.295691	0.396991	222.903	0.472075	0.415627	0.995869	222.903	0.123926	0.510076	0.999985	POB3	Subunit of the heterodimeric FACT complex (Spt16p-Pob3p), which associates with chromatin via interaction with Nhp6Ap and Nhp6Bp, and reorganizes nucleosomes to facilitate access to DNA by RNA and DNA polymerases
YOR340C	154.15	-0.5141	0.35279	0.646744	154.15	-0.427554	0.483189	0.995869	154.15	-0.086546	0.598268	0.999985	RPA43	RNA polymerase I subunit A43
YDL143W	427.8	0.0826086	0.273699	0.984538	427.8	0.256445	0.384726	0.995869	427.8	-0.173836	0.47215	0.999985	CCT4	Subunit of the cytosolic chaperonin Cct ring complex, related to Tcp1p, required for the assembly of actin and tubulins in vivo
YAR009C	119.869	0.260923	0.44558	0.939941	119.869	-0.0993053	0.54743	0.995869	119.869	0.360229	0.705848	0.999985		Retrotransposon TYA Gag and TYB Pol genes; in YARCTY1-1 TYB is mutant and probably non-functional
YGL063W	25.8013	1.11018	0.553424	0.400314	25.8013	-0.328082	0.628658	0.995869	25.8013	1.43826	0.837583	0.999985	PUS2	Mitochondrial tRNA:pseudouridine synthase; acts at positions 27 and 28, but not at position 72; efficiently and rapidly targeted to mitochondria, specifically dedicated to mitochondrial tRNA modification
YFL004W	243.461	-0.00407597	0.301329	0.997966	243.461	-0.102081	0.419955	0.995869	243.461	0.0980049	0.516876	0.999985	VTC2	Subunit of the vacuolar transporter chaperone (VTC) complex involved in membrane trafficking, vacuolar polyphosphate accumulation, microautophagy and non-autophagic vacuolar fusion
YDL204W	108.216	1.3229	0.624114	0.335477	108.216	0.686889	0.643373	0.995869	108.216	0.636006	0.896349	0.999985	RTN2	Protein of unknown function; has similarity to mammalian reticulon proteins; member of the RTNLA (reticulon-like A) subfamily
YLR325C	1190.26	-0.234734	0.302161	0.893973	1190.26	0.0272512	0.413938	0.995869	1190.26	-0.261985	0.51249	0.999985	RPL38	Protein component of the large (60S) ribosomal subunit, has similarity to rat L38 ribosomal protein
YMR243C	227.516	-0.5096	0.300069	0.566002	227.516	-0.194854	0.411029	0.995869	227.516	-0.314747	0.508906	0.999985	ZRC1	Vacuolar membrane zinc transporter, transports zinc from the cytosol into the vacuole for storage; also has a role in resistance to zinc shock resulting from a sudden influx of zinc into the cytoplasm
YPL240C	2866.49	0.376197	0.57024	0.918407	2866.49	0.159878	0.637739	0.995869	2866.49	0.216319	0.855503	0.999985	HSP82	Hsp90 chaperone required for pheromone signaling and negative regulation of Hsf1p; docks with Tom70p for mitochondrial preprotein delivery; promotes telomerase DNA binding and nucleotide addition; interacts with Cns1p, Cpr6p, Cpr7p, Sti1p
YOR007C	674.18	0.425395	0.2528	0.574767	674.18	0.231687	0.36252	0.995869	674.18	0.193707	0.44196	0.999985	SGT2	Glutamine-rich cytoplasmic protein that serves as a scaffold for binding Get4/5p and other proteins required to mediate posttranslational insertion of tail-anchored proteins into the ER membrane; has similarity to human cochaperone SGT
YIL128W	80.4386	-0.520164	0.361956	0.651021	80.4386	-0.547947	0.487986	0.995869	80.4386	0.0277831	0.607551	0.999985	MET18	DNA repair and TFIIH regulator, required for both nucleotide excision repair (NER) and RNA polymerase II (RNAP II) transcription; involved in telomere maintenance
YGL126W	90.7772	1.00639	0.365444	0.126643	90.7772	0.366927	0.491405	0.995869	90.7772	0.639461	0.612387	0.999985	SCS3	Protein required for inositol prototrophy, identified as an ortholog of the FIT family of proteins involved in triglyceride droplet biosynthesis; disputed role in the synthesis of inositol phospholipids from inositol
YPL090C	4049.2	0.383345	0.373956	0.830872	4049.2	0.443698	0.485583	0.995869	4049.2	-0.0603525	0.61289	0.999985	RPS6A	Protein component of the small (40S) ribosomal subunit; identical to Rps6Bp and has similarity to rat S6 ribosomal protein
YGL225W	423.058	0.247849	0.310813	0.88906	423.058	0.0341911	0.426138	0.995869	423.058	0.213658	0.527445	0.999985	VRG4	Golgi GDP-mannose transporter; regulates Golgi function and glycosylation in Golgi
YLR163C	79.6334	-0.193866	0.377476	0.949667	79.6334	-0.195964	0.510143	0.995869	79.6334	0.00209797	0.634609	0.999985	MAS1	Smaller subunit of the mitochondrial processing protease (MPP), essential processing enzyme that cleaves the N-terminal targeting sequences from mitochondrially imported proteins
YBR028C	45.7658	-0.406566	0.454463	0.87285	45.7658	-0.53457	0.566165	0.995869	45.7658	0.128004	0.725975	0.999985		Putative protein kinase, possible substrate of cAMP-dependent protein kinase (PKA)
YDL240W	48.8913	-0.742416	0.444627	0.5798	48.8913	-0.485533	0.553413	0.995869	48.8913	-0.256883	0.709867	0.999985	LRG1	Putative GTPase-activating protein (GAP) involved in the Pkc1p-mediated signaling pathway that controls cell wall integrity; appears to specifically regulate 1,3-beta-glucan synthesis
YGR285C	1472.76	-0.0859256	0.315432	0.984538	1472.76	0.118444	0.424011	0.995869	1472.76	-0.20437	0.528472	0.999985	ZUO1	Ribosome-associated chaperone, functions in ribosome biogenesis and, in partnership with Ssz1p and SSb1/2, as a chaperone for nascent polypeptide chains; contains a DnaJ domain and functions as a J-protein partner for Ssb1p and Ssb2p
YNL048W	79.4002	-0.00286622	0.358864	0.997966	79.4002	0.0582092	0.499023	0.995869	79.4002	-0.0610754	0.614661	0.999985	ALG11	Alpha-1,2-mannosyltransferase, catalyzes sequential addition of the two terminal alpha 1,2-mannose residues to the Man5GlcNAc2-PP-dolichol intermediate during asparagine-linked glycosylation in the ER
YMR207C	65.6371	-0.279839	0.409707	0.913932	65.6371	-0.539417	0.522811	0.995869	65.6371	0.259578	0.664208	0.999985	HFA1	Mitochondrial acetyl-coenzyme A carboxylase, catalyzes the production of malonyl-CoA in mitochondrial fatty acid biosynthesis
YDL191W	1333.44	-0.0153207	0.31643	0.997966	1333.44	-0.0272468	0.426065	0.995869	1333.44	0.0119262	0.530716	0.999985	RPL35A	Protein component of the large (60S) ribosomal subunit, identical to Rpl35Bp and has similarity to rat L35 ribosomal protein
YPR149W	550.378	-0.25007	0.401747	0.930292	550.378	0.247461	0.516268	0.995869	550.378	-0.497531	0.654166	0.999985	NCE102	Protein of unknown function; contains transmembrane domains; involved in secretion of proteins that lack classical secretory signal sequences; component of the detergent-insoluble glycolipid-enriched complexes (DIGs)
YNL268W	235.221	-0.342055	0.317956	0.82201	235.221	-0.259843	0.436575	0.995869	235.221	-0.0822126	0.540086	0.999985	LYP1	Lysine permease; one of three amino acid permeases (Alp1p, Can1p, Lyp1p) responsible for uptake of cationic amino acids
YPR048W	43.5485	-0.47669	0.432264	0.810561	43.5485	-0.107898	0.564463	0.995869	43.5485	-0.368792	0.710957	0.999985	TAH18	Conserved NAPDH-dependent diflavin reductase, component of an early step in the cytosolic Fe-S protein assembly (CIA) machinery; transfers electrons from NADPH to the Fe-S cluster of Dre2p; plays a pro-death role under oxidative stress
YDL161W	73.7452	0.356684	0.431237	0.887234	73.7452	0.122613	0.562527	0.995869	73.7452	0.23407	0.708803	0.999985	ENT1	Epsin-like protein involved in endocytosis and actin patch assembly and functionally redundant with Ent2p; binds clathrin via a clathrin-binding domain motif at C-terminus
YDL060W	164.193	-0.991022	0.343766	0.0954234	164.193	-0.599107	0.472502	0.995869	164.193	-0.391915	0.584307	0.999985	TSR1	Protein required for processing of 20S pre-rRNA in the cytoplasm, associates with pre-40S ribosomal particles
YFL062W	215.919	0.713845	0.316791	0.282298	215.919	0.429618	0.439465	0.995869	215.919	0.284227	0.541743	0.999985	COS4	Protein of unknown function, member of the DUP380 subfamily of conserved, often subtelomerically-encoded proteins
YEL007W	79.8524	0.162098	0.410142	0.979652	79.8524	0.100005	0.523375	0.995869	79.8524	0.0620927	0.664935	0.999985		Putative protein with sequence similarity to S. pombe gti1+ (gluconate transport inducer 1)
YGL207W	731.208	0.743463	0.263051	0.108867	731.208	0.498575	0.36716	0.995869	731.208	0.244889	0.451666	0.999985	SPT16	Subunit of the heterodimeric FACT complex (Spt16p-Pob3p), which associates with chromatin via interaction with Nhp6Ap and Nhp6Bp, and reorganizes nucleosomes to facilitate access to DNA by RNA and DNA polymerases
YMR162C	118.026	0.123852	0.352006	0.98435	118.026	-0.231565	0.465758	0.995869	118.026	0.355418	0.583813	0.999985	DNF3	Aminophospholipid translocase (flippase) that maintains membrane lipid asymmetry in post-Golgi secretory vesicles; localizes to the trans-Golgi network; likely involved in protein transport; type 4 P-type ATPase
YOR124C	170.411	0.246019	0.31583	0.89321	170.411	0.186152	0.430124	0.995869	170.411	0.0598676	0.533625	0.999985	UBP2	Ubiquitin-specific protease that removes ubiquitin from ubiquitinated proteins; interacts with Rsp5p and is required for MVB sorting of membrane proteins; can cleave polyubiquitin and has isopeptidase activity
YLR105C	40.8212	-0.141463	0.457044	0.984538	40.8212	-0.17444	0.567875	0.995869	40.8212	0.0329771	0.728939	0.999985	SEN2	Subunit of the tRNA splicing endonuclease, which is composed of Sen2p, Sen15p, Sen34p, and Sen54p; Sen2p contains the active site for tRNA 5' splice site cleavage and has similarity to Sen34p and to Archaeal tRNA splicing endonuclease
YOL049W	169.122	0.0685728	0.328375	0.98971	169.122	-0.193961	0.452517	0.995869	169.122	0.262534	0.559108	0.999985	GSH2	Glutathione synthetase, catalyzes the ATP-dependent synthesis of glutathione (GSH) from gamma-glutamylcysteine and glycine; induced by oxidative stress and heat shock
YMR261C	317.282	0.937052	0.303561	0.0603894	317.282	0.640673	0.41571	0.995869	317.282	0.296379	0.514745	0.999985	TPS3	Regulatory subunit of trehalose-6-phosphate synthase/phosphatase complex, which synthesizes the storage carbohydrate trehalose; expression is induced by stress conditions and repressed by the Ras-cAMP pathway
YPR185W	46.9972	0.221555	0.442505	0.952862	46.9972	0.702476	0.554705	0.995869	46.9972	-0.480921	0.709587	0.999985	ATG13	Regulatory subunit of the Atg1p signaling complex; stimulates Atg1p kinase activity; required for vesicle formation during autophagy and the cytoplasm-to-vacuole targeting (Cvt) pathway; involved in Atg9p, Atg23p, and Atg27p cycling
YHL028W	37.4324	-0.504837	0.645584	0.891346	37.4324	-0.307691	0.599094	0.995869	37.4324	-0.197146	0.880734	0.999985	WSC4	ER membrane protein involved in the translocation of soluble secretory proteins and insertion of membrane proteins into the ER membrane; may also have a role in the stress response but has only partial functional overlap with WSC1-3
YOR362C	217.77	0.344728	0.35023	0.840489	217.77	0.0459737	0.476877	0.995869	217.77	0.298755	0.59167	0.999985	PRE10	Alpha 7 subunit of the 20S proteasome
YEL043W	64.6439	-0.358871	0.408751	0.876617	64.6439	0.0251246	0.526271	0.995869	64.6439	-0.383995	0.666363	0.999985		Predicted cytoskeleton protein involved in intracellular signalling based on quantitative analysis of protein-protein interaction maps; may interact with ribosomes, based on co-purification studies; contains fibronectin type III domain fold
YBR208C	63.9281	0.72254	0.443535	0.588507	63.9281	0.554961	0.556533	0.995869	63.9281	0.16758	0.711647	0.999985	DUR1,2	Urea amidolyase, contains both urea carboxylase and allophanate hydrolase activities, degrades urea to CO2 and NH3; expression sensitive to nitrogen catabolite repression and induced by allophanate, an intermediate in allantoin degradation
YFL026W	203.386	-1.11703	0.391331	0.101632	203.386	-0.959601	0.507454	0.995869	203.386	-0.15743	0.640811	0.999985	STE2	Receptor for alpha-factor pheromone; seven transmembrane-domain GPCR that interacts with both pheromone and a heterotrimeric G protein to initiate the signaling response that leads to mating between haploid a and alpha cells
YKL009W	117.787	-0.868695	0.332887	0.168945	117.787	-0.778221	0.487772	0.995869	117.787	-0.0904739	0.590493	0.999985	MRT4	Protein involved in mRNA turnover and ribosome assembly, localizes to the nucleolus
YAL034C	24.1438	0.143955	0.619857	0.987175	24.1438	0.624859	0.53197	0.995869	24.1438	-0.480904	0.816831	0.999985	FUN19	Non-essential protein of unknown function; expression induced in response to heat stress
YHR172W	55.4921	0.147332	0.405209	0.98227	55.4921	0.56869	0.535893	0.995869	55.4921	-0.421358	0.671855	0.999985	SPC97	Component of the microtubule-nucleating Tub4p (gamma-tubulin) complex; interacts with Spc110p at the spindle pole body (SPB) inner plaque and with Spc72p at the SPB outer plaque
YLR257W	189.563	0.488194	0.337693	0.646744	189.563	-0.0356381	0.457885	0.995869	189.563	0.523832	0.568943	0.999985		Putative protein of unknown function
YJL158C	1769.79	-0.127439	0.258652	0.952862	1769.79	0.0976241	0.355385	0.995869	1769.79	-0.225063	0.439544	0.999985	CIS3	Mannose-containing glycoprotein constituent of the cell wall; member of the PIR (proteins with internal repeats) family
YMR054W	195.574	-0.0600137	0.316465	0.98971	195.574	-0.0280875	0.432446	0.995869	195.574	-0.0319263	0.535873	0.999985	STV1	Subunit a of the vacuolar-ATPase V0 domain, one of two isoforms (Stv1p and Vph1p); Stv1p is located in V-ATPase complexes of the Golgi and endosomes while Vph1p is located in V-ATPase complexes of the vacuole
YBR097W	48.3066	-0.039914	0.415627	0.995084	48.3066	0.0293121	0.534666	0.995869	48.3066	-0.0692261	0.677211	0.999985	VPS15	Myristoylated serine/threonine protein kinase involved in vacuolar protein sorting; functions as a membrane-associated complex with Vps34p; active form recruits Vps34p to the Golgi membrane; interacts with the GDP-bound form of Gpa1p
YML038C	44.9691	-0.41574	0.457067	0.864054	44.9691	0.271615	0.576847	0.995869	44.9691	-0.687355	0.73599	0.999985	YMD8	Putative nucleotide sugar transporter, has similarity to Vrg4p
YGR218W	693.725	0.285842	0.272432	0.824259	693.725	0.013983	0.376118	0.995869	693.725	0.271859	0.464418	0.999985	CRM1	Major karyopherin, involved in export of proteins, RNAs, and ribosomal subunits from the nucleus; exportin
YFL033C	74.2903	0.265911	0.403072	0.918407	74.2903	-0.574968	0.51263	0.995869	74.2903	0.840879	0.652116	0.999985	RIM15	Glucose-repressible protein kinase involved in signal transduction during cell proliferation in response to nutrients, specifically the establishment of stationary phase; identified as a regulator of IME2; substrate of Pho80p-Pho85p kinase
YER090W	347.588	0.321054	0.289185	0.808298	347.588	0.22462	0.404532	0.995869	347.588	0.0964339	0.497267	0.999985	TRP2	Anthranilate synthase, catalyzes the initial step of tryptophan biosynthesis, forms multifunctional hetero-oligomeric anthranilate synthase:indole-3-glycerol phosphate synthase enzyme complex with Trp3p
YGR092W	74.1592	-2.03209	0.475569	0.00169463	74.1592	-1.54324	0.584269	0.552054	74.1592	-0.488852	0.75324	0.999985	DBF2	Ser/Thr kinase involved in transcription and stress response; functions as part of a network of genes in exit from mitosis; localization is cell cycle regulated; activated by Cdc15p during the exit from mitosis
YNL118C	156.46	-0.327206	0.309899	0.824259	156.46	-0.112069	0.422001	0.995869	156.46	-0.215136	0.523566	0.999985	DCP2	Catalytic subunit of the Dcp1p-Dcp2p decapping enzyme complex, which removes the 5' cap structure from mRNAs prior to their degradation; member of the Nudix hydrolase family
YLR451W	73.115	-0.349218	0.443029	0.890444	73.115	-0.523474	0.561097	0.995869	73.115	0.174255	0.714897	0.999985	LEU3	Zinc-finger transcription factor that regulates genes involved in branched chain amino acid biosynthesis and ammonia assimilation; positively regulated by alpha-isopropylmalate, an intermediate in leucine biosynthesis
YOR377W	37.6726	-0.96054	0.502642	0.448573	37.6726	-0.0203392	0.600271	0.995869	37.6726	-0.940201	0.782924	0.999985	ATF1	Alcohol acetyltransferase with potential roles in lipid and sterol metabolism; responsible for the major part of volatile acetate ester production during fermentation
YBR295W	39.6123	-0.272013	0.557452	0.952862	39.6123	-0.735233	0.621957	0.995869	39.6123	0.46322	0.835171	0.999985	PCA1	Cadmium transporting P-type ATPase; may also have a role in copper and iron homeostasis; stabilized by Cd binding, which prevents ubiquitination; S288C and other lab strains contain a G970R mutation which eliminates Cd transport function
YLL039C	779.886	1.27531	0.354809	0.0161291	779.886	0.981823	0.469575	0.995869	779.886	0.293484	0.588548	0.999985	UBI4	Ubiquitin, becomes conjugated to proteins, marking them for selective degradation via the ubiquitin-26S proteasome system; essential for the cellular stress response; encoded as a polyubiquitin precursor comprised of 5 head-to-tail repeats
YOL119C	64.3005	0.531451	0.401495	0.686919	64.3005	0.623942	0.537172	0.995869	64.3005	-0.092491	0.67063	0.999985	MCH4	Protein with similarity to mammalian monocarboxylate permeases, which are involved in transport of monocarboxylic acids across the plasma membrane; mutant is not deficient in monocarboxylate transport
YKR016W	77.7929	0.0452799	0.382544	0.994689	77.7929	0.17668	0.511088	0.995869	77.7929	-0.1314	0.638398	0.999985	FCJ1	Mitochondrial inner membrane protein involved in formation and molecular structure of crista junctions; impairs oligomerization of F1F0-ATP synthase; null shows altered mitochondrial morphology and abnormal mitochondrial genome maintenance
YMR010W	53.9166	-0.0482673	0.404596	0.994689	53.9166	-0.257971	0.530159	0.995869	53.9166	0.209704	0.666901	0.999985		Putative protein of unknown function; green fluorescent protein (GFP)-fusion protein localizes to the cytoplasm; YMR010W is not an essential gene; YMR010W mRNA is transcribed with ADI1
YLR330W	373.582	0.0768134	0.281148	0.984538	373.582	-0.0498242	0.396947	0.995869	373.582	0.126638	0.486427	0.999985	CHS5	Component of the exomer complex, which also contains Csh6p, Bch1p, Bch2p, and Bud7p and is involved in export of selected proteins, such as chitin synthase Chs3p, from the Golgi to the plasma membrane
YPR091C	84.1173	-0.0329009	0.395302	0.9961	84.1173	-0.033383	0.523905	0.995869	84.1173	0.000482171	0.656308	0.999985		Putative protein of unknown function; may interact with ribosomes, based on co-purification experiments; green fluorescent protein (GFP)-fusion protein localizes to the endoplasmic reticulum; YPR091C is not an essential gene
YPR190C	112.17	-0.339306	0.351159	0.843026	112.17	-0.547791	0.493311	0.995869	112.17	0.208485	0.60552	0.999985	RPC82	RNA polymerase III subunit C82
YPL211W	60.9821	-0.713684	0.45527	0.619348	60.9821	-0.475578	0.579342	0.995869	60.9821	-0.238105	0.736798	0.999985	NIP7	Nucleolar protein required for 60S ribosome subunit biogenesis, constituent of 66S pre-ribosomal particles; physically interacts with Nop8p and the exosome subunit Rrp43p
YJR035W	38.3233	-0.135473	0.442801	0.984538	38.3233	0.0290691	0.554411	0.995869	38.3233	-0.164542	0.709538	0.999985	RAD26	Protein involved in transcription-coupled nucleotide excision repair of UV-induced DNA lesions; recruitment to DNA lesions is dependent on an elongating RNA polymerase II; homolog of human CSB protein
YKR070W	84.1095	0.423591	0.374978	0.802954	84.1095	0.793039	0.524808	0.995869	84.1095	-0.369449	0.645002	0.999985		Putative protein of unknown function; the authentic, non-tagged protein is detected in highly purified mitochondria in high-throughput studies
YHR073W	88.7352	-0.320313	0.370699	0.876617	88.7352	-0.287191	0.482207	0.995869	88.7352	-0.033122	0.608223	0.999985	OSH3	Member of an oxysterol-binding protein family with seven members in S. cerevisiae; family members have overlapping, redundant functions in sterol metabolism and collectively perform a function essential for viability
YOL018C	44.9224	-0.0130096	0.428408	0.997966	44.9224	-0.084986	0.568251	0.995869	44.9224	0.0719764	0.711645	0.999985	TLG2	Syntaxin-like t-SNARE that forms a complex with Tlg1p and Vti1p and mediates fusion of endosome-derived vesicles with the late Golgi; binds Vps45p, which prevents Tlg2p degradation and also facilitates t-SNARE complex formation
YDR025W	1502.49	-0.185821	0.252686	0.903452	1502.49	-0.0717897	0.348302	0.995869	1502.49	-0.114031	0.430307	0.999985	RPS11A	Protein component of the small (40S) ribosomal subunit; identical to Rps11Bp and has similarity to E. coli S17 and rat S11 ribosomal proteins
YBL051C	156.407	0.337543	0.346022	0.841273	156.407	0.207332	0.466778	0.995869	156.407	0.130211	0.581045	0.999985	PIN4	Protein involved in G2/M phase progression and response to DNA damage, interacts with Rad53p; contains an RNA recognition motif, a nuclear localization signal, and several SQ/TQ cluster domains; hyperphosphorylated in response to DNA damage
YLR077W	46.9767	0.328805	0.457943	0.903452	46.9767	0.0809559	0.572455	0.995869	46.9767	0.247849	0.733087	0.999985	FMP25	Mitochondrial inner membrane protein required for an early step in assembly of respiratory complex III (cytochrome bc1 complex); mRNA is targeted to mitochondria
YOR276W	207.764	0.317434	0.301103	0.824259	207.764	-0.0523073	0.437998	0.995869	207.764	0.369742	0.531512	0.999985	CAF20	Phosphoprotein of the mRNA cap-binding complex involved in translational control, repressor of cap-dependent translation initiation, competes with eIF4G for binding to eIF4E
YML092C	136.251	0.316917	0.331672	0.844841	136.251	0.457976	0.479383	0.995869	136.251	-0.141059	0.582936	0.999985	PRE8	Alpha 2 subunit of the 20S proteasome
YGL054C	79.9133	0.0774537	0.384834	0.98971	79.9133	-0.125533	0.522718	0.995869	79.9133	0.202987	0.649099	0.999985	ERV14	Protein localized to COPII-coated vesicles, involved in vesicle formation and incorporation of specific secretory cargo; required for the delivery of bud-site selection protein Axl2p to cell surface; related to Drosophila cornichon
YCL050C	349.617	0.217351	0.276994	0.890444	349.617	0.414646	0.399293	0.995869	349.617	-0.197295	0.485964	0.999985	APA1	Diadenosine 5',5''-P1,P4-tetraphosphate phosphorylase I (AP4A phosphorylase), involved in catabolism of bis(5'-nucleosidyl) tetraphosphates; has similarity to Apa2p
YOR355W	77.2644	-0.369884	0.407733	0.864873	77.2644	-0.260396	0.518451	0.995869	77.2644	-0.109488	0.659568	0.999985	GDS1	Protein of unknown function, required for growth on glycerol as a carbon source; the authentic, non-tagged protein is detected in highly purified mitochondria in high-throughput studies
YML026C	1215.59	0.0456339	0.293694	0.991029	1215.59	-0.0799155	0.399977	0.995869	1215.59	0.125549	0.496224	0.999985	RPS18B	Protein component of the small (40S) ribosomal subunit; nearly identical to Rps18Ap and has similarity to E. coli S13 and rat S18 ribosomal proteins
YMR199W	69.8023	-0.449915	0.406206	0.808474	69.8023	-0.233817	0.516207	0.995869	69.8023	-0.216098	0.656858	0.999985	CLN1	G1 cyclin involved in regulation of the cell cycle; activates Cdc28p kinase to promote the G1 to S phase transition; late G1 specific expression depends on transcription factor complexes, MBF (Swi6p-Mbp1p) and SBF (Swi6p-Swi4p)
YHR037W	129.457	-0.0165624	0.339703	0.997966	129.457	0.426633	0.481611	0.995869	129.457	-0.443195	0.589364	0.999985	PUT2	Delta-1-pyrroline-5-carboxylate dehydrogenase, nuclear-encoded mitochondrial protein involved in utilization of proline as sole nitrogen source; deficiency of the human homolog causes HPII, an autosomal recessive inborn error of metabolism
YHR114W	110.106	0.530204	0.339775	0.621562	110.106	0.360112	0.471398	0.995869	110.106	0.170091	0.581086	0.999985	BZZ1	SH3 domain protein implicated in the regulation of actin polymerization, able to recruit actin polymerization machinery through its SH3 domains, colocalizes with cortical actin patches and Las17p, interacts with type I myosins
YDL174C	83.3988	0.296306	0.357902	0.887234	83.3988	0.132631	0.494674	0.995869	83.3988	0.163675	0.610571	0.999985	DLD1	D-lactate dehydrogenase, oxidizes D-lactate to pyruvate, transcription is heme-dependent, repressed by glucose, and derepressed in ethanol or lactate; located in the mitochondrial inner membrane
YLR033W	63.2536	-0.480955	0.452857	0.822258	63.2536	-0.264906	0.574081	0.995869	63.2536	-0.216049	0.731188	0.999985	RSC58	Component of the RSC chromatin remodeling complex; RSC functions in transcriptional regulation and elongation, chromosome stability, and establishing sister chromatid cohesion; involved in telomere maintenance
YOR030W	24.7615	0.141456	0.54658	0.984538	24.7615	-0.44477	0.611737	0.995869	24.7615	0.586225	0.820332	0.999985	DFG16	Probable multiple transmembrane protein, involved in diploid invasive and pseudohyphal growth upon nitrogen starvation; required for accumulation of processed Rim101p
YOR232W	76.3192	0.0795894	0.375732	0.98971	76.3192	0.170078	0.516371	0.995869	76.3192	-0.0904885	0.638604	0.999985	MGE1	Mitochondrial matrix cochaperone, acts as a nucleotide release factor for Ssc1p in protein translocation and folding; also acts as cochaperone for Ssq1p in folding of Fe-S cluster proteins; homolog of E. coli GrpE
YOR113W	30.6463	-0.641846	0.493251	0.702127	30.6463	0.228457	0.597241	0.995869	30.6463	-0.870302	0.774615	0.999985	AZF1	Zinc-finger transcription factor, involved in induction of CLN3 transcription in response to glucose; genetic and physical interactions indicate a possible role in mitochondrial transcription or genome maintenance
YGL122C	119.198	-0.399621	0.334849	0.768577	119.198	-0.401734	0.471248	0.995869	119.198	0.00211268	0.578091	0.999985	NAB2	Nuclear polyadenylated RNA-binding protein required for nuclear mRNA export and poly(A) tail length control; binds nuclear pore protein Mlp1p; autoregulates mRNA levels; related to human hnRNPs; nuclear localization sequence binds Kap104p
YMR203W	332.346	-0.106909	0.280164	0.980434	332.346	0.216118	0.393345	0.995869	332.346	-0.323027	0.482921	0.999985	TOM40	Component of the TOM (translocase of outer membrane) complex responsible for recognition and initial import steps for all mitochondrially directed proteins; constitutes the core element of the protein conducting pore
YGR281W	226.272	-0.0643047	0.336841	0.98971	226.272	-0.271046	0.4523	0.995869	226.272	0.206741	0.563947	0.999985	YOR1	Plasma membrane ATP-binding cassette (ABC) transporter, multidrug transporter mediates export of many different organic anions including oligomycin; similar to human cystic fibrosis transmembrane receptor (CFTR)
YGL023C	77.9385	0.279394	0.390195	0.903452	77.9385	-0.294214	0.513237	0.995869	77.9385	0.573608	0.644719	0.999985	PIB2	Protein binding phosphatidylinositol 3-phosphate, involved in telomere-proximal repression of gene expression; similar to Fab1 and Vps27
YGL221C	109.579	-0.169926	0.333583	0.950944	109.579	-0.187545	0.480955	0.995869	109.579	0.0176198	0.585314	0.999985	NIF3	Protein of unknown function, similar to Listeria monocytogenes major sigma factor (rpoD gene product); the authentic, non-tagged protein is detected in highly purified mitochondria in high-throughput studies
YHR163W	117.024	0.0506089	0.334656	0.991029	117.024	-0.142297	0.477389	0.995869	117.024	0.192906	0.583004	0.999985	SOL3	6-phosphogluconolactonase, catalyzes the second step of the pentose phosphate pathway; weak multicopy suppressor of los1-1 mutation; homologous to Sol2p and Sol1p
YMR079W	333.933	0.104606	0.279631	0.981235	333.933	-0.0626376	0.397172	0.995869	333.933	0.167243	0.485735	0.999985	SEC14	Phosphatidylinositol/phosphatidylcholine transfer protein; involved in regulating PtdIns, PtdCho, and ceramide metabolism, products of which regulate intracellular transport and UPR; functionally homologous to mammalian PITPs
YAL025C	137.198	-0.903005	0.323194	0.116851	137.198	-0.304614	0.449479	0.995869	137.198	-0.598391	0.553601	0.999985	MAK16	Essential nuclear protein, constituent of 66S pre-ribosomal particles; required for maturation of 25S and 5.8S rRNAs; required for maintenance of M1 satellite double-stranded RNA of the L-A virus
YDL103C	138.092	0.589684	0.380646	0.623582	138.092	0.550999	0.516241	0.995869	138.092	0.0386852	0.6414	0.999985	QRI1	UDP-N-acetylglucosamine pyrophosphorylase, catalyzes the formation of UDP-N-acetylglucosamine (UDP-GlcNAc), which is important in cell wall biosynthesis, protein N-glycosylation, and GPI anchor biosynthesis
YLR167W	3992.6	0.242458	0.297684	0.88906	3992.6	0.162091	0.400193	0.995869	3992.6	0.0803669	0.498769	0.999985	RPS31	Fusion protein that is cleaved to yield a ribosomal protein of the small (40S) subunit and ubiquitin; ubiquitin may facilitate assembly of the ribosomal protein into ribosomes; interacts genetically with translation factor eIF2B
YLR264W	840.109	0.212971	0.296207	0.903452	840.109	-0.243387	0.416436	0.995869	840.109	0.456358	0.511036	0.999985	RPS28B	Protein component of the small (40S) ribosomal subunit; nearly identical to Rps28Ap and has similarity to rat S28 ribosomal protein
YLL050C	425.172	0.25718	0.311327	0.887234	425.172	0.369959	0.427289	0.995869	425.172	-0.112779	0.528679	0.999985	COF1	Cofilin, promotes actin filament depolarization in a pH-dependent manner; binds both actin monomers and filaments and severs filaments; thought to be regulated by phosphorylation at SER4; ubiquitous and essential in eukaryotes
YML128C	320.088	1.46377	0.584442	0.19931	320.088	1.01634	0.643018	0.995869	320.088	0.447432	0.868932	0.999985	MSC1	Protein of unknown function; mutant is defective in directing meiotic recombination events to homologous chromatids; the authentic, non-tagged protein is detected in highly purified mitochondria and is phosphorylated
YLR066W	70.739	0.323413	0.409439	0.890444	70.739	-0.093306	0.560318	0.995869	70.739	0.416719	0.693972	0.999985	SPC3	Subunit of signal peptidase complex (Spc1p, Spc2p, Spc3p, Sec11p), which catalyzes cleavage of N-terminal signal sequences of proteins targeted to the secretory pathway; homologous to mammalian SPC22/23
YJL084C	70.1827	-0.702925	0.400673	0.547978	70.1827	-0.476231	0.517896	0.995869	70.1827	-0.226694	0.654778	0.999985	ALY2	Protein proposed to regulate the endocytosis of plasma membrane proteins; interacts with the cyclin Pcl7p and ubiquitin ligase Rsp5p; phosphorylated by the cyclin-CDK complex, Pcl7p-Pho85p; mRNA is cell cycle regulated, peaking in M phase
YER081W	221.453	0.0904881	0.318982	0.984538	221.453	0.368812	0.43827	0.995869	221.453	-0.278324	0.542062	0.999985	SER3	3-phosphoglycerate dehydrogenase, catalyzes the first step in serine and glycine biosynthesis; isozyme of Ser33p
YNL008C	43.2467	0.0809556	0.436869	0.98971	43.2467	-0.0184864	0.553734	0.995869	43.2467	0.0994421	0.705319	0.999985	ASI3	Putative integral membrane E3 ubiquitin ligase; acts with Asi1p and Asi2p to ensure the fidelity of SPS-sensor signalling by maintaining the dormant repressed state of gene expression in the absence of inducing signals
YJR060W	76.6755	-0.510679	0.383295	0.681818	76.6755	-0.0502665	0.50549	0.995869	76.6755	-0.460413	0.634376	0.999985	CBF1	Helix-loop-helix protein that binds the motif CACRTG, which is present at several sites including MET gene promoters and centromere DNA element I (CDEI); required for nucleosome positioning at this motif; targets Isw1p to DNA
YBL105C	123.167	-0.0244324	0.330561	0.996333	123.167	-0.251446	0.444157	0.995869	123.167	0.227014	0.553665	0.999985	PKC1	Protein serine/threonine kinase essential for cell wall remodeling during growth; localized to sites of polarized growth and the mother-daughter bud neck; homolog of the alpha, beta, and gamma isoforms of mammalian protein kinase C (PKC)
YHR026W	271.039	0.0852317	0.314058	0.984538	271.039	0.488554	0.438314	0.995869	271.039	-0.403322	0.539215	0.999985	VMA16	Subunit c'' of the vacuolar ATPase, which functions in acidification of the vacuole; one of three proteolipid subunits of the V0 domain
YNL080C	43.7415	-0.446013	0.466403	0.844841	43.7415	-0.296225	0.580596	0.995869	43.7415	-0.149788	0.744715	0.999985	EOS1	Protein involved in N-glycosylation; deletion mutation confers sensitivity to exidative stress and shows synthetic lethality with mutations in the spindle checkpoint genes BUB3 and MAD1; YNL080C is not an essential gene
YMR100W	50.7531	-0.26503	0.420857	0.926551	50.7531	-0.220007	0.533866	0.995869	50.7531	-0.0450231	0.679795	0.999985	MUB1	MYND domain-containing protein required for ubiquitination and turnover of Rpn4p; interacts with Ubr2p (E3) and indirectly with Rad6p (E2); short-lived protein degraded in a Ubr2p/Rad6p dependent manner; similar to the A. nidulans samB gene
YER009W	362.965	0.113488	0.296747	0.98037	362.965	0.191352	0.410102	0.995869	362.965	-0.0778642	0.506204	0.999985	NTF2	Nuclear envelope protein, interacts with GDP-bound Gsp1p and with proteins of the nuclear pore to transport Gsp1p into the nucleus where it is an essential player in nucleocytoplasmic transport
YLR220W	72.9981	0.38507	0.390742	0.840489	72.9981	-0.0462152	0.522688	0.995869	72.9981	0.431285	0.652597	0.999985	CCC1	Putative vacuolar Fe2+/Mn2+ transporter; suppresses respiratory deficit of yfh1 mutants, which lack the ortholog of mammalian frataxin, by preventing mitochondrial iron accumulation
YPR181C	687.5	0.374596	0.261724	0.651021	687.5	0.114677	0.364138	0.995869	687.5	0.259918	0.448437	0.999985	SEC23	GTPase-activating protein, stimulates the GTPase activity of Sar1p; component of the Sec23p-Sec24p heterodimer of the COPII vesicle coat, involved in ER to Golgi transport
YNR046W	70.9493	-1.12645	0.382172	0.0815379	70.9493	-0.563642	0.529915	0.995869	70.9493	-0.562809	0.653296	0.999985	TRM112	Subunit of tRNA methyltransferase (MTase) complexes in combination with Trm9p and Trm11p; subunit of complex with Mtq2p that methylates Sup45p (eRF1) in the ternary complex eRF1-eRF3-GTP; deletion confers resistance to zymocin
YPL266W	100.428	-0.738852	0.363049	0.388186	100.428	-0.942496	0.506747	0.995869	100.428	0.203644	0.623339	0.999985	DIM1	Essential 18S rRNA dimethylase (dimethyladenosine transferase), responsible for conserved m6(2)Am6(2)A dimethylation in 3'-terminal loop of 18S rRNA, part of 90S and 40S pre-particles in nucleolus, involved in pre-ribosomal RNA processing
YLR303W	926.137	0.343955	0.287843	0.768288	926.137	0.585174	0.396342	0.995869	926.137	-0.24122	0.489837	0.999985	MET17	Methionine and cysteine synthase (O-acetyl homoserine-O-acetyl serine sulfhydrylase), required for sulfur amino acid synthesis
YGL001C	142.433	0.309255	0.383205	0.88906	142.433	0.425769	0.51297	0.995869	142.433	-0.116513	0.6403	0.999985	ERG26	C-3 sterol dehydrogenase, catalyzes the second of three steps required to remove two C-4 methyl groups from an intermediate in ergosterol biosynthesis
YCR069W	134.485	0.394599	0.346145	0.802954	134.485	0.422352	0.483068	0.995869	134.485	-0.0277533	0.594282	0.999985	CPR4	Peptidyl-prolyl cis-trans isomerase (cyclophilin), catalyzes the cis-trans isomerization of peptide bonds N-terminal to proline residues; has a potential role in the secretory pathway
YML073C	2231.97	0.0780916	0.254141	0.984538	2231.97	-0.0841798	0.350947	0.995869	2231.97	0.162271	0.433303	0.999985	RPL6A	N-terminally acetylated protein component of the large (60S) ribosomal subunit, has similarity to Rpl6Bp and to rat L6 ribosomal protein; binds to 5.8S rRNA
YEL047C	376.452	1.30335	0.27255	0.000280818	376.452	1.50131	0.38869	0.0361397	376.452	-0.19796	0.474719	0.999985		Soluble fumarate reductase, required with isoenzyme Osm1p for anaerobic growth; may interact with ribosomes, based on co-purification experiments; authentic, non-tagged protein is detected in purified mitochondria in high-throughput studies
YAL043C	106.952	-0.111611	0.357116	0.984538	106.952	-0.0207824	0.47712	0.995869	106.952	-0.0908285	0.595966	0.999985	PTA1	Subunit of holo-CPF, a multiprotein complex and functional homolog of mammalian CPSF, required for the cleavage and polyadenylation of mRNA and snoRNA 3' ends; involved in pre-tRNA processing; binds to the phosphorylated CTD of RNAPII
YHR206W	55.1719	-0.775171	0.434209	0.529964	55.1719	-0.788384	0.545936	0.995869	55.1719	0.0132126	0.697497	0.999985	SKN7	Nuclear response regulator and transcription factor, part of a branched two-component signaling system; required for optimal induction of heat-shock genes in response to oxidative stress; involved in osmoregulation
YDL121C	82.2878	-0.210136	0.404906	0.949503	82.2878	-0.287374	0.536695	0.995869	82.2878	0.0772381	0.672297	0.999985		Putative protein of unknown function; green fluorescent protein (GFP)-fusion protein localizes to the endoplasmic reticulum; YDL121C is not an essential protein
YDL020C	109.405	0.660953	0.376747	0.547978	109.405	-0.0912009	0.493668	0.995869	109.405	0.752154	0.621005	0.999985	RPN4	Transcription factor that stimulates expression of proteasome genes; Rpn4p levels are in turn regulated by the 26S proteasome in a negative feedback control mechanism; RPN4 is transcriptionally regulated by various stress responses
YFL022C	521.047	0.0709275	0.273215	0.984538	521.047	-0.0786965	0.382573	0.995869	521.047	0.149624	0.470115	0.999985	FRS2	Alpha subunit of cytoplasmic phenylalanyl-tRNA synthetase, forms a tetramer with Frs1p to form active enzyme; evolutionarily distant from mitochondrial phenylalanyl-tRNA synthetase based on protein sequence, but substrate binding is similar
YJR042W	128.814	0.0502012	0.337807	0.992579	128.814	-0.338674	0.458665	0.995869	128.814	0.388876	0.569636	0.999985	NUP85	Subunit of the Nup84p subcomplex of the nuclear pore complex (NPC), required for assembly of the subcomplex and also for formation of the nucleocytoplasmic Gsp1p concentration gradient that plays a role in nuclear trafficking
YOR065W	185.37	0.457839	0.460163	0.83801	185.37	0.397643	0.57325	0.995869	185.37	0.0601959	0.735095	0.999985	CYT1	Cytochrome c1, component of the mitochondrial respiratory chain; expression is regulated by the heme-activated, glucose-repressed Hap2p/3p/4p/5p CCAAT-binding complex
YNL329C	48.0825	-0.167188	0.489575	0.984538	48.0825	-0.185944	0.590798	0.995869	48.0825	0.0187562	0.76728	0.999985	PEX6	AAA-peroxin that heterodimerizes with AAA-peroxin Pex1p and participates in the recycling of peroxisomal signal receptor Pex5p from the peroxisomal membrane to the cystosol
YGL203C	171.672	-0.029454	0.298453	0.995084	171.672	-0.15683	0.422862	0.995869	171.672	0.127376	0.517576	0.999985	KEX1	Protease involved in the processing of killer toxin and alpha factor precursor; cleaves Lys and Arg residues from the C-terminus of peptides and proteins
YDR080W	44.2693	-0.0567076	0.42908	0.994327	44.2693	0.443899	0.562711	0.995869	44.2693	-0.500607	0.707653	0.999985	VPS41	Vacuolar membrane protein that is a subunit of the homotypic vacuole fusion and vacuole protein sorting (HOPS) complex; essential for membrane docking and fusion at the Golgi-to-endosome and endosome-to-vacuole stages of protein transport
YLR088W	141.149	0.233798	0.36362	0.92464	141.149	0.327117	0.505268	0.995869	141.149	-0.0933187	0.622508	0.999985	GAA1	Subunit of the GPI (glycosylphosphatidylinositol):protein transamidase complex, removes the GPI-anchoring signal and attaches GPI to proteins in the ER
YKL148C	181.053	0.730746	0.369333	0.41229	181.053	0.455099	0.491268	0.995869	181.053	0.275647	0.614614	0.999985	SDH1	Flavoprotein subunit of succinate dehydrogenase (Sdh1p, Sdh2p, Sdh3p, Sdh4p), which couples the oxidation of succinate to the transfer of electrons to ubiquinone as part of the TCA cycle and the mitochondrial respiratory chain
YJR006W	59.7256	0.791575	0.41857	0.459723	59.7256	0.0834441	0.541829	0.995869	59.7256	0.708131	0.684672	0.999985	POL31	DNA polymerase III (delta) subunit, essential for cell viability; involved in DNA replication and DNA repair
YAL007C	178.313	0.599501	0.314244	0.449479	178.313	0.475744	0.46146	0.995869	178.313	0.123758	0.558294	0.999985	ERP2	Protein that forms a heterotrimeric complex with Erp1p, Emp24p, and Erv25p; member, along with Emp24p and Erv25p, of the p24 family involved in ER to Golgi transport and localized to COPII-coated vesicles
YKR025W	83.0794	-0.436655	0.364177	0.766325	83.0794	-0.291337	0.51727	0.995869	83.0794	-0.145318	0.632597	0.999985	RPC37	RNA polymerase III subunit C37
YBR187W	174.19	-0.1923	0.304281	0.925622	174.19	0.702177	0.432787	0.995869	174.19	-0.894477	0.529053	0.999985	GDT1	Putative protein of unknown function; expression is reduced in a gcr1 null mutant; GFP-fusion protein localizes to the vacuole; expression pattern and physical interactions suggest a possible role in ribosome biogenesis
YEL038W	88.942	0.44714	0.352624	0.718049	88.942	0.458705	0.490322	0.995869	88.942	-0.0115647	0.603951	0.999985	UTR4	Protein with sequence similarity to 2,3-diketo-5-methylthiopentyl-1-phosphate enolase-phosphatases, involved in methionine salvage; found in both the cytoplasm and nucleus
YML113W	35.088	-0.371137	0.486661	0.90046	35.088	-0.203983	0.594683	0.995869	35.088	-0.167153	0.768416	0.999985	DAT1	DNA binding protein that recognizes oligo(dA).oligo(dT) tracts; Arg side chain in its N-terminal pentad Gly-Arg-Lys-Pro-Gly repeat is required for DNA-binding; not essential for viability
YPR055W	61.9472	-0.322343	0.381684	0.882566	61.9472	-0.288838	0.502255	0.995869	61.9472	-0.0335045	0.630818	0.999985	SEC8	Essential 121kDa subunit of the exocyst complex (Sec3p, Sec5p, Sec6p, Sec8p, Sec10p, Sec15p, Exo70p, and Exo84p), which has the essential function of mediating polarized targeting of secretory vesicles to active sites of exocytosis
YJL073W	50.6717	0.868667	0.455845	0.45052	50.6717	0.396481	0.576647	0.995869	50.6717	0.472186	0.73505	0.999985	JEM1	DnaJ-like chaperone required for nuclear membrane fusion during mating, localizes to the ER membrane; exhibits genetic interactions with KAR2
YGR210C	145.909	0.156714	0.328249	0.954817	145.909	-0.251752	0.451382	0.995869	145.909	0.408466	0.558115	0.999985		Putative protein of unknown function; green fluorescent protein (GFP)-fusion protein localizes to the cytoplasm
YDR257C	59.6082	-0.0552423	0.422269	0.994327	59.6082	-0.177293	0.55087	0.995869	59.6082	0.122051	0.694092	0.999985	RKM4	Ribosomal lysine methyltransferase specific for monomethylation of Rpl42ap and Rpl42bp (lysine 55); nuclear SET-domain containing protein
YOR290C	189.209	-0.463812	0.344779	0.676098	189.209	-0.264262	0.456101	0.995869	189.209	-0.19955	0.57175	0.999985	SNF2	Catalytic subunit of the SWI/SNF chromatin remodeling complex involved in transcriptional regulation; contains DNA-stimulated ATPase activity; functions interdependently in transcriptional activation with Snf5p and Snf6p
YBR017C	223.029	-0.0202598	0.291385	0.996333	223.029	-0.319153	0.406961	0.995869	223.029	0.298893	0.500521	0.999985	KAP104	Transportin or cytosolic karyopherin beta 2; functions in the rg-nuclear localization signal-mediated nuclear import/reimport of mRNA-binding proteins Nab2p and Hrp1p; regulates asymmetric protein synthesis in daughter cells during mitosis
YDL192W	621.267	0.0566454	0.255537	0.98929	621.267	-0.136602	0.358044	0.995869	621.267	0.193247	0.43988	0.999985	ARF1	ADP-ribosylation factor, GTPase of the Ras superfamily involved in regulation of coated vesicle formation in intracellular trafficking within the Golgi; functionally interchangeable with Arf2p
Q0085	117.976	0.0278538	0.64602	0.997966	117.976	0.439159	0.614656	0.995869	117.976	-0.411306	0.891708	0.999985	ATP6	Mitochondrially encoded subunit a of the F0 sector of mitochondrial F1F0 ATP synthase; translation is specifically activated by Atp22p; ATP6 and ATP8 mRNAs are not translated in the absence of the F1 sector of ATPase
YGL238W	253.255	0.0488217	0.291984	0.990857	253.255	-0.0305259	0.39982	0.995869	253.255	0.0793476	0.495087	0.999985	CSE1	Nuclear envelope protein that mediates the nuclear export of importin alpha (Srp1p), homolog of metazoan CAS protein, required for accurate chromosome segregation
YAR014C	127.114	-0.284546	0.350642	0.88906	127.114	0.0849068	0.475579	0.995869	127.114	-0.369453	0.590869	0.999985	BUD14	Protein involved in bud-site selection, Bud14p-Glc7p complex is a cortical regulator of dynein; inhibitor of the actin assembly factor Bnr1p (formin); diploid mutants display a random budding pattern instead of the wild-type bipolar pattern
YGL119W	46.5688	-0.0205191	0.420665	0.997966	46.5688	-0.619374	0.554043	0.995869	46.5688	0.598855	0.69563	0.999985	COQ8	Protein required for ubiquinone (coenzyme Q) biosynthesis and for respiratory growth; exhibits genetic interaction with COQ9, suggesting a common function; similar to prokaryotic proteins involved in early steps of ubiquinone biosynthesis
YIL153W	67.121	0.35425	0.44457	0.88906	67.121	-0.182849	0.574029	0.995869	67.121	0.537099	0.726052	0.999985	RRD1	Peptidyl-prolyl cis/trans-isomerase, activator of the phosphotyrosyl phosphatase activity of PP2A; involved in G1 phase progression, microtubule dynamics, bud morphogenesis and DNA repair; subunit of the Tap42p-Sit4p-Rrd1p complex
YER010C	44.5051	0.574114	0.419799	0.673247	44.5051	0.284794	0.551033	0.995869	44.5051	0.28932	0.692721	0.999985		Protein of unknown function, forms a ring-shaped homotrimer; has similarity to members of the prokaryotic rraA family; possibly involved in a phosphotransfer reaction
YGR175C	729.103	0.0987965	0.256772	0.979652	729.103	-0.115664	0.360667	0.995869	729.103	0.214461	0.442733	0.999985	ERG1	Squalene epoxidase, catalyzes the epoxidation of squalene to 2,3-oxidosqualene; plays an essential role in the ergosterol-biosynthesis pathway and is the specific target of the antifungal drug terbinafine
YLR293C	1282.09	-0.0747364	0.282297	0.984538	1282.09	0.0321687	0.386512	0.995869	1282.09	-0.106905	0.478626	0.999985	GSP1	Ran GTPase, GTP binding protein (mammalian Ranp homolog) involved in the maintenance of nuclear organization, RNA processing and transport; regulated by Srm1p, Rna1p, Yrb1p, Yrb2p, Yrp4p, Yrb30p, Cse1p and Kap95p; yeast Gsp2p homolog
YGL191W	135.516	0.258151	0.357461	0.903452	135.516	0.340089	0.495999	0.995869	135.516	-0.0819376	0.611386	0.999985	COX13	Subunit VIa of cytochrome c oxidase, which is the terminal member of the mitochondrial inner membrane electron transport chain; not essential for cytochrome c oxidase activity but may modulate activity in response to ATP
YBR170C	84.5788	0.257113	0.360066	0.903452	84.5788	0.0523566	0.496463	0.995869	84.5788	0.204756	0.613289	0.999985	NPL4	Endoplasmic reticulum and nuclear membrane protein, forms a complex with Cdc48p and Ufd1p that recognizes ubiquitinated proteins in the endoplasmic reticulum and delivers them to the proteasome for degradation
YDR451C	49.1374	-0.503525	0.430636	0.785937	49.1374	0.479026	0.547838	0.995869	49.1374	-0.982552	0.696858	0.999985	YHP1	One of two homeobox transcriptional repressors (see also Yox1p), that bind to Mcm1p and to early cell cycle box (ECB) elements of cell cycle regulated genes, thereby restricting ECB-mediated transcription to the M/G1 interval
YBR053C	79.5381	0.713118	0.383237	0.479	79.5381	0.313355	0.519269	0.995869	79.5381	0.399763	0.645373	0.999985		Putative protein of unknown function; induced by cell wall perturbation
YOL076W	120.49	-0.532037	0.35154	0.629533	120.49	-0.190732	0.471837	0.995869	120.49	-0.341305	0.588394	0.999985	MDM20	Non-catalytic subunit of the NatB N-terminal acetyltransferase, which catalyzes N-acetylation of proteins with specific N-terminal sequences; involved in mitochondrial inheritance and actin assembly
YDL138W	22.3967	-0.295969	0.603832	0.952862	22.3967	-0.393685	0.645692	0.995869	22.3967	0.0977166	0.884024	0.999985	RGT2	Plasma membrane high glucose sensor that regulates glucose transport; contains 12 predicted transmembrane segments and a long C-terminal tail required for induction of hexose transporters; highly similar to Snf3p
YML131W	149.236	1.41801	0.368147	0.00721278	149.236	1.21898	0.514491	0.821161	149.236	0.199031	0.632616	0.999985		Putative protein of unknown function with similarity to medium chain dehydrogenase/reductases; expression induced by stresses including osmotic shock, DNA damaging agents, and other chemicals; GFP-fusion protein localizes to the cytoplasm
YNL132W	401.09	-0.347067	0.33635	0.830872	401.09	-0.269299	0.454157	0.995869	401.09	-0.0777678	0.565145	0.999985	KRE33	Essential protein, required for biogenesis of the small ribosomal subunit; heterozygous mutant shows haploinsufficiency in K1 killer toxin resistance
YER155C	314.105	0.0135033	0.276015	0.997966	314.105	-0.144528	0.375634	0.995869	314.105	0.158031	0.466138	0.999985	BEM2	Rho GTPase activating protein (RhoGAP) involved in the control of cytoskeleton organization and cellular morphogenesis; required for bud emergence
YJL051W	46.4566	-2.23858	0.503229	0.000904719	46.4566	-2.4813	0.61059	0.01856	46.4566	0.242717	0.790789	0.999985	IRC8	Bud tip localized protein of unknown function; mRNA is targeted to the bud by a She2p dependent transport system; mRNA is cell cycle regulated via Fkh2p, peaking in G2/M phase; null mutant displays increased levels of spontaneous Rad52p foc
YGR276C	50.611	0.249806	0.428193	0.940196	50.611	0.208729	0.559806	0.995869	50.611	0.0410778	0.704793	0.999985	RNH70	3'-5' exoribonuclease; required for maturation of 3' ends of 5S rRNA and tRNA-Arg3 from dicistronic transcripts
YOL010W	69.7696	-0.64959	0.396777	0.588014	69.7696	-0.565595	0.527584	0.995869	69.7696	-0.0839948	0.660103	0.999985	RCL1	Subunit of U3-containing 90S preribosome processome complex involved in 18S rRNA biogenesis and small ribosomal subunit assembly; stimulates Bms1p GTPase and U3 binding activity; similar to RNA cyclase-like proteins but no activity detected
YHR158C	163.688	0.729557	0.304759	0.227837	163.688	0.237091	0.425447	0.995869	163.688	0.492466	0.523337	0.999985	KEL1	Protein required for proper cell fusion and cell morphology; functions in a complex with Kel2p to negatively regulate mitotic exit, interacts with Tem1p and Lte1p; localizes to regions of polarized growth; potential Cdc28p substrate
YBR035C	264.497	0.468908	0.320891	0.646744	264.497	0.844329	0.452888	0.995869	264.497	-0.375421	0.555047	0.999985	PDX3	Pyridoxine (pyridoxamine) phosphate oxidase, has homologs in E. coli and Myxococcus xanthus; transcription is under the general control of nitrogen metabolism
YNR039C	37.2719	-0.683927	0.485354	0.661389	37.2719	-0.230211	0.594089	0.995869	37.2719	-0.453716	0.767127	0.999985	ZRG17	Endoplasmic reticulum protein of unknown function, transcription is induced under conditions of zinc deficiency; mutant phenotype suggests a role in uptake of zinc
YJL217W	74.4306	0.4761	0.369175	0.711648	74.4306	-0.613981	0.517663	0.995869	74.4306	1.09008	0.635825	0.999985	REE1	Cytoplasmic protein involved in the regulation of enolase (ENO1); mRNA expression is induced by calcium shortage, copper deficiency (via Mac1p) and the presence of galactose (via Gal4p); mRNA expression is also regulated by the cell cycle
YFR031C	80.4731	0.0689953	0.375448	0.98971	80.4731	0.574308	0.495383	0.995869	80.4731	-0.505313	0.62159	0.999985	SMC2	Subunit of the condensin complex; essential SMC chromosomal ATPase family member that forms a complex with Smc4p to form the active ATPase; Smc2p/Smc4p complex binds DNA; required for clustering of tRNA genes at the nucleolus
YOR038C	52.6282	-0.125919	0.437568	0.984538	52.6282	-0.0803852	0.550829	0.995869	52.6282	-0.0455335	0.703473	0.999985	HIR2	Subunit of the HIR complex, a nucleosome assembly complex involved in regulation of histone gene transcription; recruits Swi-Snf complexes to histone gene promoters; promotes heterochromatic gene silencing with Asf1p
YJL172W	283.194	0.283824	0.326578	0.876617	283.194	0.521738	0.449303	0.995869	283.194	-0.237914	0.555451	0.999985	CPS1	Vacuolar carboxypeptidase yscS; expression is induced under low-nitrogen conditions
YER111C	69.4034	0.59447	0.408677	0.646744	69.4034	-0.0547144	0.515371	0.995869	69.4034	0.649185	0.657742	0.999985	SWI4	DNA binding component of the SBF complex (Swi4p-Swi6p), a transcriptional activator that in concert with MBF (Mbp1-Swi6p) regulates late G1-specific transcription of targets including cyclins and genes required for DNA synthesis and repair
YLR118C	69.5648	0.32011	0.399986	0.88906	69.5648	0.703024	0.543599	0.995869	69.5648	-0.382914	0.674899	0.999985		Acyl-protein thioesterase responsible for depalmitoylation of Gpa1p; green fluorescent protein (GFP)-fusion protein localizes to both the cytoplasm and nucleus and is induced in response to the DNA-damaging agent MMS
YML012W	525.419	0.50776	0.2677	0.457385	525.419	0.529972	0.38488	0.995869	525.419	-0.0222116	0.468824	0.999985	ERV25	Protein that forms a heterotrimeric complex with Erp1, Erp2p, and Emp24, member of the p24 family involved in endoplasmic reticulum to Golgi transport
YKL216W	674.705	-0.0926989	0.63148	0.992768	674.705	-0.220624	0.640382	0.995869	674.705	0.127925	0.899364	0.999985	URA1	Dihydroorotate dehydrogenase, catalyzes the fourth enzymatic step in the de novo biosynthesis of pyrimidines, converting dihydroorotic acid into orotic acid
YKL173W	86.6679	-0.0578533	0.351347	0.990857	86.6679	-0.225875	0.478626	0.995869	86.6679	0.168022	0.593737	0.999985	SNU114	GTPase component of U5 snRNP involved in mRNA splicing via spliceosome; binds directly to U5 snRNA; proposed to be involved in conformational changes of the spliceosome; similarity to ribosomal translocation factor EF-2
YBR273C	80.3438	0.285955	0.432045	0.918407	80.3438	-0.166507	0.556979	0.995869	80.3438	0.452462	0.704903	0.999985	UBX7	UBX (ubiquitin regulatory X) domain-containing protein that interacts with Cdc48p
YHR021C	366.047	-0.340189	0.329275	0.830843	366.047	0.175775	0.44809	0.995869	366.047	-0.515964	0.556064	0.999985	RPS27B	Protein component of the small (40S) ribosomal subunit; nearly identical to Rps27Ap and has similarity to rat S27 ribosomal protein
YDR264C	183.536	-0.536165	0.311953	0.563342	183.536	-0.0121829	0.427141	0.995869	183.536	-0.523983	0.528927	0.999985	AKR1	Palmitoyl transferase involved in protein palmitoylation; acts as a negative regulator of pheromone response pathway; required for endocytosis of pheromone receptors; involved in cell shape control; contains ankyrin repeats
YKL027W	67.8966	-0.157822	0.404909	0.979652	67.8966	-0.805836	0.551044	0.995869	67.8966	0.648014	0.683792	0.999985		Protein of unknown function, localized to the mitochondrial outer membrane
YGR047C	72.87	-0.031109	0.393021	0.996333	72.87	-0.158411	0.517547	0.995869	72.87	0.127302	0.649859	0.999985	TFC4	One of six subunits of the RNA polymerase III transcription initiation factor complex (TFIIIC); part of the TauA domain of TFIIIC that binds BoxA DNA promoter sites of tRNA and similar genes; has TPR motifs; human homolog is TFIIIC-102
YDR365C	206.992	-0.418974	0.327663	0.71659	206.992	-0.497454	0.450319	0.995869	206.992	0.0784801	0.556908	0.999985	ESF1	Nucleolar protein involved in pre-rRNA processing; depletion causes severely decreased 18S rRNA levels
YGR146C	27.1687	0.395333	0.543049	0.903452	27.1687	0.968855	0.627602	0.995869	27.1687	-0.573521	0.829927	0.999985	ECL1	Protein of unknown function, affects chronological lifespan; induced by iron homeostasis transcription factor Aft2p; multicopy suppressor of temperature sensitive hsf1 mutant; induced by treatment with 8-methoxypsoralen and UVA irradiation
YOR209C	211.158	0.313548	0.297276	0.824259	211.158	0.154966	0.425966	0.995869	211.158	0.158582	0.519442	0.999985	NPT1	Nicotinate phosphoribosyltransferase, acts in the salvage pathway of NAD+ biosynthesis; required for silencing at rDNA and telomeres and has a role in silencing at mating-type loci; localized to the nucleus
YER144C	31.9966	-0.508553	0.528147	0.843811	31.9966	0.147266	0.618593	0.995869	31.9966	-0.655819	0.813395	0.999985	UBP5	Putative ubiquitin-specific protease, closest paralog of Doa4p but has no functional overlap; concentrates at the bud neck
YKL126W	184.08	0.343259	0.301338	0.802954	184.08	0.367405	0.419551	0.995869	184.08	-0.0241463	0.516554	0.999985	YPK1	Serine/threonine protein kinase that phosphorylates and downregulates flippase activator Fpk1p; mutations affect receptor-mediated endocytosis and sphingolipid-mediated and cell integrity signaling pathways; homolog of mammalian kinase SGK
YOR281C	83.3456	0.0393321	0.367601	0.994831	83.3456	0.0757499	0.501391	0.995869	83.3456	-0.0364178	0.621711	0.999985	PLP2	Essential protein that interacts with the CCT (chaperonin containing TCP-1) complex to stimulate actin folding; has similarity to phosducins; null mutant lethality is complemented by mouse phosducin-like protein MgcPhLP
YIL124W	96.1978	0.672161	0.384143	0.550195	96.1978	0.721713	0.506826	0.995869	96.1978	-0.0495523	0.635951	0.999985	AYR1	NADPH-dependent 1-acyl dihydroxyacetone phosphate reductase found in lipid particles, ER, and mitochondrial outer membrane; involved in phosphatidic acid biosynthesis; required for spore germination; capable of metabolizing steroid hormones
YML065W	159.836	0.14534	0.464606	0.984538	159.836	-0.843464	0.580318	0.995869	159.836	0.988804	0.743388	0.999985	ORC1	Largest subunit of the origin recognition complex, which directs DNA replication by binding to replication origins and is also involved in transcriptional silencing; exhibits ATPase activity
YNL088W	528.273	0.534925	0.270298	0.41229	528.273	0.376164	0.377563	0.995869	528.273	0.158761	0.464343	0.999985	TOP2	Topoisomerase II, relieves torsional strain in DNA by cleaving and re-sealing the phosphodiester backbone of both positively and negatively supercoiled DNA; cleaves complementary strands; localizes to axial cores in meiosis
Q0075	66.0504	-0.131096	0.538521	0.98531	66.0504	0.292748	0.604206	0.995869	66.0504	-0.423844	0.809371	0.999985	AI5_BETA	Protein of unknown function, encoded within an intron of the mitochondrial COX1 gene; translational initiation codon is predicted to be ATA rather than ATG
YPL183C	147.87	-0.670007	0.328198	0.385865	147.87	-0.857243	0.442774	0.995869	147.87	0.187236	0.551132	0.999985	RTT10	Cytoplasmic protein with a role in regulation of Ty1 transposition
YNL189W	424.344	0.0838507	0.288306	0.984538	424.344	0.00644251	0.399264	0.995869	424.344	0.0774082	0.492476	0.999985	SRP1	Karyopherin alpha homolog, forms a dimer with karyopherin beta Kap95p to mediate import of nuclear proteins, binds the nuclear localization signal of the substrate during import; may also play a role in regulation of protein degradation
YLR228C	69.4594	0.065376	0.400702	0.990857	69.4594	-0.0648127	0.517897	0.995869	69.4594	0.130189	0.654811	0.999985	ECM22	Sterol regulatory element binding protein, regulates transcription of sterol biosynthetic genes; contains Zn
YPL082C	169.974	-0.26586	0.362567	0.903452	169.974	-0.46191	0.474414	0.995869	169.974	0.19605	0.597092	0.999985	MOT1	Essential abundant protein involved in regulation of transcription, removes Spt15p (TBP) from DNA via its C-terminal ATPase activity, forms a complex with TBP that binds TATA DNA with high affinity but with altered specificity
YGR245C	429.586	-0.511915	0.308581	0.583343	429.586	-1.01568	0.425554	0.821161	429.586	0.503762	0.525657	0.999985	SDA1	Highly conserved nuclear protein required for actin cytoskeleton organization and passage through Start, plays a critical role in G1 events, binds Nap1p, also involved in 60S ribosome biogenesis
YBR060C	39.291	-0.962294	0.450929	0.330704	39.291	-0.409896	0.565228	0.995869	39.291	-0.552398	0.72301	0.999985	ORC2	Subunit of the origin recognition complex, which directs DNA replication by binding to replication origins and is also involved in transcriptional silencing; interacts with Spp1p and with trimethylated histone H3; phosphorylated by Cdc28p
YNL101W	40.2606	-0.656823	0.454584	0.646744	40.2606	0.312298	0.563729	0.995869	40.2606	-0.969121	0.724204	0.999985	AVT4	Vacuolar transporter, exports large neutral amino acids from the vacuole; member of a family of seven S. cerevisiae genes (AVT1-7) related to vesicular GABA-glycine transporters
YMR116C	4987.23	0.183196	0.254351	0.903452	4987.23	0.192354	0.347925	0.995869	4987.23	-0.0091584	0.430983	0.999985	ASC1	G-protein beta subunit and guanine nucleotide dissociation inhibitor for Gpa2p; ortholog of RACK1 that inhibits translation; core component of the small (40S) ribosomal subunit; represses Gcn4p in the absence of amino acid starvation
YFL008W	155.201	0.847863	0.353889	0.227636	155.201	0.357651	0.475124	0.995869	155.201	0.490212	0.592434	0.999985	SMC1	Subunit of the multiprotein cohesin complex, essential protein involved in chromosome segregation and in double-strand DNA break repair; SMC chromosomal ATPase family member, binds DNA with a preference for DNA with secondary structure
YER089C	228.578	0.0515301	0.300047	0.990328	228.578	0.287778	0.417143	0.995869	228.578	-0.236248	0.513846	0.999985	PTC2	Type 2C protein phosphatase (PP2C); dephosphorylates Hog1p to limit maximal osmostress induced kinase activity; dephosphorylates Ire1p to downregulate the unfolded protein response; dephosphorylates Cdc28p; inactivates the DNA checkpoint
YDL208W	113.667	-0.953041	0.367907	0.173382	113.667	-0.396372	0.498867	0.995869	113.667	-0.556669	0.619844	0.999985	NHP2	Nuclear protein related to mammalian high mobility group (HMG) proteins, essential for function of H/ACA-type snoRNPs, which are involved in 18S rRNA processing
YGR065C	61.5029	0.132683	0.398236	0.984538	61.5029	-0.244712	0.521798	0.995869	61.5029	0.377396	0.656402	0.999985	VHT1	High-affinity plasma membrane H+-biotin (vitamin H) symporter; mutation results in fatty acid auxotrophy; 12 transmembrane domain containing major facilitator subfamily member; mRNA levels negatively regulated by iron deprivation and biotin
YNL220W	296.839	0.631793	0.301827	0.350511	296.839	0.726739	0.433327	0.995869	296.839	-0.0949463	0.528081	0.999985	ADE12	Adenylosuccinate synthase, catalyzes the first step in synthesis of adenosine monophosphate from inosine 5'monophosphate during purine nucleotide biosynthesis; exhibits binding to single-stranded autonomously replicating (ARS) core sequence
YGR267C	75.8221	0.372822	0.364542	0.830872	75.8221	-0.582305	0.518265	0.995869	75.8221	0.955127	0.633633	0.999985	FOL2	GTP-cyclohydrolase I, catalyzes the first step in the folic acid biosynthetic pathway
YBR143C	476.088	-0.332227	0.263013	0.719922	476.088	0.0195988	0.371313	0.995869	476.088	-0.351826	0.455026	0.999985	SUP45	Polypeptide release factor (eRF1) in translation termination; mutant form acts as a recessive omnipotent suppressor; methylated by Mtq2p-Trm112p in ternary complex eRF1-eRF3-GTP; mutation of methylation site confers resistance to zymocin
YNL321W	119.258	0.301435	0.341661	0.876617	119.258	-0.368198	0.462522	0.995869	119.258	0.669632	0.575029	0.999985	VNX1	Calcium/H+ antiporter localized to the endoplasmic reticulum membrane; member of the calcium exchanger (CAX) family; potential Cdc28p substrate
YNL123W	258.42	-0.103713	0.281225	0.981235	258.42	-0.280596	0.393178	0.995869	258.42	0.176883	0.483401	0.999985	NMA111	Serine protease and general molecular chaperone; involved in response to heat stress and promotion of apoptosis; may contribute to lipid homeostasis; sequence similarity to the mammalian Omi/HtrA2 family of serine proteases
YHR149C	63.2043	0.127652	0.472697	0.984538	63.2043	0.351719	0.583395	0.995869	63.2043	-0.224067	0.750864	0.999985	SKG6	Integral membrane protein that localizes primarily to growing sites such as the bud tip or the cell periphery; potential Cdc28p substrate; Skg6p interacts with Zds1p and Zds2p
YOL100W	34.6767	0.0700568	0.473135	0.992628	34.6767	0.514015	0.575511	0.995869	34.6767	-0.443958	0.745043	0.999985	PKH2	Serine/threonine protein kinase involved in sphingolipid-mediated signaling pathway that controls endocytosis; activates Ypk1p and Ykr2p, components of signaling cascade required for maintenance of cell wall integrity; redundant with Pkh1p
YJL026W	1483.11	1.288	0.331065	0.00627846	1483.11	1.4475	0.442794	0.195218	1483.11	-0.159495	0.552875	0.999985	RNR2	Ribonucleotide-diphosphate reductase (RNR), small subunit; the RNR complex catalyzes the rate-limiting step in dNTP synthesis and is regulated by DNA replication and DNA damage checkpoint pathways via localization of the small subunits
YPR189W	217.46	0.48717	0.302666	0.595531	217.46	0.0943046	0.417532	0.995869	217.46	0.392866	0.515694	0.999985	SKI3	Ski complex component and TPR protein, mediates 3'-5' RNA degradation by the cytoplasmic exosome; null mutants have superkiller phenotype of increased viral dsRNAs and are synthetic lethal with mutations in 5'-3' mRNA decay
YIL142W	506.496	-0.0541937	0.264361	0.98971	506.496	0.196268	0.371904	0.995869	506.496	-0.250462	0.456289	0.999985	CCT2	Subunit beta of the cytosolic chaperonin Cct ring complex, related to Tcp1p, required for the assembly of actin and tubulins in vivo
YER122C	194.57	0.00549612	0.334899	0.997966	194.57	0.376324	0.451635	0.995869	194.57	-0.370828	0.562256	0.999985	GLO3	ADP-ribosylation factor GTPase activating protein (ARF GAP), involved in ER-Golgi transport; shares functional similarity with Gcs1p
YDR303C	74.9661	-0.201547	0.37365	0.946075	74.9661	-0.0462446	0.493509	0.995869	74.9661	-0.155302	0.619002	0.999985	RSC3	Component of the RSC chromatin remodeling complex; essential gene required for maintenance of proper ploidy and regulation of ribosomal protein genes and the cell wall/stress response; highly similar to Rsc30p
YMR229C	957.302	-0.265273	0.256533	0.830569	957.302	-0.486173	0.354904	0.995869	957.302	0.2209	0.437911	0.999985	RRP5	RNA binding protein with preference for single stranded tracts of U's involved in synthesis of both 18S and 5.8S rRNAs; component of both the ribosomal small subunit (SSU) processosome and the 90S preribosome
YKL207W	156.136	0.240688	0.318992	0.903452	156.136	0.19807	0.451996	0.995869	156.136	0.0426179	0.553224	0.999985	AIM27	Member of a transmembrane complex required for efficient folding of proteins in the ER; required for respiratory growth; null mutant displays induction of the unfolded protein response
YOR128C	112.961	0.400037	0.382908	0.827111	112.961	-0.148652	0.515818	0.995869	112.961	0.548689	0.642407	0.999985	ADE2	Phosphoribosylaminoimidazole carboxylase, catalyzes a step in the 'de novo' purine nucleotide biosynthetic pathway; red pigment accumulates in mutant cells deprived of adenine
YGR223C	34.7792	-0.289704	0.460315	0.926551	34.7792	0.539496	0.578484	0.995869	34.7792	-0.8292	0.739308	0.999985	HSV2	Phosphatidylinositol 3,5-bisphosphate-binding protein, plays a role in micronucleophagy; predicted to fold as a seven-bladed beta-propeller; displays punctate cytoplasmic localization
YNL066W	189.791	-1.11138	0.302428	0.0130677	189.791	-0.79772	0.424928	0.995869	189.791	-0.313659	0.521548	0.999985	SUN4	Cell wall protein related to glucanases, possibly involved in cell wall septation; member of the SUN family
YJL062W	108.405	0.268015	0.337259	0.88906	108.405	0.446037	0.47888	0.995869	108.405	-0.178022	0.585723	0.999985	LAS21	Integral plasma membrane protein involved in the synthesis of the glycosylphosphatidylinositol (GPI) core structure; mutations affect cell wall integrity
YDR101C	211.891	-0.903279	0.372036	0.223416	211.891	-0.822981	0.499098	0.995869	211.891	-0.0802977	0.622492	0.999985	ARX1	Shuttling pre-60S factor; involved in the biogenesis of ribosomal large subunit biogenesis; interacts directly with Alb1; responsible for Tif6 recycling defects in absence of Rei1; associated with the ribosomal export complex
YPR145W	1267.07	0.213821	0.265347	0.88906	1267.07	0.293012	0.36446	0.995869	1267.07	-0.0791908	0.450821	0.999985	ASN1	Asparagine synthetase, isozyme of Asn2p; catalyzes the synthesis of L-asparagine from L-aspartate in the asparagine biosynthetic pathway
YML102W	54.9188	0.636958	0.422642	0.629533	54.9188	0.00541743	0.555308	0.995869	54.9188	0.631541	0.69785	0.999985	CAC2	Component of the chromatin assembly complex (with Rlf2p and Msi1p) that assembles newly synthesized histones onto recently replicated DNA, required for building functional kinetochores, conserved from yeast to humans
YLR181C	59.3889	0.0984042	0.418011	0.986813	59.3889	0.662714	0.550228	0.995869	59.3889	-0.564309	0.691013	0.999985	VTA1	Multivesicular body (MVB) protein involved in endosomal protein sorting; regulates Vps4p activity by promoting its oligomerization; has an N-terminal Vps60- and Did2- binding domain, a linker region, and a C-terminal Vps4p binding domain
YOL045W	83.4833	-0.161385	0.364271	0.964497	83.4833	-0.0655677	0.494942	0.995869	83.4833	-0.0958174	0.61454	0.999985	PSK2	One of two (see also PSK1) PAS domain containing S/T protein kinases; regulates sugar flux and translation in response to an unknown metabolite by phosphorylating Ugp1p and Gsy2p (sugar flux) and Caf20p, Tif11p and Sro9p (translation)
YDR505C	76.064	0.241808	0.407807	0.936529	76.064	0.123093	0.519686	0.995869	76.064	0.118715	0.660591	0.999985	PSP1	Asn and gln rich protein of unknown function; high-copy suppressor of POL1 (DNA polymerase alpha) and partial suppressor of CDC2 (polymerase delta) and CDC6 (pre-RC loading factor) mutations; overexpression results in growth inhibition
YOL144W	86.3717	-0.665917	0.397931	0.578821	86.3717	-0.733031	0.547864	0.995869	86.3717	0.0671141	0.677081	0.999985	NOP8	Nucleolar protein required for 60S ribosomal subunit biogenesis
YKL140W	72.9628	0.36754	0.378974	0.841273	72.9628	0.0307551	0.514263	0.995869	72.9628	0.336785	0.638817	0.999985	TGL1	Steryl ester hydrolase, one of three gene products (Yeh1p, Yeh2p, Tgl1p) responsible for steryl ester hydrolase activity and involved in sterol homeostasis; localized to lipid particle membranes
YCR012W	11994.9	0.593689	0.278478	0.330704	11994.9	0.652191	0.376349	0.995869	11994.9	-0.0585025	0.468176	0.999985	PGK1	3-phosphoglycerate kinase, catalyzes transfer of high-energy phosphoryl groups from the acyl phosphate of 1,3-bisphosphoglycerate to ADP to produce ATP; key enzyme in glycolysis and gluconeogenesis
YDR334W	109.636	-0.21932	0.35847	0.933902	109.636	-0.198904	0.463407	0.995869	109.636	-0.020416	0.58587	0.999985	SWR1	Swi2/Snf2-related ATPase that is the structural component of the SWR1 complex, which exchanges histone variant H2AZ (Htz1p) for chromatin-bound histone H2A
YNL037C	279.074	-0.00493751	0.390358	0.997966	279.074	-0.0963593	0.507452	0.995869	279.074	0.0914218	0.640224	0.999985	IDH1	Subunit of mitochondrial NAD(+)-dependent isocitrate dehydrogenase, which catalyzes the oxidation of isocitrate to alpha-ketoglutarate in the TCA cycle
YJL110C	49.2428	0.30622	0.434539	0.906905	49.2428	-0.316078	0.5378	0.995869	49.2428	0.622298	0.691414	0.999985	GZF3	GATA zinc finger protein and Dal80p homolog that negatively regulates nitrogen catabolic gene expression by competing with Gat1p for GATA site binding; function requires a repressive carbon source; dimerizes with Dal80p and binds to Tor1p
YLR344W	852.152	-0.0896744	0.311099	0.984538	852.152	0.0620664	0.421649	0.995869	852.152	-0.151741	0.523994	0.999985	RPL26A	Protein component of the large (60S) ribosomal subunit, nearly identical to Rpl26Bp and has similarity to E. coli L24 and rat L26 ribosomal proteins; binds to 5.8S rRNA
YIL074C	112.082	0.0547758	0.351282	0.991029	112.082	0.314249	0.482495	0.995869	112.082	-0.259473	0.596827	0.999985	SER33	3-phosphoglycerate dehydrogenase, catalyzes the first step in serine and glycine biosynthesis; isozyme of Ser3p
YOR294W	105.176	-0.445175	0.396751	0.802954	105.176	-0.241586	0.553135	0.995869	105.176	-0.203589	0.680703	0.999985	RRS1	Essential protein that binds ribosomal protein L11 and is required for nuclear export of the 60S pre-ribosomal subunit during ribosome biogenesis; mouse homolog shows altered expression in Huntington's disease model mice
YLR419W	151.859	-0.153243	0.309819	0.952862	151.859	-0.692418	0.437639	0.995869	151.859	0.539175	0.536196	0.999985		Putative helicase with limited sequence similarity to human Rb protein; the authentic, non-tagged protein is detected in highly purified mitochondria in high-throughput studies; YLR419W is not an essential gene
YJR138W	81.8599	-0.227066	0.38289	0.936529	81.8599	-0.117205	0.506269	0.995869	81.8599	-0.109861	0.634752	0.999985	IML1	Protein of unknown function, green fluorescent protein (GFP)-fusion protein localizes to the vacuolar membrane
YJL154C	148.05	0.19128	0.332549	0.940196	148.05	0.337977	0.446415	0.995869	148.05	-0.146697	0.556664	0.999985	VPS35	Endosomal subunit of membrane-associated retromer complex required for retrograde transport; receptor that recognizes retrieval signals on cargo proteins, forms subcomplex with Vps26p and Vps29p that selects cargo proteins for retrieval
YNL271C	254.563	0.201974	0.336495	0.935731	254.563	-0.0869906	0.446932	0.995869	254.563	0.288964	0.559443	0.999985	BNI1	Formin, nucleates the formation of linear actin filaments, involved in cell processes such as budding and mitotic spindle orientation which require the formation of polarized actin cables, functionally redundant with BNR1
YKL032C	74.0381	-0.176893	0.37127	0.954817	74.0381	-0.411866	0.494744	0.995869	74.0381	0.234972	0.618548	0.999985	IXR1	Protein that binds DNA containing intrastrand cross-links formed by cisplatin, contains two HMG (high mobility group box) domains, which confer the ability to bend cisplatin-modified DNA; mediates aerobic transcriptional repression of COX5b
YGR135W	256.704	0.167822	0.285008	0.937584	256.704	-0.448565	0.405526	0.995869	256.704	0.616387	0.495661	0.999985	PRE9	Alpha 3 subunit of the 20S proteasome, the only nonessential 20S subunit; may be replaced by the alpha 4 subunit (Pre6p) under stress conditions to create a more active proteasomal isoform
YER173W	28.8578	-0.3122	0.528471	0.936529	28.8578	-0.35277	0.616074	0.995869	28.8578	0.0405703	0.811658	0.999985	RAD24	Checkpoint protein, involved in the activation of the DNA damage and meiotic pachytene checkpoints; subunit of a clamp loader that loads Rad17p-Mec3p-Ddc1p onto DNA; homolog of human and S. pombe Rad17 protein
YMR058W	1183.66	-0.654747	0.310349	0.341613	1183.66	-0.551338	0.415818	0.995869	1183.66	-0.103409	0.518866	0.999985	FET3	Ferro-O2-oxidoreductase required for high-affinity iron uptake and involved in mediating resistance to copper ion toxicity, belongs to class of integral membrane multicopper oxidases
YDR172W	759.029	0.0297839	0.253207	0.994689	759.029	0.0607476	0.355522	0.995869	759.029	-0.0309638	0.436474	0.999985	SUP35	Translation termination factor eRF3; altered protein conformation creates the
YIL030C	222.824	-0.357511	0.322518	0.808474	222.824	-0.317403	0.437513	0.995869	222.824	-0.0401072	0.543539	0.999985	SSM4	Ubiquitin-protein ligase involved in ER-associated protein degradation; located in the ER/nuclear envelope; ssm4 mutation suppresses mRNA instability caused by an rna14 mutation
YBL091C	269.316	0.263821	0.309258	0.879211	269.316	0.255362	0.430269	0.995869	269.316	0.00845852	0.529879	0.999985	MAP2	Methionine aminopeptidase, catalyzes the cotranslational removal of N-terminal methionine from nascent polypeptides; function is partially redundant with that of Map1p
YMR278W	130.986	0.0597698	0.340743	0.990328	130.986	0.0061088	0.467002	0.995869	130.986	0.053661	0.578097	0.999985	PGM3	Phosphoglucomutase, catalyzes interconversion of glucose-1-phosphate and glucose-6-phospate; transcription induced in response to stress; green fluorescent protein (GFP)-fusion protein localizes to the cytoplasm and nucleus; non-essential
YKL054C	441.938	0.177609	0.28676	0.931091	441.938	0.056154	0.394445	0.995869	441.938	0.121455	0.487666	0.999985	DEF1	RNAPII degradation factor, forms a complex with Rad26p in chromatin, enables ubiquitination and proteolysis of RNAPII present in an elongation complex; mutant is deficient in Zip1p loading onto chromosomes during meiosis
YER072W	168.912	0.282584	0.301249	0.847139	168.912	0.153794	0.448571	0.995869	168.912	0.12879	0.54034	0.999985	VTC1	Subunit of the vacuolar transporter chaperone (VTC) complex involved in membrane trafficking, vacuolar polyphosphate accumulation, microautophagy and non-autophagic vacuolar fusion; also has mRNA binding activity
YDR037W	1507.73	0.0254416	0.270547	0.995124	1507.73	-0.2752	0.372026	0.995869	1507.73	0.300642	0.459999	0.999985	KRS1	Lysyl-tRNA synthetase
YDR510W	180.885	-0.125223	0.348412	0.982785	180.885	0.301112	0.474886	0.995869	180.885	-0.426335	0.58899	0.999985	SMT3	Ubiquitin-like protein of the SUMO family, conjugated to lysine residues of target proteins; regulates chromatid cohesion, chromosome segregation, APC-mediated proteolysis, DNA replication and septin ring dynamics; phosphorylated at Ser2
YOR359W	37.2015	-0.848605	0.493297	0.563342	37.2015	-0.885591	0.592493	0.995869	37.2015	0.0369861	0.770835	0.999985	VTS1	Post-transcriptional gene regulator, flap-structured DNA-binding and RNA-binding protein; shows genetic interactions with Vti1p, a v-SNARE involved in cis-Golgi membrane traffic; stimulates Dna2p endonuclease activity; contains a SAM domain
YOR197W	167.238	0.369968	0.310334	0.769406	167.238	0.00628148	0.434129	0.995869	167.238	0.363686	0.533643	0.999985	MCA1	Putative cysteine protease similar to mammalian caspases; involved in regulation of apoptosis upon hydrogen peroxide treatment; proposed to be involved in cell cycle progression
YMR195W	43.5235	0.396773	0.556664	0.903497	43.5235	0.396903	0.632384	0.995869	43.5235	-0.000129652	0.842487	0.999985	ICY1	Protein of unknown function, required for viability in rich media of cells lacking mitochondrial DNA; mutants have an invasive growth defect with elongated morphology; induced by amino acid starvation
YHR190W	371.995	0.22847	0.290784	0.890444	371.995	-0.0325599	0.410251	0.995869	371.995	0.26103	0.502853	0.999985	ERG9	Farnesyl-diphosphate farnesyl transferase (squalene synthase), joins two farnesyl pyrophosphate moieties to form squalene in the sterol biosynthesis pathway
YJL176C	81.3759	-0.408533	0.368955	0.808474	81.3759	-0.46655	0.488081	0.995869	81.3759	0.0580164	0.611829	0.999985	SWI3	Subunit of the SWI/SNF chromatin remodeling complex, which regulates transcription by remodeling chromosomes; required for transcription of many genes, including ADH1, ADH2, GAL1, HO, INO1 and SUC2
YML016C	91.0115	0.285883	0.381715	0.903452	91.0115	-0.19286	0.501087	0.995869	91.0115	0.478744	0.629916	0.999985	PPZ1	Serine/threonine protein phosphatase Z, isoform of Ppz2p; involved in regulation of potassium transport, which affects osmotic stability, cell cycle progression, and halotolerance
YJR039W	30.7751	-0.0936475	0.497901	0.98971	30.7751	0.0825534	0.595841	0.995869	30.7751	-0.176201	0.77649	0.999985		Putative protein of unknown function; the authentic, non-tagged protein is detected in highly purified mitochondria in high-throughput studies
YBR031W	5270.99	-0.0197038	0.28091	0.996333	5270.99	-0.206731	0.379948	0.995869	5270.99	0.187027	0.472516	0.999985	RPL4A	N-terminally acetylated protein component of the large (60S) ribosomal subunit, nearly identical to Rpl4Bp and has similarity to E. coli L4 and rat L4 ribosomal proteins
YGL094C	95.3193	0.190934	0.382447	0.952862	95.3193	-0.317659	0.504128	0.995869	95.3193	0.508593	0.632779	0.999985	PAN2	Essential subunit of the Pan2p-Pan3p poly(A)-ribonuclease complex, which acts to control poly(A) tail length and regulate the stoichiometry and activity of postreplication repair complexes
YKL010C	288.748	0.272397	0.283378	0.843811	288.748	0.0386814	0.396458	0.995869	288.748	0.233716	0.487321	0.999985	UFD4	Ubiquitin-protein ligase (E3) that interacts with Rpt4p and Rpt6p, two subunits of the 19S particle of the 26S proteasome; cytoplasmic E3 involved in the degradation of ubiquitin fusion proteins
YPR037C	83.7063	0.12708	0.408565	0.984538	83.7063	1.02826	0.558216	0.995869	83.7063	-0.901184	0.691768	0.999985	ERV2	Flavin-linked sulfhydryl oxidase localized to the endoplasmic reticulum lumen, involved in disulfide bond formation within the ER
YPL178W	76.3716	-0.313809	0.362722	0.876617	76.3716	0.00595311	0.495318	0.995869	76.3716	-0.319762	0.613928	0.999985	CBC2	Small subunit of the heterodimeric cap binding complex that also contains Sto1p, component of the spliceosomal commitment complex; interacts with Npl3p, possibly to package mRNA for export from the nucleus; contains an RNA-binding motif
YOR078W	53.6865	-0.99691	0.463502	0.323855	53.6865	0.280621	0.575313	0.995869	53.6865	-1.27753	0.738821	0.999985	BUD21	Component of small ribosomal subunit (SSU) processosome that contains U3 snoRNA; originally isolated as bud-site selection mutant that displays a random budding pattern
YDR150W	489.803	-0.335005	0.331806	0.83248	489.803	-0.710071	0.441811	0.995869	489.803	0.375066	0.552531	0.999985	NUM1	Protein required for nuclear migration, localizes to the mother cell cortex and the bud tip; may mediate interactions of dynein and cytoplasmic microtubules with the cell cortex
YDR477W	156.827	0.176684	0.305403	0.940196	156.827	0.136503	0.427959	0.995869	156.827	0.0401815	0.525757	0.999985	SNF1	AMP-activated serine/threonine protein kinase found in a complex containing Snf4p and members of the Sip1p/Sip2p/Gal83p family; required for transcription of glucose-repressed genes, thermotolerance, sporulation, and peroxisome biogenesis
YGR070W	53.7388	-0.112882	0.456785	0.98531	53.7388	-0.128148	0.558619	0.995869	53.7388	0.0152663	0.721598	0.999985	ROM1	GDP/GTP exchange protein (GEP) for Rho1p; mutations are synthetically lethal with mutations in rom2, which also encodes a GEP
YIL131C	86.0805	-0.47352	0.409	0.792716	86.0805	0.258927	0.538052	0.995869	86.0805	-0.732446	0.675862	0.999985	FKH1	Forkhead family transcription factor with a minor role in the expression of G2/M phase genes; negatively regulates transcriptional elongation; positive role in chromatin silencing at HML and HMR; regulates donor preference during switching
YDL097C	229.685	0.301754	0.307456	0.840489	229.685	0.145477	0.42569	0.995869	229.685	0.156276	0.525111	0.999985	RPN6	Essential, non-ATPase regulatory subunit of the 26S proteasome lid required for the assembly and activity of the 26S proteasome; the human homolog (S9 protein) partially rescues Rpn6p depletion
YGR118W	1352.73	0.10953	0.245929	0.964127	1352.73	0.0812995	0.342055	0.995869	1352.73	0.0282309	0.421287	0.999985	RPS23A	Ribosomal protein 28 (rp28) of the small (40S) ribosomal subunit, required for translational accuracy; nearly identical to Rps23Bp and similar to E. coli S12 and rat S23 ribosomal proteins; deletion of both RPS23A and RPS23B is lethal
YOL063C	51.2186	-0.347759	0.422355	0.887234	51.2186	0.0451815	0.531231	0.995869	51.2186	-0.392941	0.678669	0.999985	CRT10	Protein involved in transcriptional regulation of RNR2 and RNR3; expression of the gene is induced by DNA damage and null mutations confer increased resistance to hydroxyurea; N-terminal region has a leucine repeat and a WD40 repeat
YER005W	37.331	-0.701185	0.463874	0.629533	37.331	-0.287317	0.570837	0.995869	37.331	-0.413869	0.73552	0.999985	YND1	Apyrase with wide substrate specificity, involved in preventing the inhibition of glycosylation by hydrolyzing nucleoside tri- and diphosphates which are inhibitors of glycotransferases; partially redundant with Gda1p
YGR007W	77.9032	-0.131286	0.374833	0.98435	77.9032	-0.207135	0.507461	0.995869	77.9032	0.0758489	0.630882	0.999985	ECT1	Ethanolamine-phosphate cytidylyltransferase, catalyzes the second step of phosphatidylethanolamine biosynthesis; involved in the maintenance of plasma membrane; similar to mammalian CTP: phosphocholine cytidylyl-transferases
YDR325W	87.5136	-0.281277	0.381935	0.903452	87.5136	-0.663496	0.502595	0.995869	87.5136	0.382219	0.631239	0.999985	YCG1	Subunit of the condensin complex; required for establishment and maintenance of chromosome condensation, chromosome segregation and chromatin binding of the condensin complex; required for clustering of tRNA genes at the nucleolus
YDR127W	963.868	0.294865	0.266543	0.809003	963.868	0.344098	0.365902	0.995869	963.868	-0.0492327	0.452691	0.999985	ARO1	Pentafunctional arom protein, catalyzes steps 2 through 6 in the biosynthesis of chorismate, which is a precursor to aromatic amino acids
YKL166C	36.6309	-0.293914	0.45507	0.924131	36.6309	-0.0377322	0.577586	0.995869	36.6309	-0.256182	0.735316	0.999985	TPK3	cAMP-dependent protein kinase catalytic subunit; promotes vegetative growth in response to nutrients via the Ras-cAMP signaling pathway; partially redundant with Tpk1p and Tpk2p; localizes to P-bodies during stationary phase
YMR184W	53.7737	0.671015	0.416697	0.595531	53.7737	0.420821	0.563526	0.995869	53.7737	0.250194	0.700844	0.999985	ADD37	Protein of unknown function involved in ER-associated protein degradation; green fluorescent protein (GFP)-fusion protein localizes to the cytoplasm and is induced in response to the DNA-damaging agent MMS; YMR184W is not an essential gene
YOR087W	69.9743	0.0123667	0.386434	0.997966	69.9743	-0.349503	0.51805	0.995869	69.9743	0.36187	0.646299	0.999985	YVC1	Vacuolar cation channel, mediates release of Ca(2+) from the vacuole in response to hyperosmotic shock
YML061C	60.704	0.508093	0.46205	0.810561	60.704	0.81783	0.582019	0.995869	60.704	-0.309737	0.74312	0.999985	PIF1	DNA helicase; exists in a nuclear form that acts as a catalytic inhibitor of telomerase; and as a mitochondrial form involved in repair and recombination of mitochondrial DNA; mutations affect zinc and iron homeostasis
YJL101C	219.465	0.578084	0.326366	0.537175	219.465	0.871562	0.442742	0.995869	219.465	-0.293478	0.550031	0.999985	GSH1	Gamma glutamylcysteine synthetase catalyzes the first step in glutathione (GSH) biosynthesis; expression induced by oxidants, cadmium, and mercury
YPR163C	966.019	-0.113147	0.304236	0.981235	966.019	-0.112493	0.413217	0.995869	966.019	-0.00065363	0.513135	0.999985	TIF3	Translation initiation factor eIF-4B, has RNA annealing activity; contains an RNA recognition motif and binds to single-stranded RNA
YFL048C	105.593	-0.0572388	0.327492	0.990328	105.593	-0.305031	0.468407	0.995869	105.593	0.247792	0.571535	0.999985	EMP47	Integral membrane component of endoplasmic reticulum-derived COPII-coated vesicles, which function in ER to Golgi transport
YMR122W-A	138.274	0.105188	0.390346	0.984538	138.274	-0.385013	0.517089	0.995869	138.274	0.490201	0.64788	0.999985		Protein of unknown function; green fluorescent protein (GFP)-fusion protein localizes to the cytoplasm and endoplasmic reticulum
YJL044C	50.0867	-0.41935	0.494163	0.88055	50.0867	-0.0672298	0.595453	0.995869	50.0867	-0.35212	0.773794	0.999985	GYP6	GTPase-activating protein (GAP) for the yeast Rab family member, Ypt6p; involved in vesicle mediated protein transport
YNL206C	72.0852	0.403729	0.372125	0.8179	72.0852	0.0311553	0.503073	0.995869	72.0852	0.372574	0.625747	0.999985	RTT106	Histone chaperone, involved in regulation of chromatin structure in both transcribed and silenced chromosomal regions; affects transcriptional elongation; has a role in regulation of Ty1 transposition
YNL307C	186.667	0.20921	0.372327	0.940196	186.667	0.229173	0.497849	0.995869	186.667	-0.0199633	0.621676	0.999985	MCK1	Protein serine/threonine/tyrosine (dual-specificity) kinase involved in control of chromosome segregation and in regulating entry into meiosis; related to mammalian glycogen synthase kinases of the GSK-3 family
YOL027C	198.344	0.0456477	0.318254	0.993225	198.344	-0.335107	0.436257	0.995869	198.344	0.380755	0.540005	0.999985	MDM38	Mitochondrial inner membrane protein, involved in membrane integration of a subset of mitochondrial proteins; required for K+/H+ exchange; associates with mitochondrial ribosomes; human ortholog Letm1 implicated in Wolf-Hirschhorn syndrome
YLR369W	54.4765	0.685802	0.446367	0.625752	54.4765	0.117296	0.574242	0.995869	54.4765	0.568505	0.727319	0.999985	SSQ1	Mitochondrial hsp70-type molecular chaperone, required for assembly of iron/sulfur clusters into proteins at a step after cluster synthesis, and for maturation of Yfh1p, which is a homolog of human frataxin implicated in Friedreich's ataxia
YDR466W	38.7664	-0.518405	0.460843	0.802954	38.7664	-0.36848	0.567514	0.995869	38.7664	-0.149925	0.731033	0.999985	PKH3	Protein kinase with similarity to mammalian phosphoinositide-dependent kinase 1 (PDK1) and yeast Pkh1p and Pkh2p, two redundant upstream activators of Pkc1p; identified as a multicopy suppressor of a pkh1 pkh2 double mutant
[truncated: 1,782 more rows]

## Sheet: Description
baseMeanRibo = average ribosome profiling read count between the two conditions (normalized for "library size")
[truncated: 6 more rows]
